# Supplementary material for: Transcriptome profiling of antiviral immune and dietary fatty acid dependent responses of Atlantic salmon macrophage-like cells
Source: BMC Genomics. 2017 Sep 8;18:706. doi: 10.1186/s12864-017-4099-2 (PMC5591513; doi:10.1186/s12864-017-4099-2)
Supplement: Supplementary file 4 — Complete list of significantly pIC- responsive probes identified by SAM (FDR < 0.05) and RP (PFP < 0.05) within each dietary group. (XLSX 788 kb) [file 12864_2017_4099_MOESM4_ESM.xlsx]

## Sheet: Sheet1
Supplemental Table S3. Complete list of significantly pIC- responsive probes identified by SAM (FDR < 0.05) and RP (PFP < 0.05) within each dietary group.
Fold-changes with white background: SAM-identified only. Fold-changes with black background: RP-identified only. Fold-changes with grey background: overlapping between SAM and RP.
Probe ID	BLASTx hit 1	FO7 fold change 2	FO5 fold change 2	Number of Blast2GO hits3	E-Value 4	Mean similarity for all hits	Number of GO terms	GO Names list 5	-
C114R051	cyclic amp-dependent transcription factor atf-3	11.4862	16.0555	50	3.6e-104	0.8226	19	C:nucleoplasm; C:nucleolus; C:CHOP-ATF3 complex; F:RNA polymerase II core promoter proximal region sequence-specific DNA binding; F:transcriptional repressor activity, RNA polymerase II core promoter proximal region sequence-specific binding; F:transcriptional activator activity, RNA polymerase II transcription regulatory region sequence-specific binding; F:transcription corepressor activity; F:p…	-
C035R009	vascular endothelial growth factor receptor 2-like isoform x1	10.8591	11.399	29	3.1e-106	0.5345	-	-	-
C178R019	---NA---	10.4771	9.68219	0	-	-	-	-	-
C194R060	coiled-coil domain-containing protein 112	10.0352	8.71701	50	4.3e-149	0.704	-	-	-
C007R019	optineurin (optn)	9.4033	8.69689	50	1.9e-111	0.6188	15	C:extracellular region; F:transferase activity; P:intracellular signal transduction; P:phosphorylation; F:protein serine/threonine kinase activity; F:receptor signaling protein activity; F:protein kinase activity; P:protein phosphorylation; F:nucleotide binding; F:ATP binding; F:kinase activity; P:signal transduction; C:intracellular; F:metal ion binding; C:nematocyst	-
C166R004	guanine nucleotide-binding protein g subunit alpha	9.32002	7.94749	50	1.4e-34	0.9816	69	C:ruffle; C:nucleus; C:endosome; C:cytosol; C:heterotrimeric G-protein complex; C:synaptic vesicle; C:cell junction; C:transport vesicle; C:dendrite; C:intrinsic component of membrane; C:trans-Golgi network membrane; C:sarcolemma; C:membrane raft; C:perinuclear region of cytoplasm; C:extracellular exosome; F:G-protein alpha-subunit binding; F:GTPase activity; F:adenylate cyclase activity; F:signa…	-
C215R077	junction plakoglobin-like	9.01087	8.597	50	3.7e-47	0.774	36	C:cytoskeleton; C:cell-cell adherens junction; C:focal adhesion; C:intercalated disc; C:catenin complex; C:desmosome; C:protein-DNA complex; C:cytoplasmic part; C:extracellular exosome; C:gamma-catenin-TCF7L2 complex; F:transcription coactivator activity; F:signal transducer activity; F:structural constituent of cell wall; F:protein phosphatase binding; F:nuclear hormone receptor binding; F:alpha…	-
C064R034	zinc-binding protein a33-like	8.77764	9.4534	50	2.2e-38	0.7838	2	C:intracellular; F:zinc ion binding	-
C241R154	optineurin (optn)	8.69589	9.32648	50	1.9e-111	0.6188	15	C:extracellular region; F:transferase activity; P:intracellular signal transduction; P:phosphorylation; F:protein serine/threonine kinase activity; F:receptor signaling protein activity; F:protein kinase activity; P:protein phosphorylation; F:nucleotide binding; F:ATP binding; F:kinase activity; P:signal transduction; C:intracellular; F:metal ion binding; C:nematocyst	-
C054R151	tnf receptor-associated factor 5	8.46299	5.53852	50	2.7e-121	0.7146	14	C:centrosome; C:cytosol; C:cytoplasmic side of plasma membrane; C:CD40 receptor complex; F:ubiquitin-protein transferase activity; F:signal transducer activity; F:zinc ion binding; F:ubiquitin protein ligase binding; F:thioesterase binding; P:positive regulation of cell proliferation; P:protein ubiquitination; P:regulation of apoptotic process; P:positive regulation of I-kappaB kinase/NF-kappaB s…	-
C090R054	e3 ubiquitin-protein ligase neurl3-like	8.46103	7.17925	50	1.2e-175	0.5878	1	F:zinc ion binding	-
C155R155	zinc-binding protein a33-like	8.37642	7.85621	50	8.2e-122	0.6412	3	C:intracellular; F:protein binding; F:zinc ion binding	-
C202R091	tumor necrosis factor alpha-induced protein 2	8.34647	6.3123	50	6.8e-77	0.7068	4	C:exocyst; F:SNARE binding; P:exocytosis; P:exocyst localization	-
C158R116	junction plakoglobin-like	7.9319	9.49389	50	0	0.8786	35	C:cytosol; C:intermediate filament; C:cell-cell adherens junction; C:focal adhesion; C:intercalated disc; C:catenin complex; C:Z disc; C:desmosome; C:protein-DNA complex; C:extracellular exosome; C:gamma-catenin-TCF7L2 complex; F:transcription coactivator activity; F:signal transducer activity; F:structural molecule activity; F:protein phosphatase binding; F:nuclear hormone receptor binding; F:al…	-
C128R121	adp-ribosylation factor-like protein 5b	7.86438	7.04045	50	1.6e-116	0.8964	4	C:intracellular; F:GTP binding; P:intracellular protein transport; P:small GTPase mediated signal transduction	-
C252R077	zona pellucida sperm-binding protein 4-like	7.8553	8.68986	50	0	0.5976	-	-	-
C178R061	rna-binding protein musashi homolog 2 isoform x1	7.63609	7.57021	50	0	0.8352	8	C:cytoplasm; C:polysome; F:nucleotide binding; F:protein binding; F:poly(U) RNA binding; F:poly(A) RNA binding; P:olfactory bulb development; P:stem cell development	-
C110R009	unnamed protein product, partial	7.55099	5.03794	1	3.7e-06	0.96	1	P:signal transduction	-
C229R092	heat shock protein 70	7.50837	7.66968	50	6.8e-137	0.9648	9	C:nucleus; C:cytoplasm; C:membrane; F:ATP binding; P:blood vessel development; P:response to xenobiotic stimulus; P:cellular response to heat; P:response to cadmium ion; P:camera-type eye morphogenesis	-
C135R124	ribonuclease p protein subunit p21	7.3845	9.82189	50	5e-42	0.737	5	C:nucleolar ribonuclease P complex; F:ribonuclease P activity; P:tRNA processing; P:response to drug; P:RNA phosphodiester bond hydrolysis, endonucleolytic	-
C035R126	heat shock protein 70	7.09105	6.65221	50	0	0.9596	9	C:nucleus; C:cytoplasm; C:membrane; F:ATP binding; P:blood vessel development; P:response to xenobiotic stimulus; P:cellular response to heat; P:response to cadmium ion; P:camera-type eye morphogenesis	-
C143R065	---NA---	7.06979	7.38279	0	-	-	-	-	-
C009R162	cysteine dioxygenase type 1	7.05103	7.19586	50	5.5e-143	0.8674	15	C:cytosol; F:ferrous iron binding; F:cysteine dioxygenase activity; P:sulfur amino acid biosynthetic process; P:inflammatory response; P:lactation; P:L-cysteine catabolic process; P:response to glucagon; P:cellular nitrogen compound metabolic process; P:taurine biosynthetic process; P:response to amino acid; P:response to ethanol; P:response to glucocorticoid; P:response to cAMP; P:oxidation-redu…	-
C212R026	probable e3 ubiquitin-protein ligase herc6 isoform x1	6.94031	5.47364	50	1.6e-111	0.7108	3	F:ubiquitin-protein transferase activity; F:ligase activity; P:protein ubiquitination	-
C122R052	tbc1 domain family member 9	6.90751	6.66991	50	3.9e-127	0.6944	1	F:calcium ion binding	-
C093R166	apoptosis facilitator bcl-2-like protein 14	6.89715	5.60417	50	5.1e-123	0.601	7	P:regulation of apoptotic process; F:protein kinase binding; P:apoptotic process; C:cytoplasm; C:intracellular organelle; C:cytosol; P:positive regulation of extrinsic apoptotic signaling pathway	-
C019R076	probable e3 ubiquitin-protein ligase herc3	6.84713	5.22404	50	7.8e-118	0.6372	3	F:ubiquitin-protein transferase activity; F:ligase activity; P:protein ubiquitination	-
C076R147	e3 ubiquitin-protein ligase rnf31	6.65451	9.54228	50	6.4e-168	0.8574	4	C:LUBAC complex; F:ubiquitin-protein transferase activity; F:zinc ion binding; P:protein ubiquitination	-
C147R129	---NA---	6.37754	5.28963	0	-	-	-	-	-
C110R078	---NA---	6.2398	6.59711	0	-	-	-	-	-
C190R155	probable e3 ubiquitin-protein ligase herc3	6.18097	5.11004	50	0	0.6228	6	C:integral component of membrane; F:ubiquitin-protein transferase activity; F:GTP binding; F:hydrolase activity; F:ligase activity; P:protein ubiquitination	-
C236R062	interferon-induced protein 44-like	6.16386	5.05835	50	8.4e-144	0.6696	1	F:GTP binding	-
C108R013	beta-1-syntrophin	6.09095	4.44803	50	0	0.8156	11	C:cytoplasm; C:cytoskeleton; C:focal adhesion; C:dystrophin-associated glycoprotein complex; C:sarcolemma; C:synapse; F:actin binding; F:structural molecule activity; F:calmodulin binding; F:PDZ domain binding; P:muscle contraction	-
C249R043	heat shock protein 70	5.86176	5.25431	50	0	0.9596	9	C:nucleus; C:cytoplasm; C:membrane; F:ATP binding; P:blood vessel development; P:response to xenobiotic stimulus; P:cellular response to heat; P:response to cadmium ion; P:camera-type eye morphogenesis	-
C260R047	cathepsin l1-like	5.83878	4.96571	50	5.5e-93	0.8342	4	C:extracellular space; C:lysosome; F:cysteine-type endopeptidase activity; P:proteolysis involved in cellular protein catabolic process	-
C107R007	---NA---	5.79175	4.1401	0	-	-	-	-	-
C175R073	---NA---	5.74444	5.41765	0	-	-	-	-	-
C020R020	camp-responsive element modulator isoform x21	5.71334	7.18589	50	4.5e-14	0.9904	18	C:nucleus; C:transcription factor complex; C:cytoplasm; F:core promoter sequence-specific DNA binding; F:transcription factor activity, sequence-specific DNA binding; F:cAMP response element binding protein binding; P:glucose metabolic process; P:fatty acid metabolic process; P:glycosphingolipid metabolic process; P:multicellular organismal development; P:spermatogenesis; P:cell differentiation; …	-
C182R164	---NA---	5.68371	5.82598	0	-	-	-	-	-
C080R031	interferon-induced protein 44-like	5.61583	5.06888	50	2.9e-103	0.6562	-	-	-
C172R091	p2y purinoceptor 1-like	5.60287	5.15867	50	6.7e-78	0.7302	3	C:integral component of membrane; F:G-protein coupled receptor activity; P:G-protein coupled receptor signaling pathway	-
C115R103	neuroepithelial cell-transforming gene 1	5.60158	5.79041	50	1.9e-66	0.8894	19	C:extracellular region; C:nucleus; C:cytosol; C:plasma membrane; F:Rho guanyl-nucleotide exchange factor activity; F:GTP-Rho binding; P:dendrite development; P:anterior commissure morphogenesis; P:regulation of axon extension; P:regulation of Rho protein signal transduction; P:positive regulation of apoptotic process; P:positive regulation of GTPase activity; P:neurotrophin TRK receptor signaling…	-
C088R141	tyrosine-protein kinase jak3-like	5.50662	5.42893	50	1.4e-98	0.7902	62	C:nucleoplasm; C:cytosol; C:cytoskeleton; C:caveola; C:extrinsic component of cytoplasmic side of plasma membrane; C:endosome lumen; F:non-membrane spanning protein tyrosine kinase activity; F:growth hormone receptor binding; F:interleukin-12 receptor binding; F:ATP binding; F:protein kinase binding; F:heme binding; F:histone kinase activity (H3-Y41 specific); F:SH2 domain binding; F:histone bind…	-
C019R137	ninjurin- partial	5.43646	6.15959	50	1.2e-24	0.7982	3	C:integral component of membrane; P:cell adhesion; P:tissue regeneration	-
C209R081	cd40 ligand	5.42015	5.88279	50	0	0.5574	7	C:extracellular space; C:membrane part; F:cytokine activity; F:tumor necrosis factor receptor binding; P:regulation of immunoglobulin production; P:immune response; P:positive regulation of biological process	-
C025R082	interferon gamma	5.40452	5.15034	50	6.4e-125	0.6188	11	C:extracellular region; F:interferon-gamma receptor binding; P:response to virus; P:positive regulation of gene expression; P:negative regulation of gene expression; P:hemopoiesis; P:defense response to bacterium; P:positive regulation of respiratory burst; P:interferon-gamma-mediated signaling pathway; P:endothelial to hematopoietic transition; P:positive regulation of STAT protein import into n…	-
C149R108	syndecan-2-a precursor	5.38582	6.20386	50	1.3e-89	0.7318	10	C:cell surface; C:integral component of membrane; C:extracellular matrix; P:sprouting angiogenesis; P:extracellular fibril organization; P:digestive tract development; P:dendrite morphogenesis; P:epiboly involved in gastrulation with mouth forming second; P:cell migration involved in heart development; P:Kupffer's vesicle development	-
C204R063	---NA---	5.36781	5.38644	0	-	-	-	-	-
C171R099	granzyme a-like	5.34059	3.97237	50	0	0.7208	2	F:serine-type endopeptidase activity; P:proteolysis	-
C236R027	cathepsin l1-like	5.32581	5.3037	50	0	0.6396	2	F:cysteine-type peptidase activity; P:proteolysis	-
C024R063	granzyme a-like	5.21922	5.02399	50	0	0.7208	2	F:serine-type endopeptidase activity; P:proteolysis	-
C188R077	---NA---	5.2144	5.48503	0	-	-	-	-	-
C033R157	opioid growth factor receptor-like protein 1	5.21018	5.67715	50	2.2e-163	0.7748	2	C:membrane; F:receptor activity	-
C026R005	heat shock 70 kda	5.14617	5.04959	50	1.8e-104	0.9682	69	C:ubiquitin ligase complex; C:Prp19 complex; C:photoreceptor inner segment; C:nucleoplasm; C:spliceosomal complex; C:nucleolus; C:lysosomal membrane; C:autophagosome; C:cytosol; C:microtubule; C:intermediate filament; C:plasma membrane; C:focal adhesion; C:synaptic vesicle; C:cell surface; C:postsynaptic density; C:asymmetric synapse; C:melanosome; C:terminal bouton; C:dendritic spine; C:dendriti…	-
C148R169	granzyme a-like	5.0601	4.83718	50	0	0.7208	2	F:serine-type endopeptidase activity; P:proteolysis	-
C163R108	---NA---	5.05543	5.7074	0	-	-	-	-	-
C190R005	---NA---	4.99159	4.56516	0	-	-	-	-	-
C025R042	tcb1 transposase	4.95597	5.35542	50	3e-50	0.742	15	C:nucleus; C:endosome; C:trans-Golgi network; C:integral component of membrane; C:clathrin-coated vesicle; F:DNA binding; F:transcription factor activity, sequence-specific DNA binding; F:catalytic activity; F:transporter activity; F:metal ion binding; F:phosphatidylinositol-3,5-bisphosphate binding; P:regulation of transcription, DNA-templated; P:transport; P:lysosome organization; P:cellular pr…	-
C167R015	pleckstrin homology-like domain family b member 1 isoform x1	4.95368	5.36285	50	0	0.8962	-	-	-
C266R047	---NA---	4.93141	4.87026	0	-	-	-	-	-
C234R115	g-protein-signaling modulator 2 isoform x2	4.87533	4.00092	50	4.6e-83	0.7882	3	F:GDP-dissociation inhibitor activity; P:regulation of G-protein coupled receptor protein signaling pathway; P:regulation of catalytic activity	-
C193R026	annexin a13-like	4.85846	4.5879	50	0	0.9036	2	F:calcium ion binding; F:calcium-dependent phospholipid binding	-
C149R149	---NA---	4.83439	4.48052	0	-	-	-	-	-
C181R096	p2y purinoceptor 1-like	4.82936	4.48104	50	1.4e-116	0.7842	6	C:integral component of membrane; F:G-protein coupled receptor activity; F:kinase activity; P:carbohydrate metabolic process; P:G-protein coupled receptor signaling pathway; P:phosphorylation	-
C163R125	serine threonine-protein kinase pim-1	4.821	3.92538	50	2e-115	0.8244	16	C:cytoplasm; C:membrane; F:protein serine/threonine kinase activity; F:ATP binding; F:transcription factor binding; F:manganese ion binding; F:ribosomal small subunit binding; P:optokinetic behavior; P:cell proliferation; P:hemopoiesis; P:positive regulation of cyclin-dependent protein serine/threonine kinase activity involved in G1/S transition of mitotic cell cycle; P:negative regulation of apo…	-
C053R054	zinc finger protein 710-like isoform x1	4.8121	3.5247	50	0	0.7894	5	C:nucleus; F:nucleic acid binding; F:transcription cofactor activity; F:metal ion binding; P:regulation of transcription from RNA polymerase II promoter	-
C103R085	e3 ubiquitin-protein ligase trim21-like	4.78107	6.36209	50	5.3e-31	0.8812	5	C:cytoplasm; F:zinc ion binding; F:ligase activity; F:ubiquitin protein ligase activity; P:protein ubiquitination	-
C134R151	rhombotin-2	4.70491	4.67835	50	1e-107	0.9682	18	C:nucleus; C:transcription factor complex; F:RNA polymerase II regulatory region sequence-specific DNA binding; F:RNA polymerase II activating transcription factor binding; F:transcriptional activator activity, RNA polymerase II transcription factor binding; F:transcriptional activator activity, RNA polymerase II transcription regulatory region sequence-specific binding; F:chromatin binding; F:zi…	-
C048R147	---NA---	4.70328	5.12659	0	-	-	-	-	-
C202R068	gram domain-containing protein 3-like	4.64335	4.09397	50	0	0.7586	-	-	-
C147R136	mitochondrial antiviral-signaling protein	4.63692	5.09942	35	1.7e-96	0.6286	2	F:signal transducer activity; P:signal transduction	-
C257R076	e3 isg15--protein ligase partial	4.56358	4.00185	50	1.2e-75	0.7846	7	C:cytoplasm; C:integral component of membrane; F:ubiquitin-protein transferase activity; F:GTP binding; F:hydrolase activity; F:ligase activity; P:protein ubiquitination involved in ubiquitin-dependent protein catabolic process	-
C040R055	adp-ribosylation factor-like protein 5b	4.55937	5.18496	50	6.2e-125	0.8878	4	C:intracellular; F:GTP binding; P:intracellular protein transport; P:small GTPase mediated signal transduction	-
C087R168	mitogen-activated protein kinase kinase kinase 8	4.52056	4.19208	50	5e-119	0.8254	9	C:cytoplasm; F:protein serine/threonine kinase activity; F:ATP binding; F:metal ion binding; P:regulation of mitotic cell cycle; P:signal transduction by protein phosphorylation; P:stress-activated protein kinase signaling cascade; P:activation of protein kinase activity; P:regulation of apoptotic process	-
C245R116	ox-2 membrane glyco	4.52003	4.45009	50	8.8e-159	0.601	2	C:integral component of membrane; F:protein binding	-
C102R169	probable e3 ubiquitin-protein ligase ari5	4.5169	4.28363	50	4.2e-143	0.7882	5	F:nucleic acid binding; F:ubiquitin-protein transferase activity; F:zinc ion binding; F:ligase activity; P:protein ubiquitination	-
C184R085	---NA---	4.48156	3.18693	0	-	-	-	-	-
C127R164	zinc-binding protein a33-like	4.46915	4.06193	50	6.5e-72	0.6438	3	C:intracellular; F:protein binding; F:zinc ion binding	-
C022R023	suppressor of cytokine signaling 1	4.45266	3.8344	50	8.6e-116	0.7406	14	C:cytoplasm; F:protein kinase inhibitor activity; F:protein kinase binding; F:STAT family protein binding; F:SOCS family protein binding; P:protein ubiquitination; P:embryonic hemopoiesis; P:negative regulation of insulin receptor signaling pathway; P:regulation of peptidyl-tyrosine phosphorylation; P:retina morphogenesis in camera-type eye; P:negative regulation of interferon-gamma-mediated sign…	-
C188R044	syndecan-4-like isoform x1	4.39948	4.21831	50	9.3e-100	0.6834	10	C:focal adhesion; C:integral component of membrane; F:phosphatidylinositol-4,5-bisphosphate binding; P:cell migration; P:cell adhesion mediated by integrin; P:wound healing; P:stress fiber assembly; P:positive regulation of biological process; P:regulation of cellular process; P:epiboly involved in gastrulation with mouth forming second	-
C083R050	mediator of rna polymerase ii transcription subunit 30	4.37313	3.78205	50	1.8e-95	0.8864	9	C:mediator complex; F:RNA polymerase II transcription cofactor activity; F:receptor activity; F:thyroid hormone receptor binding; P:regulation of transcription from RNA polymerase II promoter; P:transcription initiation from RNA polymerase II promoter; P:stem cell population maintenance; P:androgen receptor signaling pathway; P:positive regulation of transcription, DNA-templated	-
C053R158	rhombotin-2	4.358	4.07274	50	2.7e-105	0.9682	18	C:nucleus; C:transcription factor complex; F:RNA polymerase II regulatory region sequence-specific DNA binding; F:RNA polymerase II activating transcription factor binding; F:transcriptional activator activity, RNA polymerase II transcription factor binding; F:transcriptional activator activity, RNA polymerase II transcription regulatory region sequence-specific binding; F:chromatin binding; F:zi…	-
C068R094	b-cell receptor cd22-like	4.31741	5.91687	50	3.9e-135	0.5646	1	F:protein binding	-
C200R163	syndecan-4-like isoform x1	4.31293	4.38021	50	9.3e-100	0.6834	10	C:focal adhesion; C:integral component of membrane; F:phosphatidylinositol-4,5-bisphosphate binding; P:cell migration; P:cell adhesion mediated by integrin; P:wound healing; P:stress fiber assembly; P:positive regulation of biological process; P:regulation of cellular process; P:epiboly involved in gastrulation with mouth forming second	-
C019R066	basic leucine zipper transcriptional factor atf-like 3	4.30496	3.48905	50	3.4e-70	0.7554	5	C:nucleus; F:transcription factor activity, sequence-specific DNA binding; F:sequence-specific DNA binding; P:regulation of transcription from RNA polymerase II promoter; P:dendritic cell differentiation	-
C224R026	serta domain-containing protein 2	4.29552	3.19504	50	7.5e-42	0.7344	6	C:nucleus; C:cytoplasm; F:transcription coactivator activity; F:protein binding; P:negative regulation of cell growth; P:positive regulation of transcription, DNA-templated	-
C186R096	chemokine xc receptor 1-like	4.29403	4.40813	50	2.7e-40	0.666	5	C:integral component of membrane; F:chemokine receptor activity; P:chemotaxis; P:G-protein coupled receptor signaling pathway; P:chemokine-mediated signaling pathway	-
C213R130	---NA---	4.27424	4.88322	0	-	-	-	-	-
C077R073	probable e3 ubiquitin-protein ligase herc6	4.25601	3.97375	50	3.5e-101	0.7576	3	F:ubiquitin-protein transferase activity; F:ligase activity; P:protein ubiquitination	-
C150R157	dihydrofolate reductase	4.2452	4.3585	50	2.9e-131	0.8302	22	F:mRNA binding; F:dihydrofolate reductase activity; F:folic acid binding; F:methotrexate binding; F:dihydrofolic acid binding; F:NADPH binding; P:heart looping; P:bulbus arteriosus development; P:glycine biosynthetic process; P:tetrahydrobiopterin biosynthetic process; P:one-carbon metabolic process; P:nucleotide biosynthetic process; P:axon regeneration; P:response to methotrexate; P:response to…	-
C239R108	glyoxylate reductase hydroxypyruvate reductase-like	4.23149	3.9381	50	0	0.7718	5	C:cytosol; F:hydroxypyruvate reductase activity; F:glyoxylate reductase (NADP) activity; F:NAD binding; P:oxidation-reduction process	-
C216R078	radical s-adenosyl methionine domain-containing protein 2	4.16986	4.39542	50	0	0.8728	16	C:mitochondrial outer membrane; C:mitochondrial inner membrane; C:endoplasmic reticulum membrane; C:lipid particle; F:catalytic activity; F:protein self-association; F:metal ion binding; F:4 iron, 4 sulfur cluster binding; P:metabolic process; P:positive regulation of toll-like receptor 7 signaling pathway; P:positive regulation of toll-like receptor 9 signaling pathway; P:CD4-positive, alpha-bet…	-
C066R133	cmrf35-like molecule 1	4.16457	5.81589	7	3.1e-21	0.6543	-	-	-
C129R056	sushi domain-containing protein 6	4.14489	4.07039	50	1.6e-162	0.6662	5	F:molecular_function; P:biological_process; C:cellular_component; P:cellular response to DNA damage stimulus; P:cell death	-
C029R155	---NA---	4.12387	4.80044	0	-	-	-	-	-
C234R026	cytoplasmic phosphatidylinositol transfer protein partial	4.11103	3.47537	50	1.2e-61	0.8398	2	C:intracellular; P:transport	-
C190R056	b-cell linker protein	4.09397	3.68075	50	0	0.5792	4	C:cell part; P:single-organism cellular process; P:regulation of cellular process; P:response to stimulus	-
C195R164	dna topoisomerase 1	4.05631	3.32649	50	3.7e-136	0.9786	21	C:cytoplasmic mRNA processing body; C:nucleoplasm; C:nucleolus; C:replication fork protection complex; C:perikaryon; F:core promoter sequence-specific DNA binding; F:chromatin binding; F:DNA topoisomerase type I activity; F:DNA topoisomerase type II (ATP-hydrolyzing) activity; F:protein binding; F:poly(A) RNA binding; P:DNA replication; P:DNA topological change; P:chromatin remodeling; P:chromoso…	-
C248R063	---NA---	4.05209	4.01806	0	-	-	-	-	-
C189R021	e3 ubiquitin-protein ligase rnf8 isoform x2	4.03994	3.39992	50	1.1e-66	0.9108	28	C:ubiquitin ligase complex; C:chromosome, telomeric region; C:nucleus; C:site of double-strand break; F:chromatin binding; F:ubiquitin-protein transferase activity; F:zinc ion binding; F:UDP-N-acetylmuramoylalanyl-D-glutamyl-2,6-diaminopimelate-D-alanyl-D-alanine ligase activity; F:ribosomal S6-glutamic acid ligase activity; F:histone binding; F:protein homodimerization activity; F:coenzyme F420-…	-
C075R064	derlin-2	4.03248	3.82157	50	3.5e-146	0.9066	10	C:early endosome; C:late endosome; C:integral component of endoplasmic reticulum membrane; P:suckling behavior; P:positive regulation of cell proliferation; P:protein N-linked glycosylation via asparagine; P:positive regulation of cell growth; P:ER-associated ubiquitin-dependent protein catabolic process; P:endoplasmic reticulum unfolded protein response; P:negative regulation of retrograde prote…	-
C227R075	coiled-coil domain-containing protein 85b	4.0176	4.47587	33	3.7e-40	0.9239	1	P:neural tube closure	-
C037R124	glutamine-rich protein 2	4.01713	4.43315	50	4e-57	0.492	3	P:oxidation-reduction process; F:oxidoreductase activity; F:copper ion binding	-
C200R150	---NA---	3.99169	4.98813	0	-	-	-	-	-
C035R068	transcription factor maf	3.93674	2.674	50	4.7e-68	0.9376	11	C:nucleus; C:cytoplasm; F:transcriptional activator activity, RNA polymerase II transcription regulatory region sequence-specific binding; F:sequence-specific DNA binding; P:negative regulation of transcription from RNA polymerase II promoter; P:cytokine production; P:regulation of chondrocyte differentiation; P:positive regulation of transcription from RNA polymerase II promoter; P:cell developm…	-
C015R089	---NA---	3.93401	2.53972	0	-	-	-	-	-
C139R167	ribonuclease p protein subunit p21	3.93128	3.99908	50	5.7e-111	0.809	5	C:nucleolar ribonuclease P complex; F:ribonuclease P activity; P:tRNA 5'-leader removal; P:response to drug; P:RNA phosphodiester bond hydrolysis, endonucleolytic	-
C204R157	---NA---	3.91587	4.74695	0	-	-	-	-	-
C024R134	c-c motif chemokine 24	3.89602	3.49268	50	5.4e-45	0.6696	13	C:extracellular region; F:protein kinase activity; F:ATP binding; F:chemokine activity; F:CCR1 chemokine receptor binding; P:protein phosphorylation; P:immune response; P:cytoskeleton organization; P:signal transduction; P:regulation of cell shape; P:eosinophil chemotaxis; P:cellular response to cytokine stimulus; P:positive regulation of natural killer cell chemotaxis	-
C259R079	inhibitor of nuclear factor kappa-b kinase subunit alpha-like	3.89287	3.97008	50	2e-73	0.7848	25	C:nucleus; C:cytosol; C:cytoplasmic side of plasma membrane; C:CD40 receptor complex; F:receptor signaling protein serine/threonine kinase activity; F:ATP binding; F:IkappaB kinase activity; F:protein homodimerization activity; F:protein heterodimerization activity; P:somite specification; P:I-kappaB phosphorylation; P:central nervous system development; P:lactation; P:signal transduction by prot…	-
C071R101	phosphoenolpyruvate carboxykinase	3.8803	4.4857	50	0	0.9154	9	C:mitochondrion; C:extracellular exosome; F:phosphoenolpyruvate carboxykinase (ATP) activity; F:phosphoenolpyruvate carboxykinase (GTP) activity; F:GTP binding; F:kinase activity; P:gluconeogenesis; P:response to glucose; P:phosphorylation	-
C154R165	cyclin-dependent kinase 4 inhibitor b	3.8794	5.00603	50	1.4e-79	0.812	17	C:nucleus; C:cytoplasm; C:proteasome regulatory particle, base subcomplex; F:cyclin-dependent protein serine/threonine kinase inhibitor activity; F:kinase activity; F:protein kinase binding; P:regulation of cyclin-dependent protein serine/threonine kinase activity; P:G2/M transition of mitotic cell cycle; P:cell cycle arrest; P:mitotic cell cycle checkpoint; P:megakaryocyte differentiation; P:pos…	-
C147R162	zinc finger mynd domain-containing protein 15	3.87045	3.41922	50	6.2e-116	0.6448	10	F:metal ion binding; C:cytoplasm; P:spermatid development; P:negative regulation of transcription, DNA-templated; F:histone deacetylase binding; C:nucleus; P:spermatogenesis; P:cell differentiation; P:regulation of transcription, DNA-templated; P:transcription, DNA-templated	-
C071R082	cd226 antigen	3.86732	4.05631	50	0	0.6324	5	C:plasma membrane part; F:receptor binding; F:cell adhesion molecule binding; P:positive regulation of natural killer cell mediated cytotoxicity; P:cell-cell adhesion via plasma-membrane adhesion molecules	-
C080R079	cyclin-dependent kinase 4 inhibitor b	3.85305	5.16941	50	1.4e-79	0.812	17	C:nucleus; C:cytoplasm; C:proteasome regulatory particle, base subcomplex; F:cyclin-dependent protein serine/threonine kinase inhibitor activity; F:kinase activity; F:protein kinase binding; P:regulation of cyclin-dependent protein serine/threonine kinase activity; P:G2/M transition of mitotic cell cycle; P:cell cycle arrest; P:mitotic cell cycle checkpoint; P:megakaryocyte differentiation; P:pos…	-
C178R060	ctd small phosphatase-like protein 2	3.8446	4.27868	50	0	0.7568	8	C:nucleus; F:protein tyrosine/serine/threonine phosphatase activity; F:inositol bisphosphate phosphatase activity; F:inositol tetrakisphosphate phosphatase activity; F:phosphatidylinositol phosphate phosphatase activity; P:protein dephosphorylation; P:negative regulation of BMP signaling pathway; P:positive regulation of protein export from nucleus	-
C021R082	cyclin-dependent kinase 4 inhibitor b	3.83883	5.17658	50	1.4e-79	0.812	17	C:nucleus; C:cytoplasm; C:proteasome regulatory particle, base subcomplex; F:cyclin-dependent protein serine/threonine kinase inhibitor activity; F:kinase activity; F:protein kinase binding; P:regulation of cyclin-dependent protein serine/threonine kinase activity; P:G2/M transition of mitotic cell cycle; P:cell cycle arrest; P:mitotic cell cycle checkpoint; P:megakaryocyte differentiation; P:pos…	-
C100R123	nadh-cytochrome b5 reductase 3-like	3.8375	3.48059	50	8.6e-29	0.8726	8	C:mitochondrion; C:integral component of membrane; C:extracellular exosome; F:cytochrome-b5 reductase activity, acting on NAD(P)H; F:protein binding; P:sterol biosynthetic process; P:oxidation-reduction process; P:positive regulation of protein targeting to mitochondrion	-
C002R151	c-terminal-binding protein 1 isoform x1	3.83351	3.59585	50	0	0.9382	46	C:nucleoplasm; C:transcription factor complex; C:cytoplasm; C:transcriptional repressor complex; F:C-3 sterol dehydrogenase (C-4 sterol decarboxylase) activity; F:RNA polymerase II transcription corepressor activity; F:transcription factor activity, sequence-specific DNA binding; F:isocitrate dehydrogenase activity; F:mevaldate reductase activity; F:protein C-terminus binding; F:gluconate dehydro…	-
C101R015	---NA---	3.81231	3.51819	0	-	-	-	-	-
C117R011	heme utilization protein	3.7886	2.94718	50	1.1e-24	0.5558	3	P:microtubule cytoskeleton organization; F:microtubule binding; C:microtubule	-
C096R155	---NA---	3.78117	3.45017	0	-	-	-	-	-
C264R147	b-cell lymphoma 3 protein	3.7399	4.3339	50	2.6e-139	0.7658	36	C:nucleoplasm; C:Bcl3-Bcl10 complex; C:Bcl3/NF-kappaB2 complex; C:intercellular bridge; C:perinuclear region of cytoplasm; F:DNA binding; F:transcription factor activity, sequence-specific DNA binding; F:transcription factor binding; F:protein binding, bridging; P:protein import into nucleus, translocation; P:follicular dendritic cell differentiation; P:marginal zone B cell differentiation; P:hum…	-
C253R047	---NA---	3.73904	4.27127	0	-	-	-	-	-
C202R050	hemicentin-1-like	3.73817	3.18509	50	1.9e-179	0.6434	4	C:membrane; F:protein binding; P:ion transport; P:single organismal cell-cell adhesion	-
C067R118	tpa-induced transmembrane protein	3.70807	4.56042	50	4.1e-67	0.586	1	C:integral component of membrane	-
C054R167	glucose-dependent partial	3.70764	3.48824	12	9.7e-12	0.5158	-	-	-
C211R046	casp8 and fadd-like apoptosis regulator isoform x1	3.70036	4.05209	50	8.8e-98	0.6956	13	C:death-inducing signaling complex; C:ripoptosome; F:protease binding; F:cysteine-type endopeptidase activity; F:enzyme activator activity; P:tissue development; P:positive regulation of I-kappaB kinase/NF-kappaB signaling; P:negative regulation of cysteine-type endopeptidase activity involved in apoptotic process; P:single-multicellular organism process; P:regulation of necroptotic process; P:mu…	-
C122R162	vesicle-associated membrane protein 5-like	3.67353	4.0241	50	4.7e-50	0.7936	17	C:late endosome; C:trans-Golgi network; C:integral component of plasma membrane; C:synaptic vesicle; C:cell surface; C:intercalated disc; C:cytoplasmic vesicle membrane; C:SNARE complex; C:integral component of organelle membrane; C:perinuclear region of cytoplasm; C:extracellular exosome; F:SNARE binding; F:SNAP receptor activity; P:exocytosis; P:vesicle fusion; P:skeletal muscle tissue developm…	-
C142R159	nuclear body protein sp140-like protein	3.64605	3.66886	50	1.2e-162	0.6718	8	C:nucleus; C:cytoplasm; F:DNA binding; F:protein binding; F:zinc ion binding; F:translation regulator activity; P:regulation of translation; P:humoral immune response	-
C227R135	tripartite motif-containing protein 35-like	3.63511	3.76896	50	2.1e-120	0.6612	2	C:intracellular; F:zinc ion binding	-
C078R082	trimeric intracellular cation channel type b	3.59751	3.62044	50	0	0.7854	4	C:endoplasmic reticulum membrane; C:integral component of membrane; F:potassium channel activity; P:potassium ion transmembrane transport	-
C213R054	cyclin-dependent kinase 4 inhibitor b	3.5971	4.64067	50	1.4e-79	0.812	17	C:nucleus; C:cytoplasm; C:proteasome regulatory particle, base subcomplex; F:cyclin-dependent protein serine/threonine kinase inhibitor activity; F:kinase activity; F:protein kinase binding; P:regulation of cyclin-dependent protein serine/threonine kinase activity; P:G2/M transition of mitotic cell cycle; P:cell cycle arrest; P:mitotic cell cycle checkpoint; P:megakaryocyte differentiation; P:pos…	-
C085R169	nectin-2-like isoform x2	3.59128	3.54471	13	7.3e-22	0.5254	-	-	-
C103R050	zinc finger ccch domain-containing protein 15	3.58217	3.28562	50	2e-155	0.8692	10	C:nucleolus; C:cytoplasm; C:proton-transporting ATP synthase complex, coupling factor F(o); F:protein binding; F:hydrogen ion transmembrane transporter activity; F:poly(A) RNA binding; F:metal ion binding; P:ATP synthesis coupled proton transport; P:ATP hydrolysis coupled proton transport; P:cytokine-mediated signaling pathway	-
C089R103	fragile x mental retardation protein 1 isoform x1	3.55414	3.39246	50	7.6e-50	0.901	24	C:nucleoplasm; C:nucleolus; C:mRNA cap binding complex; C:microtubule; C:cytoplasmic stress granule; C:membrane; C:axon; C:polysomal ribosome; C:dendritic spine; C:dendritic shaft; C:cell body; C:neuronal ribonucleoprotein granule; F:mRNA binding; F:microtubule binding; P:brain development; P:neural crest cell fate specification; P:forebrain-midbrain boundary formation; P:negative regulation of t…	-
C233R097	hypothetical loc798684	3.53408	4.00786	20	3.5e-74	0.7505	6	C:nucleus; F:nucleotide binding; F:actin binding; F:catalytic activity; F:zinc ion binding; P:mRNA processing	-
C238R070	rho gtpase-activating protein 27-like isoform x1	3.50926	3.22918	50	1.2e-130	0.8994	1	P:signal transduction	-
C111R007	suppressor of cytokine signaling 3	3.50683	2.96185	50	8.6e-110	0.7836	11	C:cytoplasm; F:protein kinase inhibitor activity; P:protein ubiquitination; P:cytokine-mediated signaling pathway; P:posterior lateral line neuromast hair cell development; P:negative regulation of apoptotic process; P:negative regulation of JAK-STAT cascade; P:negative regulation of insulin receptor signaling pathway; P:negative regulation of axon regeneration; P:retina morphogenesis in camera-t…	-
C198R119	at-rich interactive domain-containing protein 5a-like	3.50602	3.19467	32	1.1e-180	0.5697	1	F:DNA binding	-
C032R085	dual specificity protein phosphatase 5	3.48341	3.75505	50	6.6e-129	0.7742	5	F:protein tyrosine phosphatase activity; F:MAP kinase tyrosine/serine/threonine phosphatase activity; P:inactivation of MAPK activity; P:endoderm formation; P:peptidyl-tyrosine dephosphorylation	-
C260R086	b-cell linker protein	3.4818	3.09156	50	0	0.5946	4	C:cell part; P:single-organism cellular process; P:regulation of cellular process; P:response to stimulus	-
C164R017	---NA---	3.47939	3.61292	0	-	-	-	-	-
C079R017	unnamed protein product	3.46055	3.11162	1	5.4e-12	0.7	3	F:structural constituent of ribosome; P:translation; C:ribosome	-
C111R093	probable e3 ubiquitin-protein ligase ari5	3.44857	3.17737	50	4.9e-79	0.6972	2	F:catalytic activity; F:metal ion binding	-
C206R024	dihydrofolate reductase	3.43307	3.72524	50	4.7e-138	0.8318	22	F:mRNA binding; F:dihydrofolate reductase activity; F:folic acid binding; F:methotrexate binding; F:dihydrofolic acid binding; F:NADPH binding; P:heart looping; P:bulbus arteriosus development; P:glycine biosynthetic process; P:tetrahydrobiopterin biosynthetic process; P:one-carbon metabolic process; P:nucleotide biosynthetic process; P:axon regeneration; P:response to methotrexate; P:response to…	-
C005R104	magnesium transporter mrs2 mitochondrial	3.4303	4	50	0	0.885	3	C:mitochondrion; F:magnesium ion transmembrane transporter activity; P:magnesium ion transport	-
C102R110	uridine-cytidine kinase-like 1 isoform x2	3.42792	3.1282	50	1.9e-161	0.9848	5	F:uridine kinase activity; F:ATP binding; P:phosphorylation; P:UMP salvage; P:CTP salvage	-
C166R144	dual specificity protein phosphatase partial	3.40739	2.90492	50	1.6e-71	0.6776	3	F:protein tyrosine phosphatase activity; F:protein tyrosine/serine/threonine phosphatase activity; P:peptidyl-tyrosine dephosphorylation	-
C225R164	---NA---	3.40542	3.41764	0	-	-	-	-	-
C083R028	ets translocation variant 4	3.38737	3.09907	50	1.5e-166	0.8274	9	C:nucleus; F:RNA polymerase II transcription factor activity, sequence-specific DNA binding; F:sequence-specific DNA binding; P:regulation of transcription from RNA polymerase II promoter; P:cell differentiation; P:limb morphogenesis; P:positive regulation of transcription, DNA-templated; P:pronephros development; P:regulation of multicellular organismal development	-
C198R077	c-terminal-binding protein 1 isoform x1	3.38346	2.84843	50	0	0.9382	46	C:nucleoplasm; C:transcription factor complex; C:cytoplasm; C:transcriptional repressor complex; F:C-3 sterol dehydrogenase (C-4 sterol decarboxylase) activity; F:RNA polymerase II transcription corepressor activity; F:transcription factor activity, sequence-specific DNA binding; F:isocitrate dehydrogenase activity; F:mevaldate reductase activity; F:protein C-terminus binding; F:gluconate dehydro…	-
C015R087	unnamed protein product	3.37253	4.11864	1	1.4e-07	0.96	2	F:kinase binding; P:neuron projection morphogenesis	-
C144R151	cytohesin-interacting protein	3.36164	2.7057	50	0	0.6768	2	C:cytoplasm; F:protein binding	-
C174R091	transmembrane protein 184a	3.35505	3.35272	50	0	0.8752	1	C:integral component of membrane	-
C193R062	mitochondrial glutamate carrier 1-like	3.33457	2.30644	50	7.7e-178	0.9	4	C:mitochondrial inner membrane; C:integral component of membrane; F:L-glutamate transmembrane transporter activity; P:transmembrane transport	-
C057R041	proheparin-binding egf-like growth factor	3.32111	4.02596	50	9.4e-110	0.723	14	C:extracellular space; C:plasma membrane; C:integral component of membrane; F:epidermal growth factor receptor binding; F:growth factor activity; P:epidermal growth factor receptor signaling pathway; P:positive regulation of cell proliferation; P:cranial nerve development; P:positive regulation of cell migration; P:positive regulation of response to stimulus; P:regulation of multicellular organis…	-
C215R144	palmitoyltransferase zdhhc3	3.31077	3.08015	50	2.7e-36	0.9094	7	C:endoplasmic reticulum; C:Golgi apparatus; C:integral component of membrane; F:zinc ion binding; F:protein-cysteine S-palmitoyltransferase activity; P:protein targeting to membrane; P:peptidyl-L-cysteine S-palmitoylation	-
C005R149	guanine nucleotide-binding protein g subunit alpha isoform x2	3.30008	3.73256	50	2.8e-42	0.9686	54	C:ruffle; C:nucleus; C:cytosol; C:heterotrimeric G-protein complex; C:transport vesicle; C:dendrite; C:intrinsic component of membrane; C:trans-Golgi network membrane; C:perinuclear region of cytoplasm; C:extracellular exosome; F:GTPase activity; F:adenylate cyclase activity; F:signal transducer activity; F:insulin-like growth factor receptor binding; F:GTP binding; F:G-protein beta/gamma-subunit…	-
C225R042	---NA---	3.29817	2.85337	0	-	-	-	-	-
C070R014	gtpase imap family member 7-like	3.28183	3.19061	50	1.4e-148	0.7652	1	F:GTP binding	-
C154R026	g-protein coupled receptor 4	3.27728	2.44613	50	0	0.8594	3	C:integral component of plasma membrane; F:G-protein coupled receptor activity; P:G-protein coupled receptor signaling pathway	-
C002R093	cyclin-dependent kinase 4 inhibitor b	3.26104	7.0088	50	1.4e-42	0.7626	8	C:nucleus; C:cytoplasm; C:proteasome regulatory particle, base subcomplex; F:protein binding; F:kinase activity; P:phosphorylation; P:positive regulation of proteasomal ubiquitin-dependent protein catabolic process; P:proteasome regulatory particle assembly	-
C235R092	transcription initiation factor iib	3.26029	3.26708	50	1.7e-172	0.9728	12	C:nucleoplasm; C:nucleolus; F:core promoter binding; F:translation initiation factor activity; F:zinc ion binding; F:TBP-class protein binding; F:thyroid hormone receptor binding; P:regulation of transcription, DNA-templated; P:transcription initiation from RNA polymerase II promoter; P:transcription elongation from RNA polymerase II promoter; P:translational initiation; P:viral process	-
C208R010	serine incorporator 5	3.25916	2.81832	50	1.8e-103	0.8384	11	C:endoplasmic reticulum membrane; C:Golgi apparatus; C:integral component of membrane; C:myelin sheath; C:extracellular exosome; F:L-serine transmembrane transporter activity; P:phosphatidylserine metabolic process; P:sphingolipid metabolic process; P:phospholipid biosynthetic process; P:L-serine transport; P:myelination	-
C004R084	tripartite motif-containing protein 35-like	3.25615	2.36171	50	4.8e-49	0.5794	3	C:intracellular; F:protein binding; F:zinc ion binding	-
C027R043	hepatitis a virus cellular receptor 1 homolog	3.24976	4.3575	50	2.6e-116	0.6554	1	F:protein binding	-
C020R107	unnamed protein product	3.24863	2.98625	50	2.3e-113	0.8418	5	C:nucleus; F:sequence-specific DNA binding; P:sprouting angiogenesis; P:regulation of transcription, DNA-templated; P:cell differentiation in spinal cord	-
C210R145	transcription initiation factor iib	3.24676	3.29018	50	1.2e-39	0.97	12	C:nucleoplasm; C:nucleolus; F:core promoter binding; F:translation initiation factor activity; F:zinc ion binding; F:TBP-class protein binding; F:thyroid hormone receptor binding; P:regulation of transcription, DNA-templated; P:transcription initiation from RNA polymerase II promoter; P:transcription elongation from RNA polymerase II promoter; P:translational initiation; P:viral process	-
C112R096	dna topoisomerase 1	3.23964	3.36359	50	3.7e-136	0.9786	21	C:cytoplasmic mRNA processing body; C:nucleoplasm; C:nucleolus; C:replication fork protection complex; C:perikaryon; F:core promoter sequence-specific DNA binding; F:chromatin binding; F:DNA topoisomerase type I activity; F:DNA topoisomerase type II (ATP-hydrolyzing) activity; F:protein binding; F:poly(A) RNA binding; P:DNA replication; P:DNA topological change; P:chromatin remodeling; P:chromoso…	-
C037R113	proheparin-binding egf-like growth factor	3.22284	4.26782	50	1.3e-73	0.6624	14	C:extracellular space; C:integral component of plasma membrane; F:epidermal growth factor receptor binding; F:growth factor activity; F:heparin binding; P:epidermal growth factor receptor signaling pathway; P:positive regulation of cell proliferation; P:cranial nerve development; P:positive regulation of cell migration; P:positive regulation of response to stimulus; P:regulation of multicellular …	-
C113R016	ubiquitin thioesterase otub2	3.21503	2.90325	50	1.7e-163	0.7486	7	C:nucleus; F:ubiquitin-specific protease activity; F:NEDD8-specific protease activity; F:ubiquitin binding; P:protein K11-linked deubiquitination; P:protein K63-linked deubiquitination; P:protein K48-linked deubiquitination	-
C071R046	c-x-c chemokine receptor type 3-like	3.20872	2.91097	50	0	0.7284	8	C:integral component of membrane; F:C-X-C chemokine receptor activity; P:regulation of leukocyte migration; P:chemotaxis; P:inflammatory response; P:G-protein coupled receptor signaling pathway; P:neutrophil activation; P:chemokine-mediated signaling pathway	-
C157R092	unnamed protein product	3.20058	3.38659	1	1e-12	0.8	-	-	-
C169R049	insulin-like growth factor-binding protein 6	3.1991	2.71854	50	9.1e-44	0.823	5	C:extracellular space; F:insulin-like growth factor I binding; F:insulin-like growth factor II binding; P:regulation of cell growth; P:regulation of insulin-like growth factor receptor signaling pathway	-
C073R084	---NA---	3.19541	3.17187	0	-	-	-	-	-
C260R085	dna topoisomerase 1	3.19541	3.03389	50	3.7e-136	0.9786	21	C:cytoplasmic mRNA processing body; C:nucleoplasm; C:nucleolus; C:replication fork protection complex; C:perikaryon; F:core promoter sequence-specific DNA binding; F:chromatin binding; F:DNA topoisomerase type I activity; F:DNA topoisomerase type II (ATP-hydrolyzing) activity; F:protein binding; F:poly(A) RNA binding; P:DNA replication; P:DNA topological change; P:chromatin remodeling; P:chromoso…	-
C023R156	transcription initiation factor iib	3.18031	3.36126	50	0	0.9772	12	C:nucleoplasm; C:nucleolus; F:core promoter binding; F:translation initiation factor activity; F:zinc ion binding; F:TBP-class protein binding; F:thyroid hormone receptor binding; P:regulation of transcription, DNA-templated; P:transcription initiation from RNA polymerase II promoter; P:transcription elongation from RNA polymerase II promoter; P:translational initiation; P:viral process	-
C008R128	methyl-CpG-binding domain protein 2	3.17994	4.13485	50	1.9e-51	0.8698	19	C:histone deacetylase complex; C:nuclear chromatin; C:heterochromatin; C:cytoplasm; F:RNA polymerase II core promoter proximal region sequence-specific DNA binding; F:RNA polymerase II distal enhancer sequence-specific DNA binding; F:satellite DNA binding; F:mRNA binding; F:methyl-CpG binding; F:nucleosomal DNA binding; F:siRNA binding; F:C2H2 zinc finger domain binding; P:negative regulation of …	-
C084R139	rhombotin-2	3.17884	3.44658	50	4e-105	0.9784	18	C:nucleus; C:transcription factor complex; F:RNA polymerase II regulatory region sequence-specific DNA binding; F:RNA polymerase II activating transcription factor binding; F:transcriptional activator activity, RNA polymerase II transcription factor binding; F:transcriptional activator activity, RNA polymerase II transcription regulatory region sequence-specific binding; F:chromatin binding; F:zi…	-
C205R149	interferon-induced protein 44-like	3.1781	4.02085	50	3.9e-80	0.6898	1	F:GTP binding	-
C019R079	phospholipid scramblase 3	3.17297	3.47537	50	7e-135	0.8824	3	C:plasma membrane; F:phospholipid scramblase activity; P:phospholipid scrambling	-
C240R132	pituitary tumor-transforming gene 1 protein-interacting	3.1726	4.13246	50	1.1e-95	0.7532	1	P:hemopoiesis	-
C209R004	cd209 antigen-like	3.16309	2.17749	50	1.1e-54	0.6062	1	F:carbohydrate binding	-
C084R109	cd209 antigen-like protein e	3.16236	3.14015	50	4.5e-163	0.6088	1	F:carbohydrate binding	-
C101R057	delta-like protein b	3.1456	3.67268	50	0	0.8512	21	C:plasma membrane; C:integral component of membrane; C:perinuclear region of cytoplasm; F:calcium ion binding; F:PDZ domain binding; F:identical protein binding; P:skeletal system development; P:somite specification; P:Notch signaling pathway; P:compartment pattern specification; P:ventral spinal cord interneuron differentiation; P:diencephalon development; P:midbrain development; P:dorsal aorta …	-
C196R135	poly [ADP-ribose] polymerase 14	3.1456	2.37238	50	0	0.683	2	F:nucleotide binding; F:RNA binding	-
C129R156	e3 ubiquitin-protein ligase trim21-like	3.13834	2.55295	50	3.1e-137	0.727	2	C:intracellular; F:zinc ion binding	-
C090R016	polymeric immunoglobulin receptor-like	3.13399	2.77118	50	2.2e-45	0.6324	1	F:protein binding	-
C195R084	zinc finger protein 501-like isoform x1	3.13001	2.7176	50	8.9e-54	0.7244	2	F:nucleic acid binding; F:metal ion binding	-
C090R127	---NA---	3.12026	3.23627	0	-	-	-	-	-
C100R139	---NA---	3.11558	3.01154	0	-	-	-	-	-
C235R042	b-cell linker protein	3.11306	3.15142	50	0	0.5946	4	C:cell part; P:single-organism cellular process; P:regulation of cellular process; P:response to stimulus	-
C126R150	---NA---	3.10731	2.05956	0	-	-	-	-	-
C177R094	insulin-like growth factor-binding protein 5	3.10623	2.79207	50	5.2e-111	0.7884	5	C:extracellular space; F:insulin-like growth factor I binding; F:insulin-like growth factor II binding; P:regulation of cell growth; P:regulation of insulin-like growth factor receptor signaling pathway	-
C063R099	traf-type zinc finger domain-containing protein 1	3.10408	2.8802	50	0	0.6806	1	F:zinc ion binding	-
C092R081	ring finger protein 223	3.1005	3.20687	50	3.7e-82	0.575	1	F:zinc ion binding	-
C051R028	mkl myocardin-like protein 1 isoform x1	3.1005	2.75204	50	1.3e-58	0.7764	5	C:nucleus; C:cytoplasm; F:transcription coactivator activity; F:actin monomer binding; P:positive regulation of transcription via serum response element binding	-
C091R168	interleukin-10 receptor subunit beta-like	3.09907	3.1416	50	0	0.5896	1	F:protein binding	-
C178R094	eh domain-containing protein 1	3.09013	3.27123	50	9.7e-19	0.9426	29	C:lipid particle; C:ribosome; C:ciliary pocket membrane; C:endocytic vesicle; C:platelet dense tubular network membrane; C:early endosome membrane; C:myelin sheath; C:perinuclear region of cytoplasm; C:recycling endosome membrane; C:extracellular exosome; F:structural constituent of ribosome; F:calcium ion binding; F:ATP binding; F:GTP binding; F:Rab GTPase binding; P:translation; P:intracellular…	-
C179R009	---NA---	3.08763	3.23927	0	-	-	-	-	-
C126R005	cd209 antigen-like protein e	3.06312	2.48802	50	4.5e-163	0.6088	1	F:carbohydrate binding	-
C087R017	probable atp-dependent rna helicase dhx58	3.05534	2.9935	50	1.7e-176	0.8262	8	C:perinuclear region of cytoplasm; F:DNA binding; F:double-stranded RNA binding; F:helicase activity; F:ATP binding; P:metabolic process; P:innate immune response; P:immune response involved in response to exogenous dsRNA	-
C164R089	---NA---	3.05534	2.66413	0	-	-	-	-	-
C137R163	dna topoisomerase 1	3.05005	2.86228	50	1e-133	0.8586	22	C:cytoplasmic mRNA processing body; C:nucleoplasm; C:nucleolus; C:viral nucleocapsid; C:replication fork protection complex; C:perikaryon; F:core promoter sequence-specific DNA binding; F:chromatin binding; F:DNA topoisomerase type I activity; F:DNA topoisomerase type II (ATP-hydrolyzing) activity; F:protein binding; F:poly(A) RNA binding; P:DNA replication; P:DNA topological change; P:chromatin …	-
C008R119	---NA---	3.04829	4.61661	0	-	-	-	-	-
C090R105	vesicle-associated membrane protein 5-like	3.04618	2.42587	50	3.2e-47	0.766	17	C:late endosome; C:trans-Golgi network; C:integral component of plasma membrane; C:synaptic vesicle; C:cell surface; C:intercalated disc; C:cytoplasmic vesicle membrane; C:SNARE complex; C:integral component of organelle membrane; C:perinuclear region of cytoplasm; C:extracellular exosome; F:SNARE binding; F:SNAP receptor activity; P:exocytosis; P:vesicle fusion; P:skeletal muscle tissue developm…	-
C077R006	bmp and activin membrane-bound inhibitor homolog	3.04196	2.78627	50	2.2e-168	0.8954	16	C:cytoplasm; C:plasma membrane; C:integral component of membrane; F:frizzled binding; P:positive regulation of cell proliferation; P:regulation of cell shape; P:dorsal/ventral pattern formation; P:positive regulation of epithelial to mesenchymal transition; P:cell migration; P:platelet activation; P:negative regulation of transforming growth factor beta receptor signaling pathway; P:negative regu…	-
C230R041	unnamed protein product	3.03985	2.6805	1	8.8e-41	0.81	2	F:catalytic activity; P:metabolic process	-
C026R158	---NA---	3.03248	3.2554	0	-	-	-	-	-
C111R005	b-cell linker protein	3.03073	3.05499	50	0	0.5946	4	C:cell part; P:single-organism cellular process; P:regulation of cellular process; P:response to stimulus	-
C157R128	---NA---	3.03038	3.7399	0	-	-	-	-	-
C214R062	transmembrane 9 superfamily member 2-like isoform x1	3.02933	2.9935	50	1.8e-72	0.8398	1	C:integral component of membrane	-
C223R168	sterile alpha motif domain-containing protein 9-like	3.02095	2.8353	50	0	0.7352	1	F:protein binding	-
C133R093	---NA---	3.01258	3.0962	0	-	-	-	-	-
C018R043	---NA---	3.0098	3.04372	0	-	-	-	-	-
C127R076	---NA---	3.0098	2.2876	0	-	-	-	-	-
C218R165	3-mercaptopyruvate sulfurtransferase	3.0091	2.94684	50	0	0.819	7	C:mitochondrion; C:integral component of membrane; F:serine-type endopeptidase activity; F:thiosulfate sulfurtransferase activity; F:cytokine receptor activity; P:proteolysis; P:cytokine-mediated signaling pathway	-
C248R004	---NA---	3.00632	3.06135	0	-	-	-	-	-
C155R025	vascular cell adhesion protein 1-like	3.00632	2.91535	50	1.4e-97	0.559	1	F:protein binding	-
C030R134	small kinetochore-associated protein	3.00216	3.09978	25	5.8e-97	0.7064	3	F:molecular_function; P:biological_process; C:cellular_component	-
C053R047	hig1 domain family member mitochondrial	2.998	4.05631	50	3.8e-57	0.852	6	C:nucleus; C:mitochondrial inner membrane; C:integral component of membrane; P:cellular response to glucose starvation; P:cellular response to hypoxia; P:negative regulation of release of cytochrome c from mitochondria	-
C042R064	hydroxypyruvate isomerase	2.99212	2.22736	50	1.4e-177	0.7912	2	F:hydroxypyruvate isomerase activity; P:metabolic process	-
C185R107	complement c1q-like protein 2	2.98625	3.25014	50	3.2e-24	0.6896	1	C:collagen trimer	-
C181R165	shootin-1-like	2.98418	2.65921	50	9.9e-86	0.7198	2	F:kinase binding; P:neuron projection morphogenesis	-
C244R156	adp-ribosylation factor-like protein 5a	2.98383	3.07944	50	1.5e-122	0.984	5	C:intracellular; F:actin binding; F:GTP binding; P:intracellular protein transport; P:small GTPase mediated signal transduction	-
C195R101	cytochrome b ascorbate-dependent protein 3 isoform x1	2.97935	2.83989	50	1.3e-111	0.8156	12	C:lysosomal membrane; C:integral component of membrane; C:late endosome membrane; F:N-ethylmaleimide reductase activity; F:reduced coenzyme F420 dehydrogenase activity; F:sulfur oxygenase reductase activity; F:malolactic enzyme activity; F:NADPH:sulfur oxidoreductase activity; F:metal ion binding; F:epoxyqueuosine reductase activity; P:transport; P:oxidation-reduction process	-
C202R071	lethal malignant brain tumor-like protein 4	2.97523	3.30466	50	3.3e-161	0.6694	5	C:nucleus; F:transcription factor activity, sequence-specific DNA binding; F:protein binding; F:zinc ion binding; P:regulation of transcription, DNA-templated	-
C091R034	nuclear receptor coactivator 4	2.97042	3.43823	50	0	0.6362	2	P:biological_process; C:cellular_component	-
C202R156	---NA---	2.96802	3.46415	0	-	-	-	-	-
C164R047	ubiquitin-conjugating enzyme e2 d3 isoform x1	2.96151	2.91871	50	5.7e-99	0.9874	50	C:euchromatin; C:sex chromatin; C:cytosol; C:plasma membrane; C:endosome membrane; C:nuclear body; C:PRC1 complex; C:extracellular exosome; C:MLL1 complex; F:chromatin binding; F:ubiquitin-specific protease activity; F:ATP binding; F:zinc ion binding; F:ligase activity; F:NEDD8-specific protease activity; F:ubiquitin protein ligase binding; F:ubiquitin binding; F:ubiquitin protein ligase activity…	-
C144R107	vesicle-associated membrane protein 5-like	2.95946	3.15032	50	2.1e-67	0.7934	17	C:late endosome; C:trans-Golgi network; C:integral component of plasma membrane; C:synaptic vesicle; C:cell surface; C:intercalated disc; C:cytoplasmic vesicle membrane; C:SNARE complex; C:integral component of organelle membrane; C:perinuclear region of cytoplasm; C:extracellular exosome; F:SNARE binding; F:SNAP receptor activity; P:exocytosis; P:vesicle fusion; P:skeletal muscle tissue developm…	-
C056R087	deoxycytidine kinase	2.95809	2.8389	50	0	0.8868	18	C:nucleus; C:cytosol; F:magnesium ion binding; F:deoxycytidine kinase activity; F:ATP binding; F:drug binding; F:pyrimidine deoxyribonucleoside binding; F:protein homodimerization activity; P:purine nucleobase metabolic process; P:pyrimidine nucleobase metabolic process; P:pyrimidine nucleotide metabolic process; P:deoxyribonucleoside monophosphate biosynthetic process; P:nucleotide biosynthetic …	-
C114R089	solute carrier family 25 member 35	2.95365	2.61112	50	2e-94	0.8934	3	C:mitochondrial inner membrane; C:integral component of membrane; P:transport	-
C113R020	rhombotin-2	2.94615	2.68235	50	4e-105	0.9784	18	C:nucleus; C:transcription factor complex; F:RNA polymerase II regulatory region sequence-specific DNA binding; F:RNA polymerase II activating transcription factor binding; F:transcriptional activator activity, RNA polymerase II transcription factor binding; F:transcriptional activator activity, RNA polymerase II transcription regulatory region sequence-specific binding; F:chromatin binding; F:zi…	-
C184R167	zinc-binding protein a33-like	2.94343	3.87089	50	1.3e-98	0.6832	2	F:protein binding; F:zinc ion binding	-
C264R040	mitogen-activated protein kinase kinase kinase 8	2.94343	3.47698	50	0	0.8062	8	C:cytoplasm; F:protein serine/threonine kinase activity; F:ATP binding; P:regulation of mitotic cell cycle; P:signal transduction by protein phosphorylation; P:stress-activated protein kinase signaling cascade; P:activation of protein kinase activity; P:regulation of apoptotic process	-
C126R149	---NA---	2.9397	3.05993	0	-	-	-	-	-
C225R033	c-x-c motif chemokine 10-like	2.93868	2.32597	50	4.6e-68	0.6214	7	C:extracellular region; C:cell; F:chemokine activity; F:chemoattractant activity; P:inflammatory response; P:neutrophil chemotaxis; P:neutrophil degranulation	-
C237R143	tbc1 domain family member 17	2.93189	3.21169	50	1.2e-108	0.878	7	C:cytosol; C:cytoplasmic vesicle; F:GTPase activator activity; P:autophagy; P:protein transport; P:retrograde transport, endosome to Golgi; P:regulation of cilium assembly	-
C083R012	microsomal glutathione s-transferase 2	2.93054	3.17737	50	2.1e-89	0.718	8	C:nuclear envelope; C:integral component of membrane; F:glutathione transferase activity; F:leukotriene-C4 synthase activity; F:glutathione peroxidase activity; F:enzyme activator activity; P:leukotriene biosynthetic process; P:positive regulation of catalytic activity	-
C248R040	unnamed protein product	2.91636	2.4886	1	2.7e-06	0.81	-	-	-
C186R092	ubiquitin-conjugating enzyme e2 d3 isoform x1	2.91602	3.03178	50	5.7e-99	0.9874	50	C:euchromatin; C:sex chromatin; C:cytosol; C:plasma membrane; C:endosome membrane; C:nuclear body; C:PRC1 complex; C:extracellular exosome; C:MLL1 complex; F:chromatin binding; F:ubiquitin-specific protease activity; F:ATP binding; F:zinc ion binding; F:ligase activity; F:NEDD8-specific protease activity; F:ubiquitin protein ligase binding; F:ubiquitin binding; F:ubiquitin protein ligase activity…	-
C012R022	reproduction regulator 2	2.91568	2.53327	7	2.7e-10	0.5957	-	-	-
C003R117	nuclear body protein sp140-like protein	2.88752	3.25164	50	1.2e-162	0.6718	8	C:nucleus; C:cytoplasm; F:DNA binding; F:protein binding; F:zinc ion binding; F:translation regulator activity; P:regulation of translation; P:humoral immune response	-
C107R015	fragile x mental retardation protein 1 isoform x1	2.88752	2.50417	50	3.5e-59	0.5918	12	C:nucleus; C:cytoplasm; C:polysome; F:mRNA binding; P:brain development; P:neural crest cell fate specification; P:negative regulation of translation; P:forebrain-midbrain boundary formation; P:branching morphogenesis of a nerve; P:neuron projection morphogenesis; P:cognition; P:cartilage development	-
C203R145	nuclear body protein sp140-like protein isoform x1	2.88086	2.93562	50	5.4e-125	0.5926	7	C:nucleus; C:cytoplasm; F:DNA binding; F:zinc ion binding; F:translation regulator activity; P:regulation of translation; P:humoral immune response	-
C140R076	transcription initiation factor iib	2.88053	2.76287	50	0	0.9772	12	C:nucleoplasm; C:nucleolus; F:core promoter binding; F:translation initiation factor activity; F:zinc ion binding; F:TBP-class protein binding; F:thyroid hormone receptor binding; P:regulation of transcription, DNA-templated; P:transcription initiation from RNA polymerase II promoter; P:transcription elongation from RNA polymerase II promoter; P:translational initiation; P:viral process	-
C121R157	tyrosine-protein kinase tec	2.8802	3.75592	50	8.5e-70	0.8576	64	C:nucleus; C:transcription factor complex; C:cytoskeleton; C:cell-cell junction; C:extrinsic component of cytoplasmic side of plasma membrane; C:mast cell granule; F:RNA polymerase II core promoter proximal region sequence-specific DNA binding; F:core promoter sequence-specific DNA binding; F:transcriptional activator activity, RNA polymerase II core promoter proximal region sequence-specific bin…	-
C135R092	adp-ribosylation factor-like protein 5a	2.87355	3.00841	50	1.5e-122	0.984	5	C:intracellular; F:actin binding; F:GTP binding; P:intracellular protein transport; P:small GTPase mediated signal transduction	-
C169R050	acid sphingomyelinase-like phosphodiesterase 3a	2.87056	2.83464	50	2.2e-107	0.7604	5	C:extracellular space; C:extracellular exosome; F:sphingomyelin phosphodiesterase activity; F:protein binding; P:sphingomyelin catabolic process	-
C142R127	---NA---	2.87056	2.70726	0	-	-	-	-	-
C051R091	b-cell lymphoma 6 protein isoform x2	2.8689	2.47226	50	0	0.6942	12	C:nucleus; F:RNA polymerase II regulatory region sequence-specific DNA binding; F:transcriptional repressor activity, RNA polymerase II transcription regulatory region sequence-specific binding; F:protein binding; F:metal ion binding; P:negative regulation of transcription from RNA polymerase II promoter; P:type 2 immune response; P:regulation of cell proliferation; P:regulation of cell different…	-
C014R093	---NA---	2.86758	3.10982	0	-	-	-	-	-
C114R097	interferon-induced very large gtpase 1-like	2.86758	2.81051	50	1.1e-71	0.6792	1	F:GTP binding	-
C236R003	uridine-cytidine kinase-like 1 isoform x1	2.86559	2.55177	50	0	0.9598	5	F:uridine kinase activity; F:ATP binding; P:phosphorylation; P:UMP salvage; P:CTP salvage	-
C074R145	---NA---	2.86295	2.71446	0	-	-	-	-	-
C173R128	multiple banded antigen	2.86063	2.73429	50	3.9e-147	0.5752	4	C:plasma membrane; C:integral component of membrane; F:calcium ion binding; P:homophilic cell adhesion via plasma membrane adhesion molecules	-
C184R100	g-protein coupled receptor 4	2.857	2.66229	50	8.3e-93	0.9356	4	C:plasma membrane; C:integral component of membrane; F:G-protein coupled receptor activity; P:G-protein coupled receptor signaling pathway	-
C032R134	probable atp-dependent rna helicase dhx58	2.8504	2.66506	50	0	0.8006	8	C:perinuclear region of cytoplasm; F:DNA binding; F:double-stranded RNA binding; F:helicase activity; F:ATP binding; P:metabolic process; P:innate immune response; P:immune response involved in response to exogenous dsRNA	-
C045R003	---NA---	2.84909	2.4005	0	-	-	-	-	-
C065R145	lysosomal-associated transmembrane protein 4a	2.84843	3.53204	50	2.1e-157	0.8896	3	C:Golgi apparatus; C:integral component of membrane; P:transport	-
C096R114	gtpase hras	2.84777	2.68856	50	3.8e-115	0.9814	48	C:Golgi membrane; C:nucleus; C:cytosol; C:plasma membrane; C:host cell plasma membrane; C:perinuclear region of cytoplasm; F:GTPase activity; F:GTP binding; F:protein C-terminus binding; P:activation of MAPKK activity; P:stimulatory C-type lectin receptor signaling pathway; P:endocytosis; P:cell cycle arrest; P:mitotic cell cycle checkpoint; P:epidermal growth factor receptor signaling pathway; P…	-
C037R107	cysteine--trna partial	2.84711	2.66106	50	1.9e-148	0.8744	4	C:cytosol; F:cysteine-tRNA ligase activity; F:ATP binding; P:cysteinyl-tRNA aminoacylation	-
C050R126	up-regulator of cell proliferation-like	2.84481	3.37565	50	0	0.7638	1	F:GTP binding	-
C257R009	zinc finger protein 710-like	2.84415	2.34947	50	1.1e-58	0.8026	5	C:nucleus; F:nucleic acid binding; F:transcription cofactor activity; F:metal ion binding; P:regulation of transcription from RNA polymerase II promoter	-
C018R016	protein themis2	2.8389	2.74283	50	1.6e-69	0.6698	3	C:cytoplasm; P:T cell receptor signaling pathway; C:nucleus	-
C146R156	protein fam46c	2.83268	2.58172	50	0	0.9034	4	C:membrane; F:mannosyl-oligosaccharide 1,2-alpha-mannosidase activity; F:calcium ion binding; P:metabolic process	-
C127R075	---NA---	2.81799	2.67709	0	-	-	-	-	-
C102R105	cyclic gmp-amp synthase	2.81766	2.56715	50	4.4e-59	0.6896	7	P:cyclic nucleotide biosynthetic process; F:cyclic-GMP-AMP synthase activity; P:activation of innate immune response; C:cytosol; P:positive regulation of defense response to virus by host; P:cellular response to exogenous dsRNA; F:DNA binding	-
C214R053	dnaj homolog subfamily b member 1-like	2.81701	2.64665	50	0	0.838	12	C:nucleus; C:cytosol; C:extracellular exosome; F:ATPase activator activity; F:Hsp70 protein binding; F:unfolded protein binding; F:chaperone binding; F:ATPase binding; P:positive regulation of ATPase activity; P:chaperone mediated protein folding requiring cofactor; P:chaperone cofactor-dependent protein refolding; P:negative regulation of inclusion body assembly	-
C046R114	serine incorporator 5	2.81669	2.97076	50	3.6e-136	0.8324	8	C:endoplasmic reticulum membrane; C:integral component of membrane; F:L-serine transmembrane transporter activity; P:phosphatidylserine metabolic process; P:sphingolipid metabolic process; P:phospholipid biosynthetic process; P:L-serine transport; P:myelination	-
C031R147	---NA---	2.81474	2.8435	0	-	-	-	-	-
C195R168	tumor protein d54-like isoform x1	2.80467	3.59004	50	4.5e-103	0.7906	-	-	-
C240R068	c-c motif chemokine 20-like	2.80338	2.79626	50	1.3e-51	0.6162	7	C:extracellular region; F:chemokine activity; P:immune response; P:dorsal/ventral pattern formation; P:leukocyte chemotaxis; P:regulation of cellular process; P:cellular response to cytokine stimulus	-
C122R146	macrophage myristoylated alanine-rich c kinase-like protein	2.79853	1.8075	3	6.2e-11	1	3	F:calmodulin binding; F:kinase activity; P:phosphorylation	-
C093R078	---NA---	2.79368	2.33972	0	-	-	-	-	-
C029R100	ribonuclease p protein subunit p21	2.78949	3.66505	50	5.7e-111	0.809	5	C:nucleolar ribonuclease P complex; F:ribonuclease P activity; P:tRNA 5'-leader removal; P:response to drug; P:RNA phosphodiester bond hydrolysis, endonucleolytic	-
C205R135	connective tissue growth factor	2.78884	2.6867	50	1.9e-09	0.9736	60	C:proteinaceous extracellular matrix; C:extracellular space; C:Golgi apparatus; C:cis-Golgi network; C:cytosol; C:plasma membrane; C:cell cortex; C:perinuclear region of cytoplasm; F:fibronectin binding; F:integrin binding; F:insulin-like growth factor binding; F:protein C-terminus binding; F:growth factor activity; F:heparin binding; P:cartilage condensation; P:ossification; P:angiogenesis; P:re…	-
C265R031	lysosomal thioesterase ppt2-a-like	2.78884	2.64818	50	0	0.8152	3	C:lysosome; F:palmitoyl-(protein) hydrolase activity; P:macromolecule depalmitoylation	-
C139R036	---NA---	2.78369	3.52877	0	-	-	-	-	-
C023R007	---NA---	2.78241	2.72956	0	-	-	-	-	-
C045R147	e3 ubiquitin-protein ligase rnf114	2.77984	2.78112	50	6.3e-165	0.8054	7	C:intracellular; F:zinc ion binding; F:ubiquitin conjugating enzyme binding; F:ubiquitin protein ligase activity; P:protein polyubiquitination; P:positive regulation of proteasomal ubiquitin-dependent protein catabolic process; P:single-organism process	-
C114R090	interferon-induced protein with tetratricopeptide repeats 5	2.77952	3.96733	50	1.6e-100	0.6214	8	F:RNA binding; F:tRNA binding; C:apical part of cell; C:ruffle membrane; F:poly(A) RNA binding; F:single-stranded RNA binding; C:actin cytoskeleton; P:defense response to virus	-
C140R088	lysosomal thioesterase ppt2-a-like	2.77887	2.60599	50	0	0.8152	3	C:lysosome; F:palmitoyl-(protein) hydrolase activity; P:macromolecule depalmitoylation	-
C082R049	methyl- -binding domain protein 2	2.77566	2.45717	50	1.8e-129	0.8924	16	C:histone deacetylase complex; C:nuclear chromatin; C:heterochromatin; C:cytoplasm; F:RNA polymerase II core promoter proximal region sequence-specific DNA binding; F:RNA polymerase II distal enhancer sequence-specific DNA binding; F:mRNA binding; F:nucleosomal DNA binding; F:siRNA binding; F:C2H2 zinc finger domain binding; P:negative regulation of transcription from RNA polymerase II promoter; …	-
C200R094	---NA---	2.77214	3.43268	0	-	-	-	-	-
C252R126	e3 ubiquitin-protein ligase trim21-like	2.77118	2.83595	50	2.6e-42	0.8078	6	C:cytoplasm; F:protein binding; F:zinc ion binding; F:ligase activity; F:ubiquitin protein ligase activity; P:protein ubiquitination	-
C098R036	casp8 and fadd-like apoptosis regulator	2.76766	3.15433	50	6.8e-64	0.6844	2	F:cysteine-type endopeptidase activity; P:proteolysis	-
C005R099	bifunctional e2 e3 enzyme	2.76734	3.17921	50	9.2e-103	0.7134	4	C:intracellular part; F:ubiquitin-protein transferase activity; F:binding; P:protein ubiquitination	-
C010R097	cd276 antigen homolog isoform x1	2.76542	2.65614	30	1.8e-41	0.6157	1	F:protein binding	-
C181R143	probable polyketide synthase 1	2.76159	2.48745	50	0	0.7478	2	F:transferase activity; P:metabolic process	-
C262R065	cholesterol 25-hydroxylase	2.75936	2.51519	50	0	0.8124	19	C:endoplasmic reticulum membrane; C:integral component of membrane; F:iron ion binding; F:zeinoxanthin epsilon hydroxylase activity; F:DDT 2,3-dioxygenase activity; F:naphthalene disulfonate 1,2-dioxygenase activity; F:benzo(a)pyrene 11,12-epoxidase activity; F:omega-3 fatty acid desaturase activity; F:gamma-glutamyl hercynylcysteine sulfoxide synthase; F:echinenone 3-hydroxylase activity; F:4-ke…	-
C181R099	nuclear pore complex protein nup88	2.75586	2.74664	50	0	0.7798	8	C:nuclear pore; F:transporter activity; F:protein binding; P:ribosomal large subunit export from nucleus; P:ribosomal small subunit export from nucleus; P:mRNA export from nucleus; P:protein import into nucleus; P:protein export from nucleus	-
C095R142	homeobox and leucine zipper protein homez	2.75395	2.3091	50	5.5e-77	0.6344	5	C:nucleus; F:DNA binding; F:transcription factor activity, sequence-specific DNA binding; F:transcription corepressor activity; P:negative regulation of transcription from RNA polymerase II promoter	-
C096R094	interferon-induced very large gtpase 1-like	2.75045	3.10121	50	0	0.6656	1	F:GTP binding	-
C246R136	traf-type zinc finger domain-containing protein 1	2.74822	2.8458	50	0	0.6806	1	F:zinc ion binding	-
C155R152	signal transducer and activator of transcription 3 isoform x1	2.746	2.73208	50	1.5e-124	0.978	18	C:nucleus; C:cytoplasm; F:DNA binding; F:transcription factor activity, sequence-specific DNA binding; F:signal transducer activity; P:establishment of planar polarity; P:epithelial to mesenchymal transition; P:regulation of transcription, DNA-templated; P:JAK-STAT cascade; P:motor neuron axon guidance; P:establishment of cell polarity; P:posterior lateral line neuromast hair cell development; P:…	-
C091R101	cysteine-rich protein 2-like	2.74378	2.20406	50	1.5e-133	0.8722	7	C:cell cortex; C:extracellular matrix; F:protein binding; F:zinc ion binding; P:heart development; P:positive regulation of cell proliferation; P:hemopoiesis	-
C122R127	cmrf35-like molecule 1	2.74062	2.06504	50	5e-44	0.5518	2	C:membrane; F:protein binding	-
C185R016	heat shock protein 70	2.73492	2.57755	50	0	0.9596	9	C:nucleus; C:cytoplasm; C:membrane; F:ATP binding; P:blood vessel development; P:response to xenobiotic stimulus; P:cellular response to heat; P:response to cadmium ion; P:camera-type eye morphogenesis	-
C240R071	prohibitin-2	2.73461	2.56833	50	6.9e-169	0.9564	27	C:mitochondrial outer membrane; C:mitochondrial inner membrane; C:cell surface; C:nuclear matrix; C:protein complex; C:extracellular exosome; C:cell periphery; F:protein C-terminus binding; F:estrogen receptor binding; F:amide binding; F:protein N-terminus binding; P:protein import into nucleus, translocation; P:mitochondrion organization; P:sister chromatid cohesion; P:regulation of complement a…	-
C143R142	hydroxypyruvate isomerase	2.7283	2.51955	50	1.4e-177	0.7912	2	F:hydroxypyruvate isomerase activity; P:metabolic process	-
C055R129	na(+) h(+) exchange regulatory cofactor nhe-rf1	2.72767	3.14778	50	0	0.7226	14	C:plasma membrane; C:endomembrane system; C:cell projection; C:intracellular non-membrane-bounded organelle; C:organelle part; F:receptor binding; F:protein complex scaffold; P:renal system process; P:protein targeting to membrane; P:ion transport; P:receptor clustering; P:regulation of transport; P:sodium ion homeostasis; P:negative regulation of intracellular signal transduction	-
C249R124	septin-7 isoform x2	2.72704	2.58769	50	0	0.9496	22	C:condensed chromosome kinetochore; C:stress fiber; C:nucleolus; C:spindle; C:cytosol; C:axoneme; C:apical plasma membrane; C:midbody; C:septin complex; C:cleavage furrow; C:axon terminus; C:synapse; C:extracellular exosome; F:structural molecule activity; F:GTP binding; F:identical protein binding; P:cytokinesis; P:mitotic nuclear division; P:regulation of embryonic cell shape; P:cilium assembly…	-
C088R163	protein phosphatase 1 regulatory subunit 15a-like	2.72043	2.68019	50	1e-47	0.7302	8	C:cytoplasmic part; P:regulation of gene expression; P:positive regulation of macromolecule metabolic process; P:negative regulation of macromolecule metabolic process; P:negative regulation of cellular metabolic process; P:positive regulation of cellular metabolic process; P:cellular response to stress; P:regulation of protein dephosphorylation	-
C015R036	deoxycytidine kinase	2.71917	2.79691	50	0	0.8868	18	C:nucleus; C:cytosol; F:magnesium ion binding; F:deoxycytidine kinase activity; F:ATP binding; F:drug binding; F:pyrimidine deoxyribonucleoside binding; F:protein homodimerization activity; P:purine nucleobase metabolic process; P:pyrimidine nucleobase metabolic process; P:pyrimidine nucleotide metabolic process; P:deoxyribonucleoside monophosphate biosynthetic process; P:nucleotide biosynthetic …	-
C194R069	sulfotransferase family cytosolic 2b member 1-like	2.71478	2.545	50	2.9e-65	0.7558	11	C:cytosol; C:intracellular membrane-bounded organelle; C:extracellular exosome; F:alcohol sulfotransferase activity; F:protein binding; F:phenanthrol sulfotransferase activity; F:heparan sulfate sulfotransferase activity; F:steroid sulfotransferase activity; P:xenobiotic metabolic process; P:steroid metabolic process; P:3'-phosphoadenosine 5'-phosphosulfate metabolic process	-
C249R140	PREDICTED: uncharacterized protein si:ch211-221j21.3 isoform X1	2.71133	3.02304	2	2e-16	0.625	-	-	-
C065R137	nf-kappa-b inhibitor alpha	2.71102	2.7853	50	0	0.7694	2	F:protein binding; P:response to virus	-
C101R050	cholesterol 25-hydroxylase	2.70445	2.41078	50	0	0.8124	19	C:endoplasmic reticulum membrane; C:integral component of membrane; F:iron ion binding; F:zeinoxanthin epsilon hydroxylase activity; F:DDT 2,3-dioxygenase activity; F:naphthalene disulfonate 1,2-dioxygenase activity; F:benzo(a)pyrene 11,12-epoxidase activity; F:omega-3 fatty acid desaturase activity; F:gamma-glutamyl hercynylcysteine sulfoxide synthase; F:echinenone 3-hydroxylase activity; F:4-ke…	-
C025R063	transcription factor	2.70226	3.14996	50	0	0.721	9	C:nucleus; F:transcription factor activity, sequence-specific DNA binding; F:sequence-specific DNA binding; P:regulation of transcription, DNA-templated; P:embryonic pattern specification; P:anterior/posterior pattern specification; P:rhombomere 5 development; P:rhombomere 6 development; P:rhombomere boundary formation	-
C123R093	connective tissue growth factor	2.69945	3.14233	50	0	0.8976	60	C:proteinaceous extracellular matrix; C:extracellular space; C:Golgi apparatus; C:cis-Golgi network; C:cytosol; C:plasma membrane; C:cell cortex; C:perinuclear region of cytoplasm; F:fibronectin binding; F:integrin binding; F:insulin-like growth factor binding; F:protein C-terminus binding; F:growth factor activity; F:heparin binding; P:cartilage condensation; P:ossification; P:angiogenesis; P:re…	-
C205R093	dnaj homolog subfamily b member 1-like	2.69602	2.49637	50	0	0.838	12	C:nucleus; C:cytosol; C:extracellular exosome; F:ATPase activator activity; F:Hsp70 protein binding; F:unfolded protein binding; F:chaperone binding; F:ATPase binding; P:positive regulation of ATPase activity; P:chaperone mediated protein folding requiring cofactor; P:chaperone cofactor-dependent protein refolding; P:negative regulation of inclusion body assembly	-
C235R056	choline ethanolaminephosphotransferase 1	2.68918	3.07375	50	2.6e-38	0.922	5	C:extracellular region; C:endoplasmic reticulum membrane; F:hormone activity; F:phosphotransferase activity, for other substituted phosphate groups; P:phosphatidylcholine biosynthetic process	-
C093R134	wd repeat and socs box-containing protein 1 isoform x2	2.68639	2.56478	50	4.2e-50	0.8374	4	C:intracellular; F:protein binding; P:protein ubiquitination; P:intracellular signal transduction	-
C112R076	antigen peptide transporter 2-like	2.68204	2.29051	50	0	0.7716	13	C:lysosomal membrane; C:integral component of membrane; F:ATP binding; F:peptide-transporting ATPase activity; P:antigen processing and presentation of exogenous protein antigen via MHC class Ib, TAP-dependent; P:antigen processing and presentation of endogenous peptide antigen via MHC class I via ER pathway, TAP-dependent; P:antigen processing and presentation of endogenous peptide antigen via M…	-
C230R061	interferon- double-stranded rna-activated protein kinase-like	2.67895	2.76958	50	0	0.6846	3	F:protein serine/threonine kinase activity; F:ATP binding; P:protein phosphorylation	-
C001R101	e3 ubiquitin-protein ligase rnf8 isoform x1	2.67153	2.52625	50	0	0.7418	22	C:ubiquitin ligase complex; C:chromosome, telomeric region; C:nucleus; C:site of double-strand break; F:chromatin binding; F:ubiquitin-protein transferase activity; F:zinc ion binding; F:histone binding; F:protein homodimerization activity; F:protein-glycine ligase activity; F:protein-glutamic acid ligase activity; P:double-strand break repair via nonhomologous end joining; P:ubiquitin-dependent …	-
C040R101	interferon-induced protein with tetratricopeptide repeats 5-like	2.66352	2.77406	50	4.8e-85	0.597	4	C:intermediate filament; F:structural molecule activity; F:protein binding; P:defense response to virus	-
C049R082	basement membrane-specific heparan sulfate proteoglycan core partial	2.65614	2.41915	4	2e-46	0.7325	-	-	-
C080R162	ubiquitin-conjugating enzyme e2 d3 isoform x1	2.6491	2.93393	50	5.7e-99	0.9874	50	C:euchromatin; C:sex chromatin; C:cytosol; C:plasma membrane; C:endosome membrane; C:nuclear body; C:PRC1 complex; C:extracellular exosome; C:MLL1 complex; F:chromatin binding; F:ubiquitin-specific protease activity; F:ATP binding; F:zinc ion binding; F:ligase activity; F:NEDD8-specific protease activity; F:ubiquitin protein ligase binding; F:ubiquitin binding; F:ubiquitin protein ligase activity…	-
C071R011	lysosomal-associated transmembrane protein 4a	2.64054	2.53064	50	1.1e-146	0.8534	3	C:Golgi apparatus; C:integral component of membrane; P:transport	-
C170R065	myelin transcription factor 1- partial	2.63506	3.19615	50	2.8e-20	0.9444	4	C:nucleus; F:transcription factor activity, sequence-specific DNA binding; F:zinc ion binding; P:regulation of transcription, DNA-templated	-
C198R105	cd209 antigen-like protein d	2.63293	3.58134	50	7.2e-70	0.6372	1	P:integrin-mediated signaling pathway	-
C192R149	---NA---	2.62048	2.62776	0	-	-	-	-	-
C200R003	e3 ubiquitin-protein ligase rnf8 isoform x1	2.61927	2.37238	50	0	0.7418	22	C:ubiquitin ligase complex; C:chromosome, telomeric region; C:nucleus; C:site of double-strand break; F:chromatin binding; F:ubiquitin-protein transferase activity; F:zinc ion binding; F:histone binding; F:protein homodimerization activity; F:protein-glycine ligase activity; F:protein-glutamic acid ligase activity; P:double-strand break repair via nonhomologous end joining; P:ubiquitin-dependent …	-
C191R102	loc432062 partial	2.61776	1.96587	50	2.2e-118	0.6264	1	P:apoptotic process	-
C217R155	lysosome-associated membrane glycoprotein 3	2.60509	2.98694	50	4.9e-140	0.6002	1	C:membrane	-
C039R098	guanine nucleotide-binding protein g subunit alpha-1	2.60238	2.74505	50	7.8e-113	1	22	C:nucleus; C:lysosomal membrane; C:centrosome; C:heterotrimeric G-protein complex; C:midbody; C:membrane raft; C:extracellular exosome; F:GTPase activity; F:signal transducer activity; F:GTP binding; F:GDP binding; F:G-protein beta/gamma-subunit complex binding; F:G-protein coupled serotonin receptor binding; F:GTPase activating protein binding; F:metal ion binding; P:cell cycle; P:adenylate cycl…	-
C055R115	---NA---	2.60178	2.96288	0	-	-	-	-	-
C083R164	---NA---	2.59998	3.21058	0	-	-	-	-	-
C089R039	mitochondrial glutamate carrier 1-like	2.59848	2.42699	50	1.3e-158	0.8904	4	C:mitochondrial inner membrane; C:integral component of membrane; F:L-glutamate transmembrane transporter activity; P:transmembrane transport	-
C157R158	---NA---	2.59098	2.81019	0	-	-	-	-	-
C003R085	e3 ubiquitin-protein ligase rnf19b	2.59009	2.59308	24	1.5e-22	0.7838	12	C:integral component of membrane; F:ubiquitin-protein transferase activity; F:zinc ion binding; F:UDP-N-acetylmuramoylalanyl-D-glutamyl-2,6-diaminopimelate-D-alanyl-D-alanine ligase activity; F:ribosomal S6-glutamic acid ligase activity; F:coenzyme F420-0 gamma-glutamyl ligase activity; F:coenzyme F420-2 alpha-glutamyl ligase activity; F:protein-glycine ligase activity, initiating; F:protein-glyc…	-
C242R045	ubiquitin carboxyl-terminal hydrolase 25 isoform x4	2.57993	2.33108	50	0	0.8874	7	C:nucleus; F:cysteine-type endopeptidase activity; F:ubiquitin-specific protease activity; P:dorsal/ventral pattern formation; P:protein deubiquitination; P:proteasome-mediated ubiquitin-dependent protein catabolic process; P:regulation of proteasomal protein catabolic process	-
C051R095	ubiquinone biosynthesis protein coq4 mitochondrial	2.57695	2.75331	50	6.5e-49	0.6504	2	C:mitochondrial inner membrane; P:ubiquinone biosynthetic process	-
C048R130	homeobox and leucine zipper protein homez	2.57368	2.61716	50	5.5e-77	0.6344	5	C:nucleus; F:DNA binding; F:transcription factor activity, sequence-specific DNA binding; F:transcription corepressor activity; P:negative regulation of transcription from RNA polymerase II promoter	-
C207R105	bifunctional 3 -phosphoadenosine 5 -phosphosulfate synthase 2-like	2.5719	3.02095	50	0	0.9208	13	C:cytosol; F:adenylylsulfate kinase activity; F:sulfate adenylyltransferase (ATP) activity; F:ATP binding; P:sulfate assimilation; P:carbohydrate metabolic process; P:xenobiotic metabolic process; P:blood coagulation; P:phosphorylation; P:glycosaminoglycan metabolic process; P:3'-phosphoadenosine 5'-phosphosulfate biosynthetic process; P:bone development; P:hydrogen sulfide biosynthetic process	-
C224R121	septin-7 isoform x1	2.5716	2.95672	50	0	0.957	22	C:condensed chromosome kinetochore; C:stress fiber; C:nucleolus; C:spindle; C:cytosol; C:axoneme; C:apical plasma membrane; C:midbody; C:septin complex; C:cleavage furrow; C:axon terminus; C:synapse; C:extracellular exosome; F:structural molecule activity; F:GTP binding; F:identical protein binding; P:cytokinesis; P:mitotic nuclear division; P:regulation of embryonic cell shape; P:cilium assembly…	-
C014R110	cap-specific mrna (nucleoside-2 -o-)-methyltransferase 1	2.56982	2.60359	50	3.7e-55	0.7754	5	C:nucleus; F:nucleic acid binding; F:mRNA (nucleoside-2'-O-)-methyltransferase activity; P:7-methylguanosine mRNA capping; P:cap1 mRNA methylation	-
C027R024	mitofusin-1	2.5633	2.3091	50	1.3e-172	0.8346	8	C:mitochondrial outer membrane; C:integral component of membrane; F:GTPase activity; F:protein binding; F:GTP binding; P:multicellular organismal development; P:mitochondrial fusion; P:metabolic process	-
C126R082	---NA---	2.55738	1.94396	0	-	-	-	-	-
C203R042	glucosamine 6-phosphate n-acetyltransferase	2.55561	2.72767	50	4.4e-118	0.8936	6	C:late endosome; C:endoplasmic reticulum-Golgi intermediate compartment; C:Golgi apparatus; F:glucosamine 6-phosphate N-acetyltransferase activity; F:identical protein binding; P:UDP-N-acetylglucosamine biosynthetic process	-
C219R077	protein lunapark	2.55266	2.52159	50	0	0.7476	7	C:endoplasmic reticulum membrane; C:integral component of membrane; C:endoplasmic reticulum tubular network; F:metal ion binding; P:embryonic limb morphogenesis; P:biological regulation; P:endoplasmic reticulum tubular network organization	-
C034R066	probable e3 ubiquitin-protein ligase herc3	2.54853	2.2522	50	2.2e-141	0.6532	3	F:ubiquitin-protein transferase activity; F:ligase activity; P:protein ubiquitination	-
C104R012	mast cell protease 1a-like	2.54794	2.69883	50	3.1e-161	0.7134	2	F:serine-type endopeptidase activity; P:proteolysis	-
C121R155	---NA---	2.54148	2.00718	0	-	-	-	-	-
C015R121	heat shock protein hsp 90-alpha	2.53737	2.7715	50	0	0.9458	61	C:nucleoplasm; C:mitochondrion; C:cytosol; C:cell surface; C:basolateral plasma membrane; C:apical plasma membrane; C:extracellular matrix; C:brush border membrane; C:ruffle membrane; C:melanosome; C:neuron projection; C:neuronal cell body; C:myelin sheath; C:protein complex; C:perinuclear region of cytoplasm; C:extracellular exosome; C:endocytic vesicle lumen; F:UTP binding; F:CTP binding; F:mRN…	-
C066R012	interferon-induced very large gtpase 1-like	2.53737	2.29448	50	4.6e-117	0.545	2	F:GTP binding; F:nucleotide binding	-
C180R106	myristoylated alanine-rich c-kinase substrate	2.53151	2.7667	50	3.5e-26	0.8818	37	C:outer dense fiber; C:lysosome; C:centrosome; C:cytosol; C:microtubule; C:plasma membrane; C:focal adhesion; C:cell cortex; C:actin cytoskeleton; C:growth cone; C:bleb; C:chromatoid body; C:germinal vesicle; C:dendritic spine; C:axon terminus; C:dendritic branch; C:extracellular exosome; F:phosphatidylserine binding; F:protein kinase C binding; F:calmodulin binding; F:kinase activity; F:actin fi…	-
C097R019	unnamed protein product	2.53034	2.20585	1	6e-08	1	6	C:nucleus; F:histone acetyltransferase activity; F:ligand-dependent nuclear receptor transcription coactivator activity; F:nuclear hormone receptor binding; P:regulation of transcription, DNA-templated; P:histone acetylation	-
C055R072	---NA---	2.52538	2.46599	0	-	-	-	-	-
C220R024	adp-ribosylation factor-like protein 4d	2.52305	1.98343	50	9e-129	0.9114	6	C:nucleus; C:cytoplasm; C:plasma membrane; F:GTP binding; P:intracellular protein transport; P:small GTPase mediated signal transduction	-
C168R156	interferon-induced guanylate-binding protein 1	2.51839	2.10453	50	0	0.7362	7	C:Golgi apparatus; C:membrane; F:GTPase activity; F:GTP binding; P:immune system process; P:metabolic process; P:defense response to other organism	-
C158R050	---NA---	2.51693	2.17523	0	-	-	-	-	-
C172R113	growth arrest and dna damage-inducible protein gadd45 gamma	2.51403	1.93366	50	8.4e-108	0.8814	12	C:nucleus; C:cytoplasm; F:protein binding; P:activation of MAPKKK activity; P:activation of MAPKK activity; P:negative regulation of protein kinase activity; P:multicellular organismal development; P:cell differentiation; P:positive regulation of apoptotic process; P:positive regulation of JNK cascade; P:regulation of cell cycle; P:positive regulation of p38MAPK cascade	-
C171R059	---NA---	2.51287	3.19947	0	-	-	-	-	-
C032R047	heat shock 70 kda protein 13	2.51199	1.95658	50	6e-119	0.8794	3	C:endoplasmic reticulum; C:extracellular exosome; F:ATP binding	-
C179R060	ubiquitin-conjugating enzyme e2 d3 isoform x1	2.51083	2.71666	50	5.7e-99	0.9874	50	C:euchromatin; C:sex chromatin; C:cytosol; C:plasma membrane; C:endosome membrane; C:nuclear body; C:PRC1 complex; C:extracellular exosome; C:MLL1 complex; F:chromatin binding; F:ubiquitin-specific protease activity; F:ATP binding; F:zinc ion binding; F:ligase activity; F:NEDD8-specific protease activity; F:ubiquitin protein ligase binding; F:ubiquitin binding; F:ubiquitin protein ligase activity…	-
C012R098	polypeptide n-acetylgalactosaminyltransferase 12	2.51025	2.65645	26	4.4e-46	0.7396	10	C:Golgi apparatus; C:integral component of membrane; F:mannosyltransferase activity; F:galactosyltransferase activity; F:fucosyltransferase activity; F:phenanthrol glycosyltransferase activity; F:carbohydrate binding; F:UDP-glucosyltransferase activity; F:metal ion binding; P:protein glycosylation	-
C245R119	malignant fibrous histiocytoma-amplified sequence 1 homolog	2.50765	2.1662	50	5.6e-70	0.5784	3	C:intracellular; F:GTP binding; P:small GTPase mediated signal transduction	-
C094R127	interferon-induced protein 44-like	2.50562	1.88709	50	0	0.7712	1	F:GTP binding	-
C207R090	unnamed protein product	2.50504	2.06718	1	1.5e-88	0.8	-	-	-
C038R152	cysteine--trna cytoplasmic isoform x1	2.50157	2.33081	50	0	0.9172	4	C:cytosol; F:cysteine-tRNA ligase activity; F:ATP binding; P:cysteinyl-tRNA aminoacylation	-
C135R067	cysteine--trna cytoplasmic isoform x1	2.49926	2.23716	50	0	0.9172	4	C:cytosol; F:cysteine-tRNA ligase activity; F:ATP binding; P:cysteinyl-tRNA aminoacylation	-
C209R096	tumor necrosis factor alpha-induced protein 2-like	2.49608	2.67586	50	2.4e-92	0.8564	4	C:exocyst; F:SNARE binding; P:exocytosis; P:exocyst localization	-
C138R081	brefeldin a-inhibited guanine nucleotide-exchange protein 1	2.49551	2.61232	50	1.8e-33	0.982	5	C:trans-Golgi network; F:ARF guanyl-nucleotide exchange factor activity; P:vesicle-mediated transport; P:regulation of ARF protein signal transduction; P:positive regulation of GTPase activity	-
C125R162	---NA---	2.49263	2.68019	0	-	-	-	-	-
C060R077	e3 ubiquitin isg15 ligase trim25-like	2.49119	2.0312	50	4.7e-96	0.6094	2	F:protein binding; F:zinc ion binding	-
C262R032	vesicle transport protein sft2a	2.49032	2.55177	50	7.4e-69	0.9064	2	C:integral component of membrane; P:vesicle-mediated transport	-
C045R059	---NA---	2.49032	2.15497	0	-	-	-	-	-
C040R066	---NA---	2.4886	2.58262	0	-	-	-	-	-
C048R031	gastrula zinc finger	2.48745	2.55177	50	4.5e-41	0.7534	2	F:nucleic acid binding; F:metal ion binding	-
C220R092	protein unc-93 homolog b1	2.4863	2.12579	50	2.2e-49	0.7364	1	P:regulation of toll-like receptor signaling pathway	-
C192R067	Transcriptional-regulating factor 1	2.48458	2.28311	50	6.5e-44	0.5118	1	F:metal ion binding	-
C117R028	tcr delta chain	2.484	2.353	5	3.9e-30	0.516	-	-	-
C194R010	mitochondrial ubiquitin ligase activator of nfkb 1-a-like	2.48113	2.21581	50	9.5e-171	0.6754	12	C:membrane; C:intracellular membrane-bounded organelle; C:cytoplasmic part; F:ubiquitin-protein transferase activity; F:binding; F:acid-amino acid ligase activity; P:mitochondrion organization; P:regulation of signal transduction; P:protein ubiquitination; P:positive regulation of cellular process; P:negative regulation of cellular process; P:regulation of cellular component organization	-
C040R038	serine threonine-protein kinase pim-3	2.47999	2.24804	50	0	0.7936	13	C:cytoplasm; F:protein serine/threonine kinase activity; F:protein binding; F:ATP binding; P:G1/S transition of mitotic cell cycle; P:regulation of mitotic cell cycle; P:negative regulation of cell proliferation; P:apoptotic mitochondrial changes; P:response to virus; P:hemopoiesis; P:negative regulation of apoptotic process; P:protein autophosphorylation; P:negative regulation of insulin secreti…	-
C156R155	sodium- and chloride-dependent taurine transporter-like	2.47942	2.64787	50	0	0.922	6	C:integral component of plasma membrane; F:neurotransmitter:sodium symporter activity; F:taurine:sodium symporter activity; P:amino acid transmembrane transport; P:neurotransmitter transport; P:taurine transport	-
C134R038	poly [ADP-ribose] polymerase 11-like	2.47655	2.3454	50	6.4e-17	0.7714	2	F:NAD+ ADP-ribosyltransferase activity; P:metabolic process	-
C209R001	arylamine n- pineal gland isozyme nat-10-like	2.46998	1.91123	50	0	0.7936	2	F:acetyltransferase activity; P:metabolic process	-
C172R051	e3 ubiquitin-protein ligase chip	2.46798	2.75617	50	0	0.8982	30	C:ubiquitin ligase complex; C:nucleoplasm; C:endoplasmic reticulum; C:plasma membrane; C:nuclear inclusion body; C:intermediate filament cytoskeleton; C:extracellular exosome; F:G-protein coupled receptor binding; F:ligase activity; F:kinase binding; F:Hsp70 protein binding; F:TPR domain binding; F:ubiquitin protein ligase binding; F:ubiquitin-ubiquitin ligase activity; F:protein homodimerization…	-
C018R141	c-type lectin domain family 4 member m-like isoform x1	2.46656	2.92513	50	1.3e-65	0.5598	1	F:carbohydrate binding	-
C144R039	all-trans retinoic acid-induced differentiation factor	2.46542	2.82614	50	2.5e-162	0.73	10	C:nuclear envelope; C:membrane; C:perinuclear region of cytoplasm; F:nucleic acid binding; F:zinc ion binding; P:regulation of gene expression; P:positive regulation of bone mineralization; P:negative regulation of osteoblast proliferation; P:positive regulation of osteoblast differentiation; P:negative regulation of cyclin catabolic process	-
C259R020	e3 ubiquitin-protein ligase rnf114	2.462	1.86025	50	1.3e-113	0.8034	6	C:intracellular; F:zinc ion binding; F:ubiquitin conjugating enzyme binding; F:ubiquitin protein ligase activity; P:protein polyubiquitination; P:positive regulation of proteasomal ubiquitin-dependent protein catabolic process	-
C222R126	cytochrome b ascorbate-dependent protein 3 isoform x1	2.45916	2.15447	50	1.3e-111	0.8156	12	C:lysosomal membrane; C:integral component of membrane; C:late endosome membrane; F:N-ethylmaleimide reductase activity; F:reduced coenzyme F420 dehydrogenase activity; F:sulfur oxygenase reductase activity; F:malolactic enzyme activity; F:NADPH:sulfur oxidoreductase activity; F:metal ion binding; F:epoxyqueuosine reductase activity; P:transport; P:oxidation-reduction process	-
C252R081	signal transducer and activator of transcription 3 isoform x1	2.45774	2.85799	50	1.2e-116	0.9742	18	C:nucleus; C:cytoplasm; F:DNA binding; F:transcription factor activity, sequence-specific DNA binding; F:signal transducer activity; P:establishment of planar polarity; P:epithelial to mesenchymal transition; P:regulation of transcription, DNA-templated; P:JAK-STAT cascade; P:motor neuron axon guidance; P:establishment of cell polarity; P:posterior lateral line neuromast hair cell development; P:…	-
C214R113	af4 fmr2 family member 3	2.45746	2.462	50	0	0.751	5	C:nucleoplasm; C:cytoplasm; F:double-stranded DNA binding; P:response to tumor necrosis factor; P:embryonic hindlimb morphogenesis	-
C195R041	g2 mitotic-specific cyclin-b1	2.4549	2.95604	50	1.6e-108	0.8954	42	C:spindle pole; C:condensed nuclear chromosome outer kinetochore; C:nucleoplasm; C:centrosome; C:cytosol; C:membrane; F:patched binding; F:protein kinase binding; F:histone kinase activity; P:G1/S transition of mitotic cell cycle; P:G2/M transition of mitotic cell cycle; P:mitotic prophase; P:mitotic prometaphase; P:oocyte maturation; P:in utero embryonic development; P:negative regulation of pro…	-
C218R112	---NA---	2.45122	2.82223	0	-	-	-	-	-
C176R085	e3 ubiquitin-protein ligase chip	2.45009	2.67153	50	0	0.9146	30	C:ubiquitin ligase complex; C:nucleoplasm; C:endoplasmic reticulum; C:plasma membrane; C:nuclear inclusion body; C:intermediate filament cytoskeleton; C:extracellular exosome; F:G-protein coupled receptor binding; F:ligase activity; F:kinase binding; F:Hsp70 protein binding; F:TPR domain binding; F:ubiquitin protein ligase binding; F:ubiquitin-ubiquitin ligase activity; F:protein homodimerization…	-
C142R063	antigen peptide transporter 2-like	2.44867	2.462	50	0	0.8778	14	C:lysosomal membrane; C:TAP complex; F:ATP binding; F:peptide-transporting ATPase activity; F:MHC protein binding; P:antigen processing and presentation of exogenous protein antigen via MHC class Ib, TAP-dependent; P:antigen processing and presentation of endogenous peptide antigen via MHC class I via ER pathway, TAP-dependent; P:antigen processing and presentation of endogenous peptide antigen v…	-
C045R164	dep domain-containing mtor-interacting protein isoform x2	2.44443	2.71133	50	4e-52	0.9578	6	C:intracellular; F:protein binding; P:negative regulation of protein kinase activity; P:negative regulation of TOR signaling; P:negative regulation of cell size; P:regulation of extrinsic apoptotic signaling pathway	-
C221R164	d-tyrosyl-trna deacylase 1	2.44048	2.56685	50	2.5e-135	0.8876	14	C:nucleus; C:cytoplasm; F:aminoacyl-tRNA editing activity; F:DNA binding; F:aminoacyl-tRNA ligase activity; F:phosphoric ester hydrolase activity; F:T/G mismatch-specific endonuclease activity; F:retroviral 3' processing activity; F:metal ion binding; F:D-tyrosyl-tRNA(Tyr) deacylase activity; P:DNA replication; P:tRNA metabolic process; P:regulation of translational fidelity; P:D-amino acid catab…	-
C177R146	---NA---	2.43373	2.52713	0	-	-	-	-	-
C152R121	mitochondrial glutamate carrier 1-like	2.43007	2.60569	50	1.3e-158	0.8904	4	C:mitochondrial inner membrane; C:integral component of membrane; F:L-glutamate transmembrane transporter activity; P:transmembrane transport	-
C105R135	transposable element tcb1 partial	2.42951	2.31712	50	4.3e-34	0.633	4	F:DNA binding; F:transposase activity; P:transposition, DNA-mediated; P:DNA integration	-
C200R001	c-x-c chemokine receptor type 3-like	2.42503	2.7422	50	2.1e-118	0.8056	8	C:integral component of membrane; F:C-X-C chemokine receptor activity; P:regulation of leukocyte migration; P:chemotaxis; P:inflammatory response; P:G-protein coupled receptor signaling pathway; P:neutrophil activation; P:chemokine-mediated signaling pathway	-
C056R035	dual specificity protein phosphatase 5	2.42055	3.40424	50	6.6e-129	0.7742	5	F:protein tyrosine phosphatase activity; F:MAP kinase tyrosine/serine/threonine phosphatase activity; P:inactivation of MAPK activity; P:endoderm formation; P:peptidyl-tyrosine dephosphorylation	-
C231R100	non-canonical poly rna polymerase papd5	2.41971	2.87322	50	1.1e-115	0.724	2	F:nucleotidyltransferase activity; P:metabolic process	-
C171R050	hexaprenyldihydroxybenzoate mitochondrial	2.41719	2.46798	50	1.1e-58	0.8754	6	C:mitochondrion; F:O-methyltransferase activity; F:2-polyprenyl-6-methoxy-1,4-benzoquinone methyltransferase activity; P:glycerol metabolic process; P:ubiquinone biosynthetic process; P:methylation	-
C151R011	---NA---	2.41664	1.6573	0	-	-	-	-	-
C035R117	f-box only protein 6-like	2.41329	2.53151	50	0	0.7606	1	F:protein binding	-
C265R062	heat shock protein hsp 90-alpha	2.41273	3.05181	50	0	0.9458	61	C:nucleoplasm; C:mitochondrion; C:cytosol; C:cell surface; C:basolateral plasma membrane; C:apical plasma membrane; C:extracellular matrix; C:brush border membrane; C:ruffle membrane; C:melanosome; C:neuron projection; C:neuronal cell body; C:myelin sheath; C:protein complex; C:perinuclear region of cytoplasm; C:extracellular exosome; C:endocytic vesicle lumen; F:UTP binding; F:CTP binding; F:mRN…	-
C096R089	lipid phosphate phosphohydrolase 1 isoform x2	2.41078	2.84087	50	2.1e-93	0.8334	6	C:plasma membrane; C:integral component of membrane; C:extracellular exosome; F:phosphatidate phosphatase activity; P:protein dephosphorylation; P:lipid metabolic process	-
C043R118	n-arachidonyl glycine receptor	2.40827	2.28311	50	2.8e-150	0.8584	8	C:integral component of membrane; F:G-protein coupled receptor activity; P:G-protein coupled receptor signaling pathway; P:positive regulation of cell proliferation; P:positive regulation of gene expression; P:negative regulation of gene expression; P:positive regulation of nitric oxide biosynthetic process; P:positive regulation of lysozyme activity	-
C160R067	tudor domain-containing protein 7b-like	2.40466	2.64268	50	1.2e-59	0.7754	10	C:mitochondrial matrix; C:chromatoid body; C:P granule; F:mRNA binding; F:protein N-terminus binding; P:lens morphogenesis in camera-type eye; P:spermatogenesis; P:posttranscriptional regulation of gene expression; P:P granule organization; P:lens fiber cell differentiation	-
C099R103	---NA---	2.40327	2.59068	0	-	-	-	-	-
C105R074	rna-directed dna polymerase from mobile element jockey-like	2.40105	2.31926	50	2.7e-59	0.7758	12	F:nucleotide binding; F:DNA binding; F:RNA-directed DNA polymerase activity; F:protein kinase activity; F:methyltransferase activity; F:oxidoreductase activity, acting on paired donors, with incorporation or reduction of molecular oxygen, 2-oxoglutarate as one donor, and incorporation of one atom each of oxygen into both donors; F:cofactor binding; P:RNA-dependent DNA replication; P:transposition…	-
C104R157	transcription factor isoform x2	2.39496	2.5007	50	0	0.7176	12	C:nucleus; C:cytoplasm; F:transcription factor activity, sequence-specific DNA binding; F:transcription regulatory region DNA binding; P:leukocyte differentiation; P:regulation of transcription from RNA polymerase II promoter; P:defense response; P:positive regulation of gene expression; P:intracellular signal transduction; P:T-helper 1 type immune response; P:leukocyte activation; P:negative reg…	-
C241R139	y+l amino acid transporter 1	2.39247	2.91333	50	0	0.9208	8	C:integral component of plasma membrane; C:basolateral plasma membrane; F:basic amino acid transmembrane transporter activity; F:L-amino acid transmembrane transporter activity; F:antiporter activity; P:regulation of arginine metabolic process; P:basic amino acid transport; P:L-alpha-amino acid transmembrane transport	-
C008R110	interferon-induced very large gtpase 1-like	2.39192	2.42251	50	1.6e-130	0.7544	1	F:GTP binding	-
C164R095	secernin- partial	2.39164	2.14379	50	6.2e-39	0.6028	3	P:proteolysis; F:dipeptidase activity; P:exocytosis	-
C036R037	---NA---	2.39053	2.24441	0	-	-	-	-	-
C234R107	interferon-induced protein with tetratricopeptide repeats 5-like	2.38998	2.25324	50	1.8e-70	0.7476	1	P:defense response to virus	-
C222R066	fish virus induced trim protein	2.3886	2.02558	50	2.5e-70	0.759	2	C:intracellular; F:zinc ion binding	-
C149R003	chloride channel clic-like protein 1 isoform x1	2.38833	2.26394	50	2.4e-114	0.6628	4	F:DNA binding; F:transposase activity; P:transposition, DNA-mediated; P:DNA integration	-
C031R090	cysteine--trna cytoplasmic isoform x1	2.38529	2.80176	50	0	0.9172	4	C:cytosol; F:cysteine-tRNA ligase activity; F:ATP binding; P:cysteinyl-tRNA aminoacylation	-
C216R065	phospholipid scramblase family member 5-like	2.38199	1.7401	6	7.4e-08	0.5433	-	-	-
C021R149	periphilin-1-like	2.37924	2.46998	50	4.8e-167	0.7298	-	-	-
C221R024	inorganic pyrophosphatase-like	2.37265	2.39883	50	0	0.9086	4	C:cytoplasm; F:magnesium ion binding; F:inorganic diphosphatase activity; P:phosphate-containing compound metabolic process	-
C170R011	cdgsh iron-sulfur domain-containing protein mitochondrial	2.37019	2.18328	50	8.3e-33	0.761	3	C:intracellular membrane-bounded organelle; F:metal ion binding; F:2 iron, 2 sulfur cluster binding	-
C103R105	---NA---	2.36936	2.57814	0	-	-	-	-	-
C248R073	e3 ubiquitin-protein ligase trim21-like	2.36526	2.41245	50	0	0.6206	2	F:protein binding; F:zinc ion binding	-
C093R143	modulator of retrovirus infection homolog	2.36499	2.3249	12	2e-117	0.5583	-	-	-
C024R039	---NA---	2.35626	2.14355	0	-	-	-	-	-
C144R111	active breakpoint cluster region-related	2.35517	2.55384	50	8.2e-88	0.7712	9	C:intracellular; C:membrane; F:Rho guanyl-nucleotide exchange factor activity; F:GTPase activator activity; P:regulation of localization; P:regulation of Rho protein signal transduction; P:positive regulation of GTPase activity; P:single-multicellular organism process; P:negative regulation of biological process	-
C097R065	---NA---	2.35409	2.54118	0	-	-	-	-	-
C207R152	dna-binding protein ikaros isoform x1	2.35409	2.31685	50	0	0.8934	6	C:nucleus; F:DNA binding; F:metal ion binding; P:B cell differentiation; P:T cell differentiation in thymus; P:negative regulation of transcription, DNA-templated	-
C017R094	ubiquitin-conjugating enzyme e2 w	2.35191	2.37265	50	9.4e-63	0.9352	19	C:nucleus; C:membrane coat; C:terminal bouton; C:extracellular exosome; F:ATP binding; F:protein transporter activity; F:ligase activity; F:ubiquitin protein ligase binding; F:ubiquitin protein ligase activity; F:ubiquitin conjugating enzyme activity; P:DNA repair; P:protein monoubiquitination; P:misfolded or incompletely synthesized protein catabolic process; P:intracellular protein transport; P…	-
C263R022	sulfotransferase family cytosolic 2b member 1-like	2.3492	2.17297	50	0	0.779	18	F:N-acetylglucosamine 6-O-sulfotransferase activity; F:N-acetylgalactosamine 4-O-sulfotransferase activity; F:heparan sulfate 2-O-sulfotransferase activity; F:HNK-1 sulfotransferase activity; F:heparan sulfate 6-O-sulfotransferase activity; F:trans-9R,10R-dihydrodiolphenanthrene sulfotransferase activity; F:1-phenanthrol sulfotransferase activity; F:3-phenanthrol sulfotransferase activity; F:4-ph…	-
C105R015	---NA---	2.34432	2.31685	0	-	-	-	-	-
C184R101	eukaryotic translation initiation factor 4 gamma 3-like	2.34323	2.13959	50	1.8e-31	0.9226	1	F:RNA binding	-
C100R113	growth arrest and dna damage-inducible protein gadd45 beta	2.34296	2.44613	50	3.1e-106	0.8732	14	C:nucleus; C:cytoplasm; F:protein binding; P:activation of MAPKKK activity; P:activation of MAPKK activity; P:somitogenesis; P:negative regulation of protein kinase activity; P:cell differentiation; P:positive regulation of apoptotic process; P:positive regulation of JNK cascade; P:response to cadmium ion; P:response to methylmercury; P:regulation of cell cycle; P:positive regulation of p38MAPK c…	-
C163R079	bifunctional methylenetetrahydrofolate dehydrogenase mitochondrial	2.34269	2.00324	50	0	0.926	13	C:extracellular space; C:mitochondrion; C:cytosol; F:magnesium ion binding; F:formate-tetrahydrofolate ligase activity; F:methenyltetrahydrofolate cyclohydrolase activity; F:methylenetetrahydrofolate dehydrogenase (NAD+) activity; F:methylenetetrahydrofolate dehydrogenase (NADP+) activity; F:phosphate ion binding; P:one-carbon metabolic process; P:folic acid-containing compound biosynthetic proce…	-
C047R144	e3 ubiquitin-protein ligase trim39-like	2.34134	2.6072	50	8.7e-56	0.69	2	F:protein binding; F:metal ion binding	-
C017R019	receptor-type tyrosine-protein phosphatase epsilon-like isoform x1	2.33836	2.79078	50	3.4e-20	0.9954	2	F:protein tyrosine phosphatase activity; P:peptidyl-tyrosine dephosphorylation	-
C091R170	septin-7 isoform x2	2.33378	2.3579	50	0	0.9516	22	C:condensed chromosome kinetochore; C:stress fiber; C:nucleolus; C:spindle; C:cytosol; C:axoneme; C:apical plasma membrane; C:midbody; C:septin complex; C:cleavage furrow; C:axon terminus; C:synapse; C:extracellular exosome; F:structural molecule activity; F:GTP binding; F:identical protein binding; P:cytokinesis; P:mitotic nuclear division; P:regulation of embryonic cell shape; P:cilium assembly…	-
C213R031	---NA---	2.33324	2.1344	0	-	-	-	-	-
C101R095	vascular cell adhesion protein 1-like	2.3327	2.06217	50	3.8e-105	0.5574	1	F:protein binding	-
C233R120	autophagy-related protein 9a	2.33001	2.58083	50	1.9e-43	0.7106	7	C:endosome; P:response to stress; P:organelle organization; P:cellular protein localization; P:single-organism catabolic process; P:single-organism cellular process; P:nucleophagy	-
C203R106	hydroxypyruvate isomerase	2.32974	2.02698	50	1.4e-177	0.7912	2	F:hydroxypyruvate isomerase activity; P:metabolic process	-
C235R166	periphilin-1-like	2.32785	2.24	50	8e-136	0.814	5	C:nucleoplasm; C:Golgi apparatus; F:protein binding; F:poly(A) RNA binding; P:keratinization	-
C035R044	cytochrome b ascorbate-dependent protein 3 isoform x1	2.32597	2.31873	50	1.3e-111	0.8156	12	C:lysosomal membrane; C:integral component of membrane; C:late endosome membrane; F:N-ethylmaleimide reductase activity; F:reduced coenzyme F420 dehydrogenase activity; F:sulfur oxygenase reductase activity; F:malolactic enzyme activity; F:NADPH:sulfur oxidoreductase activity; F:metal ion binding; F:epoxyqueuosine reductase activity; P:transport; P:oxidation-reduction process	-
C256R147	ubiquitin carboxyl-terminal hydrolase 47-like	2.32382	2.64512	50	0	0.6612	4	F:cysteine-type peptidase activity; F:ubiquitinyl hydrolase activity; P:ubiquitin-dependent protein catabolic process; P:protein deubiquitination	-
C075R165	sjchgc04011 protein	2.32355	2.74791	9	2.9e-17	0.7411	6	C:nucleus; F:transcription factor activity, sequence-specific DNA binding; F:calcium ion binding; F:zinc ion binding; F:sequence-specific DNA binding; P:regulation of transcription, DNA-templated	-
C237R066	regulator of g-protein signaling 13-like	2.32221	2.34621	50	4.1e-91	0.8394	5	C:cytoplasm; C:plasma membrane; F:GTPase activator activity; P:termination of G-protein coupled receptor signaling pathway; P:positive regulation of GTPase activity	-
C094R034	hydroxypyruvate isomerase	2.32221	2.02792	50	1.4e-177	0.7912	2	F:hydroxypyruvate isomerase activity; P:metabolic process	-
C237R079	non-canonical poly rna polymerase papd5	2.31846	2.64634	50	8.2e-138	0.687	2	F:nucleotidyltransferase activity; P:metabolic process	-
C057R096	unnamed protein product	2.31846	2.05314	50	5.3e-80	0.5994	-	-	-
C170R022	---NA---	2.31819	2.32114	0	-	-	-	-	-
C023R095	nuclear pore complex protein nup88	2.31659	2.17196	50	5.6e-161	0.8088	8	C:nuclear pore; C:nucleoplasm; F:transporter activity; P:ribosomal large subunit export from nucleus; P:ribosomal small subunit export from nucleus; P:mRNA export from nucleus; P:protein import into nucleus; P:protein export from nucleus	-
C160R126	cst complex subunit stn1 isoform x1	2.31525	2.45292	50	0	0.7524	3	C:nuclear chromosome, telomeric region; F:single-stranded telomeric DNA binding; P:telomere maintenance via telomere lengthening	-
C088R063	protein quaking-a isoform x1	2.31418	2.33405	40	2.7e-07	0.9528	1	F:RNA binding	-
C211R049	interferon-induced very large gtpase 1-like	2.31071	2.27022	50	4.7e-136	0.7414	1	F:GTP binding	-
C146R029	leukocyte immune-type receptor partial	2.31044	2.49407	50	3.6e-78	0.5668	1	F:protein binding	-
C168R143	rna-binding protein 7	2.30937	2.35082	50	1.5e-98	0.6282	2	F:nucleotide binding; F:nucleic acid binding	-
C112R131	transposable element tc1 transposase	2.30777	2.22813	7	3.4e-17	0.8286	8	C:nucleus; F:nucleotide binding; F:nucleic acid binding; F:zinc ion binding; F:oxidoreductase activity; P:DNA metabolic process; P:gene silencing by RNA; P:oxidation-reduction process	-
C158R120	e3 ubiquitin isg15 ligase trim25-like	2.30351	2.58381	50	0	0.653	1	F:zinc ion binding	-
C149R073	zinc-binding alcohol dehydrogenase domain-containing protein 2	2.30244	1.91853	50	0	0.8842	5	C:mitochondrion; C:peroxisome; F:zinc ion binding; F:oxidoreductase activity; P:oxidation-reduction process	-
C224R021	coiled-coil domain-containing protein 71	2.30218	2.29236	50	6.4e-155	0.7126	-	-	-
C043R088	interferon-induced guanylate-binding protein 1-like	2.29687	-	50	0	0.7354	5	C:cytoplasm; C:membrane; F:GTPase activity; F:GTP binding; P:metabolic process	-
C043R041	transmembrane protein 106b-like	2.29209	2.06384	50	6.1e-125	0.758	1	C:integral component of membrane	-
C246R076	ubiquitin-conjugating enzyme e2 d3 isoform x1	2.29157	2.6069	50	5.7e-99	0.9874	50	C:euchromatin; C:sex chromatin; C:cytosol; C:plasma membrane; C:endosome membrane; C:nuclear body; C:PRC1 complex; C:extracellular exosome; C:MLL1 complex; F:chromatin binding; F:ubiquitin-specific protease activity; F:ATP binding; F:zinc ion binding; F:ligase activity; F:NEDD8-specific protease activity; F:ubiquitin protein ligase binding; F:ubiquitin binding; F:ubiquitin protein ligase activity…	-
C198R086	tumor necrosis factor alpha-induced protein 2-like	2.28971	2.13366	50	4e-89	0.8538	4	C:exocyst; F:SNARE binding; P:exocytosis; P:exocyst localization	-
C245R158	fish virus induced trim protein	2.28892	2.39745	50	8.9e-114	0.8568	3	C:intracellular; F:zinc ion binding; F:chaperone binding	-
C262R052	interferon-induced guanylate-binding protein 1	2.28707	2.13687	50	0	0.7362	7	C:Golgi apparatus; C:membrane; F:GTPase activity; F:GTP binding; P:immune system process; P:metabolic process; P:defense response to other organism	-
C006R117	non-canonical poly rna polymerase papd5	2.28628	2.52013	50	6e-92	0.643	3	F:binding; F:nucleotidyltransferase activity; P:RNA metabolic process	-
C126R104	---NA---	2.28601	2.09314	0	-	-	-	-	-
C102R015	alpha-taxilin	2.28548	1.85832	50	1.8e-143	0.856	11	C:extracellular region; C:cytoplasm; C:membrane; F:cytokine activity; F:syntaxin binding; F:high molecular weight B cell growth factor receptor binding; P:exocytosis; P:cell proliferation; P:B cell activation; P:mitophagy in response to mitochondrial depolarization; P:regulation of mitophagy	-
C053R145	vascular cell adhesion protein 1-like	2.28205	2.14751	50	3.8e-105	0.5574	1	F:protein binding	-
C227R035	arf-gap with dual ph domain-containing protein 2-like	2.28047	2.25012	50	4.7e-153	0.8354	6	F:GTPase activator activity; F:metal ion binding; P:heart looping; P:heart jogging; P:atrioventricular valve development; P:positive regulation of GTPase activity	-
C033R040	---NA---	2.27468	2.75045	0	-	-	-	-	-
C009R120	zinc-binding protein a33-like	2.27468	2.23612	50	1.5e-135	0.7288	3	C:cytoplasm; F:zinc ion binding; F:ubiquitin protein ligase activity	-
C094R081	upf0415 protein c7orf25 homolog	2.27363	1.88906	50	0	0.7966	1	F:protein binding	-
C242R141	cytochrome b-c1 complex subunit 8	2.27075	2.49666	50	3.8e-54	0.8472	3	C:mitochondrial inner membrane; F:ubiquinol-cytochrome-c reductase activity; P:hydrogen ion transmembrane transport	-
C252R023	sodium-dependent phosphate transporter 1-a-like	2.27048	2.06122	50	0	0.823	5	C:integral component of plasma membrane; F:inorganic phosphate transmembrane transporter activity; F:sodium:inorganic phosphate symporter activity; P:phosphate ion transmembrane transport; P:regulation of cellular process	-
C119R009	---NA---	2.27048	1.85082	0	-	-	-	-	-
C242R155	---NA---	2.26996	2.21044	0	-	-	-	-	-
C181R058	tnf receptor-associated factor 1	2.26944	2.18707	50	2.9e-151	0.8286	8	F:ubiquitin-protein transferase activity; F:tumor necrosis factor receptor binding; F:zinc ion binding; F:ubiquitin protein ligase binding; F:thioesterase binding; P:protein ubiquitination; P:positive regulation of NF-kappaB transcription factor activity; P:regulation of extrinsic apoptotic signaling pathway	-
C081R146	poly [ADP-ribose] polymerase 14	2.26891	2.06575	50	0	0.6882	3	F:nucleotide binding; F:RNA binding; F:NAD+ ADP-ribosyltransferase activity	-
C093R136	cklf-like marvel transmembrane domain-containing protein 7	2.26524	2.00116	50	2.2e-96	0.7888	4	C:integral component of membrane; F:protein kinase activity; F:ATP binding; P:protein phosphorylation	-
C014R142	nuclear factor ovary-like	2.26472	2.2966	50	1.2e-108	0.64	3	F:metal ion binding; F:zinc ion binding; C:intracellular	-
C061R153	an1-type zinc finger protein 3	2.26263	2.36499	50	5.1e-131	0.7818	2	F:DNA binding; F:zinc ion binding	-
C162R124	c-x-c chemokine receptor type 2-like	2.26158	3.06772	19	1.6e-18	0.5616	4	C:membrane; F:chemokine receptor activity; P:signal transduction; P:response to chemical	-
C070R075	e3 ubiquitin-protein ligase dtx3l-like	2.25897	2.0567	50	7.1e-121	0.799	1	F:zinc ion binding	-
C036R008	---NA---	2.25662	2.65369	0	-	-	-	-	-
C090R059	g-protein coupled receptor 4-like	2.25584	2.34269	22	7.8e-49	0.6823	3	C:integral component of membrane; F:G-protein coupled receptor activity; P:G-protein coupled receptor signaling pathway	-
C106R081	---NA---	2.25168	2.74347	0	-	-	-	-	-
C221R071	probable e3 ubiquitin-protein ligase herc3 isoform x1	2.25116	2.1632	50	0	0.7242	2	F:ubiquitin-protein transferase activity; P:protein ubiquitination	-
C172R088	eukaryotic translation initiation factor 4e	2.24986	2.42727	50	1.3e-124	0.7004	26	C:cytoplasmic mRNA processing body; C:nucleus; C:cytosol; C:mRNA cap binding complex; C:cytoplasmic stress granule; C:eukaryotic translation initiation factor 4F complex; C:RISC complex; C:perinuclear region of cytoplasm; C:extracellular exosome; F:RNA 7-methylguanosine cap binding; F:translation initiation factor activity; F:enzyme binding; F:eukaryotic initiation factor 4G binding; F:poly(A) RN…	-
C041R142	zgc:162339 protein	2.24934	2.29474	50	4.8e-99	0.6994	3	F:molecular_function; P:biological_process; C:cellular_component	-
C187R114	poly [ADP-ribose] polymerase 9	2.24674	2.17875	50	1.7e-147	0.632	6	F:NAD+ ADP-ribosyltransferase activity; P:metabolic process; P:regulation of response to interferon-gamma; C:cytoplasm; P:double-strand break repair; C:membrane	-
C250R070	nuclear pore complex protein nup88	2.24389	2.19745	50	0	0.8498	8	C:nuclear pore; C:nucleoplasm; F:transporter activity; P:ribosomal large subunit export from nucleus; P:ribosomal small subunit export from nucleus; P:mRNA export from nucleus; P:protein import into nucleus; P:protein export from nucleus	-
C140R113	bifunctional methylenetetrahydrofolate dehydrogenase mitochondrial	2.24311	2.24052	50	0	0.926	13	C:extracellular space; C:mitochondrion; C:cytosol; F:magnesium ion binding; F:formate-tetrahydrofolate ligase activity; F:methenyltetrahydrofolate cyclohydrolase activity; F:methylenetetrahydrofolate dehydrogenase (NAD+) activity; F:methylenetetrahydrofolate dehydrogenase (NADP+) activity; F:phosphate ion binding; P:one-carbon metabolic process; P:folic acid-containing compound biosynthetic proce…	-
C224R037	eukaryotic translation initiation factor 4 gamma partial	2.24311	2.1934	50	0	0.7396	3	F:RNA binding; F:protein binding; F:zinc ion binding	-
C173R110	ecto-adp-ribosyltransferase 4-like	2.2413	2.81311	50	2e-93	0.6042	2	F:NAD(P)+-protein-arginine ADP-ribosyltransferase activity; P:protein ADP-ribosylation	-
C022R055	glucosamine 6-phosphate n-acetyltransferase	2.23871	2.34134	50	4.4e-118	0.8936	6	C:late endosome; C:endoplasmic reticulum-Golgi intermediate compartment; C:Golgi apparatus; F:glucosamine 6-phosphate N-acetyltransferase activity; F:identical protein binding; P:UDP-N-acetylglucosamine biosynthetic process	-
C017R030	---NA---	2.23277	2.55118	0	-	-	-	-	-
C127R129	---NA---	2.23071	1.61945	0	-	-	-	-	-
C054R043	---NA---	2.22556	2.17046	0	-	-	-	-	-
C136R111	e3 ubiquitin-protein ligase trim21-like	2.22504	1.95975	50	5.1e-95	0.7382	3	C:intracellular; F:catalytic activity; F:zinc ion binding	-
C110R061	---NA---	2.22247	2.14132	0	-	-	-	-	-
C024R127	circularly permutated ras protein 1-like	2.22093	2.59068	50	0	0.684	4	F:zinc ion binding; C:COPII vesicle coat; P:ER to Golgi vesicle-mediated transport; P:intracellular protein transport	-
C021R116	forkhead box protein p4 isoform x1	2.21965	2.05765	50	2.5e-82	0.915	6	C:nucleus; F:RNA polymerase II transcription factor activity, sequence-specific DNA binding; F:sequence-specific DNA binding; P:regulation of transcription from RNA polymerase II promoter; P:anatomical structure morphogenesis; P:cell differentiation	-
C077R145	gtpase imap family member 4-like	2.21709	3.6816	50	7.8e-144	0.783	1	F:GTP binding	-
C233R122	udp-n-acetylglucosamine udp-glucose gdp-mannose transporter	2.21555	2.09024	50	0	0.8142	5	C:integral component of membrane; F:pyrimidine nucleotide-sugar transmembrane transporter activity; F:antiporter activity; P:pyrimidine nucleotide-sugar transmembrane transport; P:anion transmembrane transport	-
C239R055	coiled-coil domain-containing protein 134	2.21427	1.89978	50	1.3e-124	0.914	1	C:membrane	-
C066R082	signal transducer and activator of transcription 5b-like	2.21351	2.11501	50	7.9e-41	0.8476	51	C:nucleus; C:cytoplasm; F:RNA polymerase II core promoter sequence-specific DNA binding; F:transcription factor activity, sequence-specific DNA binding; F:signal transducer activity; F:protein phosphatase binding; P:allantoin metabolic process; P:luteinization; P:citrate metabolic process; P:2-oxoglutarate metabolic process; P:succinate metabolic process; P:oxaloacetate metabolic process; P:isole…	-
C095R106	nuclear factor nf-kappa-b p105 subunit	2.21018	2.50562	50	1.4e-145	0.7904	51	C:nucleoplasm; C:mitochondrion; C:cytosol; C:I-kappaB/NF-kappaB complex; F:RNA polymerase II distal enhancer sequence-specific DNA binding; F:transcriptional activator activity, RNA polymerase II distal enhancer sequence-specific binding; F:transcriptional repressor activity, RNA polymerase II transcription regulatory region sequence-specific binding; F:chromatin binding; F:transcription factor b…	-
C018R156	PREDICTED: uncharacterized protein LOC105021618	2.20967	2.07892	36	1.4e-58	0.5019	1	F:protein binding	-
C216R118	interferon-induced guanylate-binding protein 1	2.20636	1.89583	50	0	0.7362	7	C:Golgi apparatus; C:membrane; F:GTPase activity; F:GTP binding; P:immune system process; P:metabolic process; P:defense response to other organism	-
C238R157	rna-directed dna polymerase from mobile element jockey-like	2.20508	1.83062	50	1.2e-69	0.7026	5	F:DNA binding; F:oxidoreductase activity; F:transferase activity; F:cofactor binding; P:metabolic process	-
C017R160	e3 ubiquitin-protein ligase trim39-like	2.20356	2.4312	50	1.9e-55	0.7612	6	C:intracellular; F:ubiquitin-protein transferase activity; F:protein binding; F:zinc ion binding; F:ligase activity; P:protein ubiquitination	-
C124R141	cytoplasmic protein nck1 isoform x1	2.20025	1.56844	50	4.8e-132	0.872	39	C:protein phosphatase type 1 complex; C:nucleus; C:endoplasmic reticulum; C:cytosol; C:ribosome; C:plasma membrane; C:cell-cell junction; C:vesicle membrane; F:protein kinase inhibitor activity; F:SH3/SH2 adaptor activity; F:cytoskeletal adaptor activity; F:protein domain specific binding; F:receptor signaling complex scaffold activity; F:receptor tyrosine kinase binding; F:eukaryotic initiation …	-
C202R140	poly [ADP-ribose] polymerase 9	2.19923	2.39385	50	3.9e-65	0.5646	3	C:cytoplasm; F:transferase activity; P:DNA repair	-
C030R065	myelin-associated glyco	2.19872	2.08541	50	8.4e-134	0.663	2	C:integral component of membrane; F:protein binding	-
C166R128	methionine aminopeptidase 1	2.19771	2.43457	50	4.3e-153	0.8182	11	C:nucleus; C:cytosolic ribosome; F:metal ion binding; F:metalloaminopeptidase activity; P:regulation of translation; P:proteolysis; P:peptidyl-methionine modification; P:regulation of rhodopsin mediated signaling pathway; P:N-terminal protein amino acid modification; P:protein initiator methionine removal; P:platelet aggregation	-
C266R063	protein smg9	2.19771	2.36608	50	2e-141	0.9084	4	C:cytosol; F:identical protein binding; P:nuclear-transcribed mRNA catabolic process, nonsense-mediated decay; P:gene expression	-
C016R087	e3 ubiquitin isg15 ligase trim25-like	2.1972	2.15348	50	0	0.6268	3	C:intracellular; F:protein binding; F:zinc ion binding	-
C122R031	transmembrane protein 179b	2.19593	1.82935	50	9.9e-122	0.7106	1	C:integral component of membrane	-
C053R070	---NA---	2.19542	1.91189	0	-	-	-	-	-
C091R052	protein-glutamine gamma-glutamyltransferase 2	2.19466	2.25168	50	0	0.6674	5	C:cell part; F:protein-glutamine gamma-glutamyltransferase activity; P:peptide cross-linking; P:single-organism process; P:biological regulation	-
C106R131	uridine-cytidine kinase 2	2.19264	2.26917	50	2.4e-126	0.9264	14	C:cytosol; C:intracellular membrane-bounded organelle; F:uridine kinase activity; F:protein binding; F:ATP binding; P:pyrimidine nucleobase metabolic process; P:CMP salvage; P:feeding behavior; P:phosphorylation; P:protein deubiquitination; P:UMP salvage; P:CTP salvage; P:response to axon injury; P:cellular response to oxygen levels	-
C218R036	non-canonical poly rna polymerase papd5	2.19213	2.06694	50	3.8e-147	0.9162	13	C:nucleolus; C:cytoplasm; F:DNA binding; F:DNA-directed DNA polymerase activity; F:polynucleotide adenylyltransferase activity; F:poly(A) RNA binding; F:metal ion binding; P:rRNA processing; P:mRNA processing; P:mitotic nuclear division; P:cell division; P:histone mRNA catabolic process; P:DNA biosynthetic process	-
C099R122	---NA---	2.18935	2.1312	0	-	-	-	-	-
C113R119	---NA---	2.18808	1.92563	0	-	-	-	-	-
C171R110	reticulon-2 isoform x1	2.1853	1.92252	1	5e-06	0.55	-	-	-
C266R119	o-acetyl-adp-ribose deacetylase 1	2.18328	2.14578	50	6.2e-122	0.8366	3	F:purine nucleoside binding; F:deacetylase activity; P:purine nucleoside metabolic process	-
C262R036	serine threonine-protein kinase sgk3	2.18152	2.14157	50	5e-21	0.9096	16	C:cytoplasmic membrane-bounded vesicle; F:protein serine/threonine kinase activity; F:calcium channel regulator activity; F:ATP binding; F:potassium channel regulator activity; F:sodium channel regulator activity; F:chloride channel regulator activity; F:phosphatidylinositol binding; P:regulation of cell growth; P:cellular sodium ion homeostasis; P:positive regulation of sodium ion transport; P:p…	-
C155R078	40s ribosomal protein sa	2.17976	2.0167	50	8.8e-42	0.9704	13	C:nucleus; C:plasma membrane; C:cytosolic small ribosomal subunit; C:90S preribosome; F:structural constituent of ribosome; F:laminin receptor activity; F:laminin binding; P:ribosomal small subunit assembly; P:endonucleolytic cleavage in ITS1 to separate SSU-rRNA from 5.8S rRNA and LSU-rRNA from tricistronic rRNA transcript (SSU-rRNA, 5.8S rRNA, LSU-rRNA); P:endonucleolytic cleavage to generate m…	-
C055R137	tyrosine-protein kinase zap-70	2.17976	1.80792	50	0	0.8468	19	C:immunological synapse; C:cytosol; C:cell-cell junction; C:T cell receptor complex; C:membrane raft; F:phosphotyrosine binding; F:non-membrane spanning protein tyrosine kinase activity; F:ATP binding; P:lymphangiogenesis; P:peptidyl-tyrosine phosphorylation; P:beta selection; P:positive thymic T cell selection; P:negative thymic T cell selection; P:positive regulation of alpha-beta T cell differ…	-
C094R109	serine-rich adhesin for platelets-like	2.17925	1.85168	27	1.2e-24	0.6207	2	F:ion binding; P:metabolic process	-
C227R039	---NA---	2.17825	2.09652	0	-	-	-	-	-
C096R095	phd finger protein 6	2.17699	2.06575	50	4.6e-97	0.6874	3	F:DNA binding; F:protein binding; F:zinc ion binding	-
C010R029	tapasin-related	2.17674	2.49349	50	1.9e-134	0.695	1	F:protein binding	-
C037R083	inositol monophosphatase 1	2.17674	2.18707	50	0	0.8876	13	C:cytoplasm; C:extracellular exosome; F:magnesium ion binding; F:inositol monophosphate 1-phosphatase activity; F:manganese ion binding; F:lithium ion binding; F:protein homodimerization activity; P:inositol metabolic process; P:protein dephosphorylation; P:phosphatidylinositol biosynthetic process; P:signal transduction; P:phosphatidylinositol phosphorylation; P:inositol phosphate dephosphorylat…	-
C220R051	ubiquitin-conjugating enzyme e2 d3 isoform x1	2.17573	2.37347	50	1.6e-104	0.9876	50	C:euchromatin; C:sex chromatin; C:cytosol; C:plasma membrane; C:endosome membrane; C:nuclear body; C:PRC1 complex; C:extracellular exosome; C:MLL1 complex; F:chromatin binding; F:ubiquitin-specific protease activity; F:ATP binding; F:zinc ion binding; F:ligase activity; F:NEDD8-specific protease activity; F:ubiquitin protein ligase binding; F:ubiquitin binding; F:ubiquitin protein ligase activity…	-
C119R147	tumor protein d54-like isoform x2	2.17196	2.09943	50	5e-113	0.8144	-	-	-
C014R008	scm-like with four mbt domains protein 1	2.17196	2.0095	50	1.3e-50	0.9352	3	C:nucleus; F:protein binding; P:regulation of transcription, DNA-templated	-
C033R008	interferon-induced very large gtpase 1-like	2.17196	1.84059	50	4.2e-137	0.7882	1	F:GTP binding	-
C051R059	interleukin-4 receptor alpha chain precursor	2.17021	2.15323	50	0	0.5416	5	C:integral component of membrane; F:cytokine receptor activity; F:protein binding; P:production of molecular mediator involved in inflammatory response; P:cytokine-mediated signaling pathway	-
C078R112	tropomyosin alpha-1 chain isoform x3	2.16996	1.86714	50	5.3e-149	0.965	30	C:stress fiber; C:podosome; C:cytosol; C:muscle thin filament tropomyosin; C:growth cone; C:cortical cytoskeleton; C:filamentous actin; C:bleb; C:cleavage furrow; C:ruffle membrane; F:structural constituent of cytoskeleton; F:structural constituent of muscle; F:protein homodimerization activity; F:protein N-terminus binding; F:actin filament binding; P:in utero embryonic development; P:positive r…	-
C254R152	tip elongation aberrant protein 3-like isoform x1	2.16946	1.9203	50	0	0.627	4	C:extracellular region; F:hormone activity; F:growth factor activity; P:growth	-
C265R119	atp-dependent 6- platelet type-like isoform x3	2.16495	2.76894	50	0	0.961	7	C:cytoplasm; F:6-phosphofructokinase activity; F:ATP binding; F:metal ion binding; P:fructose 6-phosphate metabolic process; P:glycolytic process; P:carbohydrate phosphorylation	-
C103R033	interleukin-4 receptor alpha chain precursor	2.1637	2.17071	50	0	0.5416	5	C:integral component of membrane; F:cytokine receptor activity; F:protein binding; P:production of molecular mediator involved in inflammatory response; P:cytokine-mediated signaling pathway	-
C248R123	baculoviral iap repeat-containing protein 2	2.1627	2.27889	50	0	0.8408	11	C:nucleus; C:cytoplasm; C:spindle microtubule; F:ubiquitin-protein transferase activity; F:protein binding; F:zinc ion binding; F:cysteine-type endopeptidase inhibitor activity involved in apoptotic process; P:regulation of signal transduction; P:protein ubiquitination; P:mitotic spindle assembly; P:inhibition of cysteine-type endopeptidase activity involved in apoptotic process	-
C051R005	transposable element tcb2 transposase	2.1627	1.95703	20	5.8e-17	0.784	14	C:cation channel complex; C:intracellular organelle; C:plasma membrane protein complex; F:DNA binding; F:transposase activity; F:calcium channel activity; F:voltage-gated cation channel activity; P:transposition, DNA-mediated; P:potassium ion transport; P:calcium ion transport; P:DNA integration; P:single organismal cell-cell adhesion; P:regulation of cellular process; P:inorganic cation transmem…	-
C117R142	poly [ADP-ribose] polymerase 12-like	2.16095	1.86413	50	0	0.6452	1	F:zinc ion binding	-
C170R013	leucine-rich repeat-containing g-protein coupled receptor 4	2.15572	1.99262	50	7.2e-56	0.8182	16	C:integral component of plasma membrane; F:protein binding; F:protein-hormone receptor activity; P:osteoblast differentiation; P:regulation of transcription, DNA-templated; P:G-protein coupled receptor signaling pathway; P:spermatogenesis; P:bone mineralization; P:circadian regulation of gene expression; P:negative regulation of toll-like receptor signaling pathway; P:bone remodeling; P:epithelia…	-
C206R145	interferon-induced protein with tetratricopeptide repeats 5-like	2.15497	2.33836	50	5.2e-154	0.6944	2	F:protein binding; P:defense response to virus	-
C123R153	c-myc-binding protein	2.15372	1.80688	50	1.7e-26	0.7994	3	F:transcription coactivator activity; P:regulation of transcription, DNA-templated; P:positive regulation of smoothened signaling pathway	-
C052R125	H2.0-like homeobox protein	2.14851	1.77995	50	0	0.7316	5	C:nucleus; F:sequence-specific DNA binding; P:sprouting angiogenesis; P:regulation of transcription, DNA-templated; P:cell differentiation in spinal cord	-
C150R161	mitogen-activated protein kinase kinase kinase mlt-like	2.14826	2.41999	2	1.5e-12	0.945	3	F:protein kinase activity; F:ATP binding; P:protein phosphorylation	-
C245R013	unnamed protein product, partial	2.14751	2.22042	2	1.3e-12	0.785	3	C:nucleus; F:nucleic acid binding; P:DNA integration	-
C094R021	polymorphic mucin variant c7 2	2.14553	1.90066	50	9.6e-53	0.6026	8	P:proteolysis; F:carboxypeptidase activity; P:DNA repair; F:DNA-directed DNA polymerase activity; F:DNA polymerase activity; P:DNA biosynthetic process; C:nucleus; F:DNA binding	-
C155R031	---NA---	2.14454	2.07796	0	-	-	-	-	-
C156R110	optineurin	2.14355	2.29979	50	0	0.7084	9	C:nucleus; C:Golgi apparatus; C:cytoplasmic membrane-bounded vesicle; F:K63-linked polyubiquitin binding; P:protein targeting to Golgi; P:axonogenesis; P:regulation of I-kappaB kinase/NF-kappaB signaling; P:vesicle localization; P:Golgi ribbon formation	-
C101R018	zinc-binding protein a33-like	2.14206	1.96678	50	6.8e-57	0.6772	3	C:cytoplasm; F:protein binding; F:ubiquitin protein ligase activity	-
C188R019	unnamed protein product	2.14107	1.68005	1	1.4e-07	1	-	-	-
C237R131	dual specificity protein phosphatase 1	2.13984	2.31498	50	0	0.8704	26	C:nucleus; C:cytoplasm; F:non-membrane spanning protein tyrosine phosphatase activity; F:protein binding; F:protein tyrosine/threonine phosphatase activity; F:MAP kinase tyrosine/serine/threonine phosphatase activity; P:inactivation of MAPK activity; P:endoderm formation; P:response to light stimulus; P:response to estradiol; P:response to retinoic acid; P:cellular response to hormone stimulus; P…	-
C181R079	hydroxypyruvate isomerase	2.1386	1.98069	50	1.4e-177	0.7912	2	F:hydroxypyruvate isomerase activity; P:metabolic process	-
C041R089	mitochondrial glutamate carrier 1-like	2.13835	2.54824	50	7.7e-178	0.9	4	C:mitochondrial inner membrane; C:integral component of membrane; F:L-glutamate transmembrane transporter activity; P:transmembrane transport	-
C039R082	perforin-1-like	2.13588	2.42055	50	0	0.7844	3	C:membrane attack complex; F:protein binding; P:immune response	-
C168R018	unnamed protein product	2.13391	1.74533	2	1e-07	0.935	-	-	-
C026R079	o-acetyl-adp-ribose deacetylase macrod1 isoform x1	2.13243	2.39496	50	0	0.6996	1	P:cellular process	-
C089R050	regulator of microtubule dynamics protein 3	2.13194	2.17221	50	8.9e-160	0.8218	3	C:spindle; C:mitochondrial membrane; F:protein binding	-
C188R147	helicase with zinc finger domain 2	2.13169	1.66786	50	0	0.7606	4	F:nucleic acid binding; F:ATP binding; F:ligand-dependent nuclear receptor transcription coactivator activity; F:metal ion binding	-
C010R067	unnamed protein product	2.13071	1.95794	1	3.6e-14	0.68	-	-	-
C057R036	zinc finger with ufm1-specific peptidase domain protein	2.13046	2.30298	50	0	0.7578	3	F:thiolester hydrolase activity; F:ubiquitin-like protein-specific protease activity; F:metal ion binding	-
C135R169	receptor-interacting serine threonine-protein kinase 3-like	2.12776	2.10259	50	6e-89	0.72	3	F:protein serine/threonine kinase activity; F:ATP binding; P:protein phosphorylation	-
C145R109	tenascin-n isoform x2	2.12628	1.81945	50	4.8e-154	0.8798	2	F:protein binding; P:single-organism cellular process	-
C020R155	heat shock protein hsp 90-alpha	2.1253	2.86725	50	1.9e-78	0.9576	70	C:nucleoplasm; C:mitochondrion; C:cytosol; C:COP9 signalosome; C:cell surface; C:inclusion body; C:basolateral plasma membrane; C:apical plasma membrane; C:extracellular matrix; C:brush border membrane; C:ruffle membrane; C:melanosome; C:neuron projection; C:neuronal cell body; C:myelin sheath; C:perinuclear region of cytoplasm; C:extracellular exosome; C:endocytic vesicle lumen; F:UTP binding; F…	-
C235R048	---NA---	2.12383	2.45973	0	-	-	-	-	-
C165R015	methionine aminopeptidase 1	2.1226	2.03425	50	0	0.9256	11	C:nucleus; C:cytosolic ribosome; F:metal ion binding; F:metalloaminopeptidase activity; P:regulation of translation; P:proteolysis; P:peptidyl-methionine modification; P:regulation of rhodopsin mediated signaling pathway; P:N-terminal protein amino acid modification; P:protein initiator methionine removal; P:platelet aggregation	-
C137R036	g-protein coupled receptor 4	2.12187	2.09072	50	7.7e-86	0.7664	3	C:integral component of plasma membrane; F:G-protein coupled receptor activity; P:G-protein coupled receptor signaling pathway	-
C135R148	interferon- double-stranded rna-activated protein kinase-like	2.12113	2.19669	50	0	0.5708	8	F:RNA binding; F:double-stranded RNA adenosine deaminase activity; F:protein serine/threonine kinase activity; F:ATP binding; P:protein phosphorylation; P:positive regulation of biological process; P:regulation of cellular process; P:regulation of multicellular organismal process	-
C024R044	serine threonine-protein kinase endoribonuclease ire1	2.1177	1.90154	50	3.3e-86	0.6968	25	C:integral component of endoplasmic reticulum membrane; C:IRE1-TRAF2-ASK1 complex; C:IRE1-RACK1-PP2A complex; F:magnesium ion binding; F:endoribonuclease activity; F:protein serine/threonine kinase activity; F:ATP binding; F:enzyme binding; F:Hsp70 protein binding; F:protein homodimerization activity; F:ADP binding; F:Hsp90 protein binding; P:endothelial cell proliferation; P:mRNA catabolic proce…	-
C197R138	mixed lineage kinase domain-like protein	2.11697	2.15771	50	2.3e-118	0.7268	3	F:protein kinase activity; F:ATP binding; P:protein phosphorylation	-
C059R079	e3 ubiquitin-protein ligase trim21-like	2.1155	2.23148	50	1.9e-93	0.735	4	C:intracellular; F:catalytic activity; F:protein binding; F:zinc ion binding	-
C016R085	stonustoxin subunit alpha	2.11257	2.19923	50	5.2e-178	0.6454	1	F:GTP binding	-
C146R086	chromodomain-helicase-dna-binding protein 4-like isoform x2	2.11135	1.69466	6	6.8e-13	0.95	9	C:NuRD complex; F:DNA binding; F:ATP binding; F:microtubule binding; F:ATP-dependent helicase activity; F:zinc ion binding; P:chromatin organization; P:regulation of transcription, DNA-templated; P:spindle assembly	-
C197R102	e3 ubiquitin-protein ligase rnf128 isoform x1	2.10989	1.6489	50	0	0.7114	13	C:late endosome; C:endoplasmic reticulum; C:Golgi apparatus; F:protein binding; F:zinc ion binding; F:ubiquitin protein ligase activity; F:protein-glycine ligase activity; F:protein-glutamic acid ligase activity; P:regulation of protein stability; P:negative regulation of cytokine biosynthetic process; P:protein ubiquitination involved in ubiquitin-dependent protein catabolic process; P:protein l…	-
C207R073	interferon-induced protein with tetratricopeptide repeats 5-like	2.1094	2.37293	50	8.3e-124	0.6482	1	P:defense response to virus	-
C212R084	---NA---	2.1077	2.07244	0	-	-	-	-	-
C178R074	cap-specific mrna (nucleoside-2 -o-)-methyltransferase 1	2.10721	2.29899	50	1.2e-105	0.9332	7	C:nucleoplasm; C:cytoplasm; F:nucleic acid binding; F:mRNA (nucleoside-2'-O-)-methyltransferase activity; F:protein binding; P:7-methylguanosine mRNA capping; P:cap1 mRNA methylation	-
C175R100	---NA---	2.10648	2.67153	0	-	-	-	-	-
C257R084	---NA---	2.10648	2.44811	0	-	-	-	-	-
C201R074	eukaryotic translation initiation factor 4 gamma 3 isoform x9	2.10648	1.73347	50	9.7e-171	0.9354	4	F:RNA binding; F:metalloendopeptidase activity; F:protein binding; P:proteolysis	-
C174R161	---NA---	2.1038	2.27626	0	-	-	-	-	-
C129R119	---NA---	2.1038	1.8908	0	-	-	-	-	-
C044R065	---NA---	2.10332	1.85489	0	-	-	-	-	-
C061R104	cysteine--trna cytoplasmic isoform x1	2.1021	2.02277	50	0	0.9172	4	C:cytosol; F:cysteine-tRNA ligase activity; F:ATP binding; P:cysteinyl-tRNA aminoacylation	-
C012R050	small glutamine-rich tetratricopeptide repeat-containing protein alpha	2.10162	2.40883	50	0	0.81	1	F:protein binding	-
C015R051	transcription factor jun-d-like	2.10162	2.52275	50	0	0.8208	20	C:nuclear chromatin; C:nucleoplasm; C:transcription factor complex; F:RNA polymerase II core promoter proximal region sequence-specific DNA binding; F:RNA polymerase II transcription factor activity, sequence-specific DNA binding; F:transcription coactivator activity; F:transcription factor binding; P:negative regulation of transcription from RNA polymerase II promoter; P:response to radiation; P…	-
C084R169	a2 protein	2.10016	1.86822	7	5.4e-14	0.5	2	P:neuropeptide signaling pathway; C:extracellular region	-
C240R040	interferon-induced very large gtpase 1-like	2.09749	2.08734	50	2.2e-116	0.6466	1	F:GTP binding	-
C112R167	arpin	2.09556	1.81336	50	4.3e-145	0.8224	8	C:lamellipodium; F:metallopeptidase activity; F:zinc ion binding; P:proteolysis; P:negative regulation of cell migration; P:directional locomotion; P:negative regulation of actin nucleation; P:negative regulation of lamellipodium morphogenesis	-
C051R112	---NA---	2.09483	2.47627	0	-	-	-	-	-
C152R007	probable e3 ubiquitin-protein ligase herc4	2.09362	2.13662	50	0	0.9288	6	C:cytosol; F:ubiquitin-protein transferase activity; F:ligase activity; P:spermatogenesis; P:cell differentiation; P:protein ubiquitination involved in ubiquitin-dependent protein catabolic process	-
C053R033	transposable element tcb1 transposase	2.09338	2.2781	50	2.5e-32	0.704	18	C:integral component of membrane; C:SWI/SNF complex; C:Smc5-Smc6 complex; F:DNA binding; F:transmembrane receptor protein tyrosine kinase activity; F:transposase activity; F:ATP binding; F:mechanically-gated ion channel activity; F:oxidoreductase activity; F:ATPase activity; P:double-strand break repair via homologous recombination; P:transposition, DNA-mediated; P:regulation of transcription, DN…	-
C074R150	s-antigen partial	2.09048	2.0586	11	5e-14	0.5355	9	C:symbiont-containing vacuole; F:calcium ion binding; F:lipid binding; P:lipid transport; P:lipoprotein metabolic process; C:extracellular region; P:transport; F:semaphorin receptor activity; P:semaphorin-plexin signaling pathway	-
C039R169	---NA---	2.08565	2.01345	0	-	-	-	-	-
C066R062	carboxy-terminal domain rna polymerase ii polypeptide a small phosphatase 1	2.08469	1.68724	50	1.2e-11	0.8712	7	C:extracellular exosome; F:CTD phosphatase activity; P:negative regulation of protein phosphorylation; P:regulation of transcription from RNA polymerase II promoter; P:protein dephosphorylation; P:negative regulation of neuron differentiation; P:negative regulation of G1/S transition of mitotic cell cycle	-
C015R159	leucine-rich repeat serine threonine-protein kinase 2	2.08325	2.13219	50	2.1e-174	0.7204	82	C:extracellular space; C:mitochondrial inner membrane; C:mitochondrial matrix; C:lysosome; C:endosome; C:endoplasmic reticulum; C:trans-Golgi network; C:cytosol; C:plasma membrane; C:synaptic vesicle; C:inclusion body; C:ribonucleoprotein complex; C:cytoplasmic side of mitochondrial outer membrane; C:dendrite cytoplasm; C:terminal bouton; C:perikaryon; C:membrane raft; C:extracellular exosome; F:…	-
C216R071	dermatan-sulfate epimerase isoform x1	2.08228	2.06051	50	6.1e-28	0.8296	3	C:endomembrane system; C:intracellular membrane-bounded organelle; C:cytoplasmic part	-
C217R057	tripartite motif-containing protein 35-like	2.08108	1.99469	50	3.2e-113	0.6676	3	C:intracellular; F:protein binding; F:zinc ion binding	-
C054R097	terminal uridylyltransferase 4	2.07724	2.00277	50	8.3e-25	0.8034	5	F:nucleic acid binding; F:zinc ion binding; F:nucleotidyltransferase activity; P:metabolic process; P:regulation of cellular process	-
C108R165	spastin	2.07724	2.4603	50	9.1e-100	0.944	31	C:nucleus; C:endosome; C:endoplasmic reticulum; C:centrosome; C:spindle; C:microtubule; C:integral component of membrane; C:midbody; C:cytoplasmic vesicle; C:perinuclear region of cytoplasm; C:extracellular exosome; F:ATP binding; F:microtubule binding; F:microtubule-severing ATPase activity; F:alpha-tubulin binding; F:beta-tubulin binding; P:microtubule bundle formation; P:ER to Golgi vesicle-me…	-
C105R048	e3 ubiquitin-protein ligase trim21-like	2.07484	2.40077	50	6.5e-94	0.7192	3	C:intracellular; F:protein binding; F:zinc ion binding	-
C156R092	metalloproteinase inhibitor 2	2.0734	2.78209	50	7.1e-146	0.8538	20	C:basement membrane; C:extracellular space; C:cell surface; C:extracellular exosome; F:protease binding; F:integrin binding; F:enzyme activator activity; F:metalloendopeptidase inhibitor activity; F:FBXO family protein binding; P:negative regulation of cell proliferation; P:response to hormone; P:negative regulation of endopeptidase activity; P:regulation of cAMP metabolic process; P:response to …	-
C246R156	metalloproteinase inhibitor 2	2.07316	2.47455	50	7.1e-146	0.8538	20	C:basement membrane; C:extracellular space; C:cell surface; C:extracellular exosome; F:protease binding; F:integrin binding; F:enzyme activator activity; F:metalloendopeptidase inhibitor activity; F:FBXO family protein binding; P:negative regulation of cell proliferation; P:response to hormone; P:negative regulation of endopeptidase activity; P:regulation of cAMP metabolic process; P:response to …	-
C149R140	---NA---	2.07197	2.03449	0	-	-	-	-	-
C202R008	adp-ribosylarginine hydrolase	2.07101	1.94711	50	0	0.724	3	F:magnesium ion binding; F:ADP-ribosylarginine hydrolase activity; P:protein de-ADP-ribosylation	-
C032R086	aminopeptidase n-like	2.06814	1.78303	50	2.7e-174	0.8192	6	C:cytoplasm; F:zinc ion binding; F:peptide binding; F:metalloaminopeptidase activity; P:proteolysis; P:peptide catabolic process	-
C100R095	leucine-rich repeat-containing protein 28	2.06742	2.02698	50	3.2e-107	0.8484	1	F:protein binding	-
C116R044	phosphoenolpyruvate carboxykinase	2.06527	2.33863	50	0	0.923	8	C:mitochondrion; C:extracellular exosome; F:phosphoenolpyruvate carboxykinase (ATP) activity; F:phosphoenolpyruvate carboxykinase (GTP) activity; F:GTP binding; F:kinase activity; P:gluconeogenesis; P:phosphorylation	-
C232R067	protein ssuh2 homolog	2.06504	2.11746	50	6.5e-93	0.712	2	F:heat shock protein binding; F:unfolded protein binding	-
C127R123	cd83 antigen	2.06432	2.24908	50	4e-146	0.7198	4	C:cell surface; F:protein binding; P:T cell activation involved in immune response; P:dendritic cell antigen processing and presentation	-
C078R138	---NA---	2.0636	2.10745	0	-	-	-	-	-
C140R119	inactive serine threonine-protein kinase vrk3	2.06289	2.25142	50	0	0.6944	7	C:cytoplasm; F:protein serine/threonine kinase activity; F:ATP binding; P:endocytosis; P:regulation of cell shape; P:Wnt signaling pathway; P:peptidyl-serine phosphorylation	-
C049R145	adenosine deaminase	2.06217	1.90858	50	0	0.8556	36	C:lysosome; C:external side of plasma membrane; C:cell junction; C:cytoplasmic membrane-bounded vesicle lumen; F:adenosine deaminase activity; F:zinc ion binding; P:response to hypoxia; P:liver development; P:germinal center B cell differentiation; P:positive regulation of germinal center formation; P:negative regulation of leukocyte migration; P:negative regulation of mature B cell apoptotic pro…	-
C091R138	cklf-like marvel transmembrane domain-containing protein 7	2.06027	2.06217	50	1.6e-93	0.7954	4	C:integral component of membrane; F:protein kinase activity; F:ATP binding; P:protein phosphorylation	-
C196R065	formin-like protein 13	2.06027	1.46256	50	6.8e-71	0.7642	-	-	-
C153R167	---NA---	2.05908	1.7219	0	-	-	-	-	-
C035R051	serine threonine-protein kinase nek1 isoform x2	2.05813	1.86499	50	1.4e-67	0.7072	1	F:protein serine/threonine kinase activity	-
C106R088	lysophospholipid acyltransferase lpcat4	2.05742	1.87688	50	0	0.7432	3	F:calcium ion binding; F:transferase activity, transferring acyl groups other than amino-acyl groups; P:metabolic process	-
C028R009	adp-ribosylarginine hydrolase	2.05718	1.7401	50	0	0.7272	3	F:magnesium ion binding; F:ADP-ribosylarginine hydrolase activity; P:protein de-ADP-ribosylation	-
C113R114	alpha-galactosidase a	2.05718	1.71594	50	0	0.8368	24	C:endoplasmic reticulum membrane; C:Golgi apparatus; C:integral component of membrane; C:endoplasmic reticulum-Golgi intermediate compartment membrane; C:lysosomal lumen; C:extracellular exosome; F:lysine N-acetyltransferase activity, acting on acetyl phosphate as donor; F:receptor binding; F:galactoside binding; F:protein homodimerization activity; F:cysteine-S-conjugate N-acetyltransferase acti…	-
C136R170	sterile alpha motif domain-containing protein 9- partial	2.05647	2.0188	50	3.3e-158	0.7852	-	-	-
C227R038	dispanin subfamily a member 2b-like	2.05528	2.06814	50	2.8e-54	0.7114	2	C:integral component of membrane; P:response to biotic stimulus	-
C072R019	tyrosine-protein kinase jak1	2.05504	1.5728	50	3.4e-134	0.7498	20	C:nucleus; C:cytoplasm; C:cytoskeleton; C:focal adhesion; C:extrinsic component of cytoplasmic side of plasma membrane; F:non-membrane spanning protein tyrosine kinase activity; F:growth hormone receptor binding; F:ATP binding; F:protein phosphatase binding; F:ubiquitin protein ligase binding; F:CCR5 chemokine receptor binding; P:transmembrane receptor protein tyrosine kinase signaling pathway; P…	-
C226R079	ubiquitin-like protein 3	2.05433	2.05077	50	6e-72	0.9208	3	C:intracellular; C:plasma membrane; C:extracellular exosome	-
C131R163	suppressor of g2 allele of skp1 homolog	2.05125	1.89321	50	6.8e-143	0.801	10	C:ubiquitin ligase complex; C:kinetochore; C:nucleus; C:cytosol; F:protein binding; P:mitotic nuclear division; P:regulation of protein stability; P:nucleotide-binding domain, leucine rich repeat containing receptor signaling pathway; P:positive regulation by host of symbiont catalytic activity; P:innate immune response	-
C266R069	patched domain-containing protein 3-like	2.05101	1.97954	50	0	0.7948	3	C:integral component of membrane; F:hedgehog receptor activity; P:signal transduction	-
C080R059	---NA---	2.0503	2.11991	0	-	-	-	-	-
C233R109	sterile alpha motif domain-containing protein 9-like	2.04982	1.44076	50	0	0.733	-	-	-
C065R054	transcription factor e3 isoform x1	2.04959	2.22581	50	1e-42	0.7042	9	C:nucleoplasm; C:transcription factor complex; C:cytoplasm; F:RNA polymerase II core promoter proximal region sequence-specific DNA binding; F:transcriptional activator activity, RNA polymerase II core promoter proximal region sequence-specific binding; F:protein heterodimerization activity; P:humoral immune response; P:regulation of osteoclast differentiation; P:positive regulation of transcript…	-
C264R064	poly [ADP-ribose] polymerase 12	2.04722	2.73082	50	0	0.7262	3	F:NAD+ ADP-ribosyltransferase activity; F:metal ion binding; P:metabolic process	-
C205R081	---NA---	2.04722	2.48659	0	-	-	-	-	-
C244R087	serum amyloid a	2.04391	2.14875	50	4.3e-37	0.8068	8	C:high-density lipoprotein particle; C:extracellular exosome; F:chemoattractant activity; P:acute-phase response; P:response to bacterium; P:response to organic substance; P:positive chemotaxis; P:cell chemotaxis	-
C041R022	mx3 protein	2.04155	1.4811	50	0	0.8986	7	C:nucleus; C:cytosol; C:perinuclear region of cytoplasm; F:GTPase activity; F:GTP binding; P:metabolic process; P:response to type I interferon	-
C129R146	catenin beta-1	2.03967	1.44143	50	0	0.981	183	C:spindle pole; C:nucleoplasm; C:nuclear euchromatin; C:centrosome; C:cytosol; C:zonula adherens; C:fascia adherens; C:bicellular tight junction; C:focal adhesion; C:cell cortex; C:basolateral plasma membrane; C:lateral plasma membrane; C:catenin complex; C:flotillin complex; C:Z disc; C:lamellipodium; C:desmosome; C:beta-catenin destruction complex; C:microvillus membrane; C:protein-DNA complex;…	-
C089R092	tripartite motif-containing protein 35-like	2.0392	2.33486	50	0	0.7762	4	C:intracellular; F:protein binding; F:zinc ion binding; F:transferase activity	-
C229R091	---NA---	2.0359	1.84378	0	-	-	-	-	-
C174R152	cd83 antigen	2.03566	2.47798	50	3.5e-149	0.7132	4	C:cell surface; F:protein binding; P:T cell activation involved in immune response; P:dendritic cell antigen processing and presentation	-
C208R145	glutamate-rich wd repeat-containing protein 1	2.03566	1.91035	50	8.3e-115	0.8806	4	C:nucleolus; C:cytoplasm; F:protein binding; F:poly(A) RNA binding	-
C168R102	tyrosine-protein kinase jak1	2.03355	2.1896	50	1.3e-139	0.8616	30	C:nucleus; C:cytosol; C:cytoskeleton; C:focal adhesion; C:endomembrane system; C:extrinsic component of cytoplasmic side of plasma membrane; F:non-membrane spanning protein tyrosine kinase activity; F:growth hormone receptor binding; F:ATP binding; F:protein phosphatase binding; F:ubiquitin protein ligase binding; F:CCR5 chemokine receptor binding; P:activation of MAPKK activity; P:morphogenesis …	-
C220R082	retrovirus-related pol polyprotein line-1	2.03308	2.26028	2	5.1e-10	0.485	-	-	-
C117R148	interferon-induced protein 44-like	2.02979	1.96564	50	0	0.7926	1	F:GTP binding	-
C023R032	ranbp-type and c3hc4-type zinc finger-containing protein 1-like	2.02979	-	50	1.7e-75	0.8068	24	C:nucleus; C:cytoplasm; C:LUBAC complex; F:DNA binding; F:ubiquitin-protein transferase activity; F:zinc ion binding; F:UDP-N-acetylmuramoylalanyl-D-glutamyl-2,6-diaminopimelate-D-alanyl-D-alanine ligase activity; F:ribosomal S6-glutamic acid ligase activity; F:ubiquitin binding; F:coenzyme F420-0 gamma-glutamyl ligase activity; F:coenzyme F420-2 alpha-glutamyl ligase activity; F:protein-glycine …	-
C160R132	protein-glutamine gamma-glutamyltransferase k-like	2.02862	-	50	0	0.8044	3	F:protein-glutamine gamma-glutamyltransferase activity; F:metal ion binding; P:peptide cross-linking	-
C148R056	interleukin-1 receptor type 1-like	2.02675	2.20534	50	0	0.5532	3	F:interleukin-1 receptor activity; F:interleukin-1, Type I receptor binding; P:cytokine-mediated signaling pathway	-
C144R003	---NA---	2.02605	1.94913	0	-	-	-	-	-
C106R009	fish virus induced trim protein	2.02394	1.70133	50	3.3e-76	0.797	2	C:intracellular; F:zinc ion binding	-
C114R157	eukaryotic translation initiation factor 4 gamma 1 isoform x2	2.02371	1.84591	50	1.8e-95	0.7332	6	F:protein binding; F:poly(A) RNA binding; P:positive regulation of protein phosphorylation; P:spermatogenesis; P:positive regulation of translation; P:positive regulation of meiosis I	-
C112R015	zinc fingers and homeoboxes protein 3-like	2.02347	1.77892	50	7.9e-163	0.6244	3	C:nucleus; F:DNA binding; F:metal ion binding	-
C128R156	aminopeptidase n-like	2.02301	2.26944	50	9.3e-90	0.8048	4	F:aminopeptidase activity; F:metallopeptidase activity; F:zinc ion binding; P:proteolysis	-
C067R096	ubiquitin-like protein 3	2.02254	1.96746	50	3.1e-42	0.8904	3	C:intracellular; C:plasma membrane; C:extracellular exosome	-
C118R104	eukaryotic translation initiation factor 4e type 3	2.01927	2.27784	50	1e-137	0.8692	5	C:cytoplasm; C:mRNA cap binding complex; F:translation initiation factor activity; P:translational initiation; P:regulation of translation	-
C197R107	uridine-cytidine kinase 1	2.01834	1.99262	50	0	0.8908	7	C:cytosol; F:uridine kinase activity; F:ATP binding; P:pyrimidine nucleobase metabolic process; P:phosphorylation; P:UMP salvage; P:CTP salvage	-
C136R168	interferon gamma receptor 2	2.01647	2.12677	50	3.3e-148	0.5406	2	F:interferon-gamma binding; P:positive regulation of gene expression	-
C121R052	perforin-1-like	2.01647	1.86047	50	0	0.7844	3	C:membrane attack complex; F:protein binding; P:immune response	-
C051R046	protein nlrc5	2.01414	1.49088	50	1.1e-98	0.6354	8	C:cytoplasm; F:nucleotide binding; P:regulation of cytokine-mediated signaling pathway; P:regulation of macromolecule biosynthetic process; P:regulation of cellular metabolic process; P:regulation of innate immune response; P:negative regulation of biological process; P:positive regulation of cellular process	-
C262R079	probable e3 ubiquitin-protein ligase herc3 isoform x1	2.01298	2.39994	50	0	0.7242	2	F:ubiquitin-protein transferase activity; P:protein ubiquitination	-
C248R011	integrin beta-5	2.01275	1.90264	50	2.5e-85	0.8584	4	C:integrin complex; F:receptor activity; P:cell adhesion; P:integrin-mediated signaling pathway	-
C096R035	nfx1-type zinc finger-containing protein 1	2.01205	1.96133	50	9.2e-129	0.739	3	F:ATP binding; F:poly(A) RNA binding; F:metal ion binding	-
C211R090	g patch domain-containing protein 11	2.01159	1.96564	50	3.7e-149	0.8286	1	F:nucleic acid binding	-
C081R113	heat shock 70 kda protein 13	2.01159	1.79709	50	0	0.8376	1	F:ATP binding	-
C060R105	s-antigen partial	2.01112	1.75179	11	5e-14	0.5355	9	C:symbiont-containing vacuole; F:calcium ion binding; F:lipid binding; P:lipid transport; P:lipoprotein metabolic process; C:extracellular region; P:transport; F:semaphorin receptor activity; P:semaphorin-plexin signaling pathway	-
C169R053	e3 ubiquitin-protein ligase trim21-like	2.00903	2.13416	50	3.1e-137	0.727	2	C:intracellular; F:zinc ion binding	-
C110R141	forkhead box protein j2-like	2.00834	1.8391	18	2.5e-28	0.7456	2	F:DNA binding; P:metabolic process	-
C150R002	protein nlrc3-like	2.00718	2.00926	50	3.3e-62	0.6818	1	F:protein binding	-
C215R052	perforin-1-like	2.00671	2.22145	50	0	0.7906	2	C:membrane attack complex; P:immune response	-
C049R010	grb2-associated-binding protein 1 isoform x1	2.00671	1.53581	50	3.9e-149	0.843	11	C:cytoplasm; F:signal transducer activity; P:response to oxidative stress; P:epidermal growth factor receptor signaling pathway; P:activation of JUN kinase activity; P:heart development; P:epidermis development; P:regulation of cell migration; P:platelet-derived growth factor receptor signaling pathway; P:labyrinthine layer development; P:interleukin-6-mediated signaling pathway	-
C252R058	unnamed protein product	2.00324	1.76867	23	9.8e-31	0.7626	10	C:integral component of membrane; F:nucleotide binding; F:calcium ion binding; F:proline racemase activity; F:anion binding; F:metal ion transmembrane transporter activity; P:signal transduction; P:metabolic process; P:metal ion transport; P:transmembrane transport	-
C085R094	cklf-like marvel transmembrane domain-containing protein 7	2.00162	1.96224	50	1.6e-93	0.7954	4	C:integral component of membrane; F:protein kinase activity; F:ATP binding; P:protein phosphorylation	-
C052R142	neuronal acetylcholine receptor subunit alpha-5	2.00092	2.16345	50	5.1e-44	0.6562	13	C:acetylcholine-gated channel complex; C:neuron projection; C:synapse; F:acetylcholine-activated cation-selective channel activity; F:acetylcholine receptor activity; F:acetylcholine binding; P:signal transduction; P:synaptic transmission, cholinergic; P:neuromuscular synaptic transmission; P:response to nicotine; P:regulation of membrane potential; P:neurological system process; P:cation transme…	-
C110R136	serine threonine-protein kinase endoribonuclease ire1-like	1.99954	1.79564	50	0	0.7258	6	F:ribonuclease activity; F:protein kinase activity; F:ATP binding; P:mRNA processing; P:protein phosphorylation; P:RNA phosphodiester bond hydrolysis	-
C174R073	lupus la protein	1.99654	1.91388	50	0	0.8012	7	C:nucleus; C:ribonucleoprotein complex; F:nucleotide binding; F:single-stranded DNA binding; F:RNA binding; P:DNA replication; P:RNA processing	-
C186R142	sterile alpha motif domain-containing protein 9-like	1.99101	1.91986	50	0	0.6056	1	P:regulation of apoptotic process	-
C115R147	---NA---	1.99032	1.54828	0	-	-	-	-	-
C174R015	cap-specific mrna (nucleoside-2 -o-)-methyltransferase 1	1.9894	2.07436	50	0	0.9018	6	C:nucleoplasm; C:cytoplasm; F:nucleic acid binding; F:mRNA (nucleoside-2'-O-)-methyltransferase activity; P:7-methylguanosine mRNA capping; P:cap1 mRNA methylation	-
C203R081	antimicrobial peptide nk-lysin-like	1.98848	1.93746	30	3.9e-26	0.6737	12	C:ruffle; C:focal adhesion; C:myosin complex; F:motor activity; F:protein kinase activity; F:structural constituent of cytoskeleton; F:ATP binding; F:actin filament binding; P:RNA processing; P:protein phosphorylation; P:cytoskeletal anchoring at plasma membrane; P:cell adhesion	-
C077R001	circularly permutated ras protein 1-like	1.98779	1.56121	50	0	0.684	4	F:zinc ion binding; C:COPII vesicle coat; P:ER to Golgi vesicle-mediated transport; P:intracellular protein transport	-
C050R048	antimicrobial peptide nk-lysin-like	1.98687	-	19	2.8e-30	0.6695	3	F:binding; P:lipid metabolic process; P:cellular process	-
C036R064	coiled-coil domain-containing protein 77	1.98618	2.12849	50	1.7e-161	0.8148	2	C:centrosome; C:membrane	-
C117R110	transcription factor maf	1.98618	1.89803	50	1.6e-154	0.9262	4	C:nucleus; F:transcription factor activity, sequence-specific DNA binding; F:sequence-specific DNA binding; P:regulation of transcription, DNA-templated	-
C212R137	mucin-2- partial	1.98573	1.49606	18	2.7e-40	0.4611	-	-	-
C173R120	sterile alpha motif domain-containing protein 9	1.98504	2.41719	50	3.4e-178	0.6556	4	C:cytoplasm; C:intracellular membrane-bounded organelle; F:protein binding; P:single-organism process	-
C170R131	angiotensinogen	1.9832	1.94306	50	0	0.7364	4	C:extracellular space; F:serine-type endopeptidase inhibitor activity; P:regulation of systemic arterial blood pressure by renin-angiotensin; P:negative regulation of endopeptidase activity	-
C126R033	transmembrane protease serine 9-like	1.9832	1.6245	50	4.6e-111	0.7748	2	F:serine-type endopeptidase activity; P:proteolysis	-
C115R119	hepatoma-derived growth factor	1.98137	1.47104	50	5.9e-113	0.8068	12	C:extracellular space; C:nucleoplasm; C:transcriptional repressor complex; F:RNA polymerase II core promoter proximal region sequence-specific DNA binding; F:transcriptional repressor activity, RNA polymerase II core promoter proximal region sequence-specific binding; F:RNA polymerase II transcription corepressor activity; F:transcription corepressor binding; F:growth factor activity; F:poly(A) R…	-
C076R167	choline transporter-like protein 2 isoform x1	1.98023	-	50	2.1e-76	0.9036	2	C:integral component of membrane; P:transport	-
C203R034	fun14 domain-containing protein 1	1.98	1.91476	50	6.3e-92	0.8848	4	C:integral component of mitochondrial outer membrane; F:protein binding; P:mitophagy; P:response to hypoxia	-
C158R060	e3 ubiquitin-protein ligase rnf135	1.98	1.93344	50	2.4e-105	0.6488	2	F:protein binding; F:zinc ion binding	-
C189R143	ras-related c3 botulinum toxin substrate 1	1.97817	2.14305	50	6.9e-124	0.9844	87	C:Golgi membrane; C:phagocytic cup; C:nucleus; C:endoplasmic reticulum membrane; C:trans-Golgi network; C:cytosol; C:actin filament; C:focal adhesion; C:extrinsic component of plasma membrane; C:lamellipodium; C:early endosome membrane; C:ruffle membrane; C:cytoplasmic ribonucleoprotein granule; C:melanosome; C:extracellular exosome; F:nucleic acid binding; F:GTPase activity; F:histone acetyltran…	-
C130R124	histone-lysine n-methyltransferase 2c isoform x7	1.97794	2.00439	50	3.1e-88	0.9382	13	C:histone methyltransferase complex; F:DNA binding; F:protein binding; F:zinc ion binding; F:histone methyltransferase activity (H3-K4 specific); F:poly(A) RNA binding; P:regulation of transcription, DNA-templated; P:single fertilization; P:multicellular organism growth; P:intracellular signal transduction; P:positive regulation of fibroblast proliferation; P:histone H3-K4 methylation; P:eyelid d…	-
C209R071	---NA---	1.97771	1.85232	0	-	-	-	-	-
C199R090	---NA---	1.97748	2.25819	0	-	-	-	-	-
C112R073	collagen alpha-1 chain-like	1.97611	1.85575	10	1.1e-46	0.782	-	-	-
C139R011	cellular tumor antigen p53	1.97589	1.71852	50	6.6e-69	0.686	32	C:nucleus; C:macromolecular complex; C:chromosomal part; C:cytoplasmic part; F:transcription factor activity, sequence-specific DNA binding; F:protein binding; F:sequence-specific DNA binding; F:transcription regulatory region DNA binding; F:metal ion binding; P:DNA damage checkpoint; P:regulation of transcription from RNA polymerase II promoter; P:autophagy; P:DNA damage response, signal transdu…	-
C051R148	---NA---	1.97566	1.98687	0	-	-	-	-	-
C122R152	peroxidasin homolog	1.97543	1.81085	50	0	0.5818	1	F:protein binding	-
C051R066	circularly permutated ras protein 1-like	1.97497	2.08373	50	2.5e-84	0.7256	4	F:zinc ion binding; C:COPII vesicle coat; P:ER to Golgi vesicle-mediated transport; P:intracellular protein transport	-
C262R055	cullin-9 isoform x1	1.97452	1.93098	50	1.1e-69	0.808	4	C:cullin-RING ubiquitin ligase complex; F:zinc ion binding; F:ubiquitin protein ligase binding; P:ubiquitin-dependent protein catabolic process	-
C214R141	unnamed protein product	1.97361	1.73047	6	3.7e-16	0.725	3	C:membrane; F:calcium ion binding; P:single-organism transport	-
C095R128	---NA---	1.97178	1.80604	0	-	-	-	-	-
C169R121	rna-binding protein 43	1.9711	2.03097	50	0	0.5298	2	F:nucleotide binding; F:nucleic acid binding	-
C260R144	interaptin-like isoform x1	1.96996	2.50794	5	1.1e-91	0.604	1	F:hydrolase activity	-
C032R110	choline ethanolaminephosphotransferase 1 isoform x1	1.96882	2.01601	50	0	0.9148	10	C:extracellular region; C:endoplasmic reticulum membrane; C:integral component of membrane; C:nuclear membrane; F:diacylglycerol cholinephosphotransferase activity; F:ethanolaminephosphotransferase activity; F:hormone activity; F:metal ion binding; P:phosphatidylethanolamine biosynthetic process; P:CDP-choline pathway	-
C200R156	dual adapter for phosphotyrosine and 3-phosphotyrosine and 3-phosphoinositide	1.96882	1.70133	50	1.9e-177	0.8844	6	C:plasma membrane; C:phosphatidylinositol 3-kinase complex; F:phosphatidylinositol-3,4,5-trisphosphate binding; F:phosphatidylinositol 3-kinase regulator activity; F:phosphatidylinositol-3,4-bisphosphate binding; P:regulation of phosphatidylinositol 3-kinase activity	-
C071R159	g-protein coupled receptor 4-like	1.9686	2.10697	50	3.5e-121	0.6522	4	C:integral component of membrane; F:G-protein coupled receptor activity; F:kinase activity; P:G-protein coupled receptor signaling pathway	-
C198R005	linker for activation of t-cells family member 1-like	1.96746	1.82555	2	1.1e-14	0.635	-	-	-
C225R148	ankyrin repeat family a protein 2	1.96723	2.34459	50	1.3e-100	0.9544	10	C:nucleus; C:cytosol; C:cytoskeleton; C:membrane; F:transcription cofactor activity; F:aspartic-type endopeptidase activity; F:low-density lipoprotein particle binding; F:histone deacetylase binding; P:regulation of transcription from RNA polymerase II promoter; P:proteolysis	-
C040R069	ubiquitin carboxyl-terminal hydrolase 4 isoform x1	1.96678	2.2958	50	0	0.8802	15	C:nucleus; C:cytoplasm; C:plasma membrane; F:cysteine-type endopeptidase activity; F:ubiquitin-specific protease activity; F:adenosine receptor binding; F:identical protein binding; F:metal ion binding; P:spliceosomal tri-snRNP complex assembly; P:protein deubiquitination; P:negative regulation of protein ubiquitination; P:regulation of protein stability; P:protein localization to cell surface; P…	-
C072R098	profilin-2-like isoform x1	1.96541	1.8652	50	3.6e-96	0.928	2	F:actin binding; P:regulation of actin filament polymerization	-
C206R007	protein unc-93 homolog b1	1.96405	1.7884	50	2.9e-160	0.8648	6	C:endoplasmic reticulum; P:antigen processing and presentation of exogenous peptide antigen via MHC class II; P:regulation of toll-like receptor signaling pathway; P:toll-like receptor 3 signaling pathway; P:toll-like receptor 7 signaling pathway; P:toll-like receptor 9 signaling pathway	-
C095R015	#NAME?	1.96314	1.8989	50	1.4e-109	0.8284	5	C:nucleus; F:sequence-specific DNA binding; P:sprouting angiogenesis; P:regulation of transcription, DNA-templated; P:cell differentiation in spinal cord	-
C166R096	probable g-protein coupled receptor 34	1.96156	1.79813	50	1.1e-125	0.6274	3	C:integral component of membrane; F:G-protein coupled receptor activity; P:G-protein coupled receptor signaling pathway	-
C105R117	---NA---	1.9611	1.54685	0	-	-	-	-	-
C012R085	canalicular multispecific organic anion transporter 2	1.95907	1.46476	50	0	0.9198	5	C:integral component of membrane; F:ATP binding; F:ATPase activity, coupled to transmembrane movement of substances; P:metabolic process; P:transmembrane transport	-
C153R056	p53 apoptosis effector related to pmp-22	1.95748	1.96541	50	1.2e-89	0.789	5	C:bicellular tight junction; C:integral component of membrane; F:structural molecule activity; P:response to UV; P:regulation of apoptotic process	-
C123R146	signal transducer and activator of transcription 2	1.95658	1.67153	50	4.2e-133	0.7174	7	C:nucleus; C:cytoplasm; F:DNA binding; F:transcription factor activity, sequence-specific DNA binding; F:signal transducer activity; P:regulation of transcription, DNA-templated; P:signal transduction	-
C209R085	fish virus induced trim protein	1.95568	1.67095	50	3.7e-85	0.6924	2	F:protein binding; F:zinc ion binding	-
C002R141	amphoterin-induced protein 2	1.95545	2.07388	50	0	0.5916	5	C:integral component of plasma membrane; F:protein binding; P:cell adhesion; P:axonal fasciculation; P:myelination	-
C166R022	gon-4-like protein	1.95432	1.97771	50	4.8e-83	0.7552	2	F:DNA binding; P:regulation of transcription, DNA-templated	-
C041R002	glucoside xylosyltransferase 2	1.95364	2.03261	50	1.5e-130	0.751	2	F:UDP-xylosyltransferase activity; P:O-glycan processing	-
C111R064	---NA---	1.95364	1.85575	0	-	-	-	-	-
C230R063	ubiquitin-like modifier-activating enzyme 1	1.95297	1.73147	50	4.3e-61	0.8294	17	C:heterochromatin; C:nucleus; C:mitochondrion; C:lysosomal membrane; C:cytosol; C:endosome membrane; C:desmosome; C:rough endoplasmic reticulum membrane; C:extracellular exosome; F:ubiquitin activating enzyme activity; F:ubiquitin-protein transferase activity; F:protein binding; F:ATP binding; F:poly(A) RNA binding; P:cellular response to DNA damage stimulus; P:protein ubiquitination; P:modificat…	-
C117R109	centrosomal protein of 95 kda	1.95251	2.08565	50	6.3e-108	0.8916	2	C:spindle pole; C:centrosome	-
C027R164	beta-catenin-like protein 1	1.95206	2.27495	50	0	0.949	7	C:Prp19 complex; C:nucleoplasm; C:spliceosomal complex; C:membrane; F:enzyme binding; P:somatic diversification of immunoglobulins; P:positive regulation of apoptotic process	-
C036R158	tumor suppressor candidate 2	1.95094	1.91565	50	3e-71	0.8546	7	P:regulation of cytokine production; P:immune system process; P:cell differentiation; P:symbiosis, encompassing mutualism through parasitism; P:anatomical structure development; P:defense response to Gram-negative bacterium; P:regulation of biological quality	-
C046R038	interferon-induced protein 44-like	1.95071	2.11844	50	0	0.8464	1	F:GTP binding	-
C100R161	---NA---	1.95026	1.87363	0	-	-	-	-	-
C088R099	adenosine deaminase	1.94981	-	50	0	0.8556	36	C:lysosome; C:external side of plasma membrane; C:cell junction; C:cytoplasmic membrane-bounded vesicle lumen; F:adenosine deaminase activity; F:zinc ion binding; P:response to hypoxia; P:liver development; P:germinal center B cell differentiation; P:positive regulation of germinal center formation; P:negative regulation of leukocyte migration; P:negative regulation of mature B cell apoptotic pro…	-
C010R091	nfx1-type zinc finger-containing protein 1	1.94711	1.94104	50	0	0.7688	6	C:nucleus; F:nucleotide binding; F:transcription factor activity, sequence-specific DNA binding; F:zinc ion binding; F:poly(A) RNA binding; P:regulation of transcription, DNA-templated	-
C189R002	copper transport protein atox1	1.94711	-	50	9.9e-40	0.888	6	C:cytoplasm; F:copper chaperone activity; F:copper-dependent protein binding; P:cellular copper ion homeostasis; P:response to oxidative stress; P:intracellular copper ion transport	-
C042R087	vascular cell adhesion protein 1-like	1.94643	2.14503	50	1.4e-97	0.559	1	F:protein binding	-
C088R157	secretory carrier-associated membrane protein 4	1.94486	2.15149	50	3e-141	0.8448	2	C:integral component of membrane; P:protein transport	-
C064R158	---NA---	1.94217	2.22633	0	-	-	-	-	-
C050R045	er degradation-enhancing alpha-mannosidase-like protein 3 isoform x2	1.94082	1.72987	50	4.7e-110	0.7204	2	F:mannosyl-oligosaccharide mannosidase activity; F:alpha-glucosidase activity	-
C189R060	ranbp-type and c3hc4-type zinc finger-containing protein 1	1.9406	1.74735	50	0	0.7514	6	F:protein binding; F:zinc ion binding; P:positive regulation of signal transduction; P:regulation of programmed cell death; P:cellular protein metabolic process; P:embryonic cranial skeleton morphogenesis	-
C040R107	pleckstrin homology domain-containing family f member 1	1.94015	1.82956	50	0	0.7104	3	F:metal ion binding; F:phosphatidylinositol phosphate binding; P:cellular component organization	-
C033R043	e3 ubiquitin-protein ligase trim21-like	1.93925	2.41915	50	6.5e-24	0.6752	3	C:cytoplasm; F:metal ion binding; F:ubiquitin protein ligase activity	-
C141R105	rho guanine nucleotide exchange factor 6 isoform x2	1.93903	1.76602	50	5.7e-82	0.8452	21	C:cytosol; C:focal adhesion; C:lamellipodium; C:neuron projection; C:neuronal cell body; C:protein complex; F:Rho guanyl-nucleotide exchange factor activity; F:protein kinase binding; P:axon guidance; P:positive regulation of fibroblast migration; P:lamellipodium assembly; P:regulation of Rho protein signal transduction; P:negative regulation of epidermal growth factor receptor signaling pathway;…	-
C209R139	homocysteine-responsive endoplasmic reticulum-resident ubiquitin-like domain member 2 protein	1.93836	1.9223	50	3.1e-135	0.6876	5	P:spermatogenesis; F:molecular_function; P:response to unfolded protein; C:integral component of membrane; C:membrane	-
C216R128	lysosomal alpha-mannosidase	1.93701	1.95342	50	4.2e-109	0.7378	17	C:vacuolar membrane; F:zinc ion binding; F:lytic transglycosylase activity; F:mannosyl-oligosaccharide mannosidase activity; F:galactosidase activity; F:trehalase activity; F:fucosidase activity; F:hexosaminidase activity; F:amylase activity; F:carbohydrate binding; F:dextrin alpha-glucosidase activity; F:starch alpha-glucosidase activity; F:beta-glucanase activity; F:beta-6-sulfate-N-acetylgluco…	-
C233R064	spectrin alpha non-erythrocytic 1 isoform x1	1.93701	1.72788	50	0	0.9732	2	F:calcium ion binding; F:protein binding	-
C256R136	eukaryotic translation initiation factor 3 subunit j	1.93567	1.89321	50	7.6e-83	0.8694	7	C:eukaryotic translation initiation factor 3 complex; C:eukaryotic 43S preinitiation complex; C:eukaryotic 48S preinitiation complex; F:translation initiation factor activity; P:formation of translation preinitiation complex; P:cytoplasmic translation; P:regulation of translational initiation	-
C018R139	uridine-cytidine kinase 1	1.93522	2.2413	50	8.9e-59	0.8928	7	C:cytosol; F:uridine kinase activity; F:ATP binding; P:pyrimidine nucleobase metabolic process; P:phosphorylation; P:UMP salvage; P:CTP salvage	-
C065R091	fish virus induced trim protein	1.93478	1.88666	50	1.2e-77	0.917	2	C:intracellular; F:zinc ion binding	-
C222R070	---NA---	1.93411	1.84506	0	-	-	-	-	-
C220R107	---NA---	1.93344	1.37745	0	-	-	-	-	-
C254R164	skin secretory protein xp2-like	1.93143	1.73748	46	8.2e-19	0.4896	-	-	-
C173R036	histidine triad nucleotide-binding protein 3	1.93098	2.59098	50	3.6e-121	0.541	2	F:catalytic activity; P:metabolic process	-
C191R081	---NA---	1.93076	2.01624	0	-	-	-	-	-
C077R053	---NA---	1.92942	1.67404	0	-	-	-	-	-
C246R149	cytokine receptor common subunit gamma-like	1.92853	1.98618	50	0	0.6058	6	C:membrane; C:cell part; F:cytokine receptor activity; F:protein binding; P:transmembrane receptor protein tyrosine kinase signaling pathway; P:cytokine-mediated signaling pathway	-
C160R038	---NA---	1.92741	2.0941	0	-	-	-	-	-
C204R170	sulfotransferase family cytosolic 2b member 1-like	1.92741	1.89015	50	2.7e-114	0.817	19	F:N-acetylglucosamine 6-O-sulfotransferase activity; F:N-acetylgalactosamine 4-O-sulfotransferase activity; F:heparan sulfate 2-O-sulfotransferase activity; F:HNK-1 sulfotransferase activity; F:sulfurtransferase activity; F:heparan sulfate 6-O-sulfotransferase activity; F:trans-9R,10R-dihydrodiolphenanthrene sulfotransferase activity; F:1-phenanthrol sulfotransferase activity; F:3-phenanthrol sul…	-
C255R135	ubiquitin-like modifier-activating enzyme 1	1.92652	1.96973	50	4.3e-110	0.7918	17	C:heterochromatin; C:nucleus; C:mitochondrion; C:lysosomal membrane; C:cytosol; C:endosome membrane; C:desmosome; C:rough endoplasmic reticulum membrane; C:extracellular exosome; F:ubiquitin activating enzyme activity; F:ubiquitin-protein transferase activity; F:protein binding; F:ATP binding; F:poly(A) RNA binding; P:cellular response to DNA damage stimulus; P:protein ubiquitination; P:modificat…	-
C059R101	chromatin target of prmt1 protein	1.92652	1.79461	50	5e-35	0.9348	9	C:transcription export complex; C:nucleolus; C:nuclear speck; F:protein binding; F:poly(A) RNA binding; P:regulation of transcription, DNA-templated; P:mRNA export from nucleus; P:positive regulation of ATPase activity; P:positive regulation of helicase activity	-
C076R023	5 -amp-activated protein kinase catalytic subunit alpha-1	1.92608	-	50	4.7e-110	0.8848	55	C:nucleoplasm; C:cytosol; C:apical plasma membrane; C:AMP-activated protein kinase complex; F:chromatin binding; F:AMP-activated protein kinase activity; F:cAMP-dependent protein kinase activity; F:ATP binding; F:protein C-terminus binding; F:kinase binding; F:histone serine kinase activity; F:metal ion binding; F:[hydroxymethylglutaryl-CoA reductase (NADPH)] kinase activity; F:tau-protein kinase…	-
C163R118	macrophage mannose receptor 1-like isoform x1	1.92408	1.70645	50	1.1e-57	0.6896	-	-	-
C203R074	tripartite motif-containing protein 47-like	1.92208	2.18682	50	1.1e-99	0.5524	3	C:intracellular; F:protein binding; F:zinc ion binding	-
C100R094	e3 ubiquitin-protein ligase rnf170-like	1.92186	1.8321	50	1.7e-162	0.8466	14	C:endoplasmic reticulum membrane; C:integral component of membrane; F:protein binding; F:zinc ion binding; F:UDP-N-acetylmuramoylalanyl-D-glutamyl-2,6-diaminopimelate-D-alanyl-D-alanine ligase activity; F:ribosomal S6-glutamic acid ligase activity; F:coenzyme F420-0 gamma-glutamyl ligase activity; F:coenzyme F420-2 alpha-glutamyl ligase activity; F:protein-glycine ligase activity, initiating; F:p…	-
C258R158	zinc finger protein dpf3-like	1.92163	2.07748	50	0	0.7688	11	C:SWI/SNF complex; C:nBAF complex; F:nucleic acid binding; F:histone binding; F:metal ion binding; P:positive regulation of defense response to virus by host; P:regulation of transcription, DNA-templated; P:nervous system development; P:chromatin modification; P:cardiac muscle tissue morphogenesis; P:mitophagy in response to mitochondrial depolarization	-
C193R152	cap-gly domain-containing linker protein 3	1.91897	1.63392	50	1.5e-53	0.8924	20	C:Golgi stack; C:plasma membrane; C:early endosome membrane; C:trans-Golgi network membrane; C:membrane raft; C:recycling endosome membrane; F:microtubule binding; F:oxidoreductase activity, acting on paired donors, with incorporation or reduction of molecular oxygen, 2-oxoglutarate as one donor, and incorporation of one atom each of oxygen into both donors; F:ganglioside binding; P:positive regu…	-
C127R051	purine nucleoside phosphorylase-like	1.91875	1.77461	50	2e-139	0.9102	17	C:cytoplasm; C:extracellular exosome; F:nucleoside binding; F:purine nucleobase binding; F:purine-nucleoside phosphorylase activity; F:drug binding; F:phosphate ion binding; P:inosine catabolic process; P:nicotinamide riboside catabolic process; P:immune response; P:NAD biosynthesis via nicotinamide riboside salvage pathway; P:urate biosynthetic process; P:positive regulation of T cell proliferat…	-
C045R057	heparan-alpha-glucosaminide n-acetyltransferase	1.91786	2.03872	50	1.3e-91	0.9116	5	C:lysosomal membrane; F:transferase activity, transferring acyl groups; P:lysosomal transport; P:metabolic process; P:protein oligomerization	-
C012R158	coiled-coil domain-containing protein 71	1.91764	1.94958	50	5.5e-93	0.7864	-	-	-
C232R157	dnaj homolog subfamily c member 7	1.91609	1.94756	50	0	0.9296	6	C:nucleoplasm; C:cytoplasm; C:membrane; C:extracellular exosome; F:heat shock protein binding; P:chaperone cofactor-dependent protein refolding	-
C134R163	interleukin-31 receptor subunit alpha	1.91609	1.64547	50	0	0.5322	1	F:protein binding	-
C036R058	c-type lectin domain family 10 member a-like	1.9159	1.8919	50	9.2e-31	0.6484	3	F:carbohydrate binding; P:biological_process; C:cellular_component	-
C099R165	microtubule-associated proteins 1a 1b light chain 3b	1.91587	1.77933	50	6.3e-74	0.9708	16	C:pre-autophagosomal structure; C:autophagosome membrane; C:mitochondrion; C:cytosol; C:microtubule; C:axoneme; C:endomembrane system; C:extrinsic component of membrane; C:cytoplasmic vesicle; F:microtubule binding; F:ubiquitin protein ligase binding; P:autophagosome assembly; P:cellular response to nitrogen starvation; P:nucleophagy; P:membrane fusion; P:regulation of mitophagy	-
C053R048	upf0415 protein c7orf25 homolog	1.91565	2.40827	50	0	0.7966	1	F:protein binding	-
C127R089	microspherule protein 1 isoform x1	1.91543	1.70586	5	1.7e-06	1	-	-	-
C066R007	metalloproteinase inhibitor 2	1.91344	2.2974	50	7.7e-96	0.7252	11	C:proteinaceous extracellular matrix; C:extracellular space; F:protease binding; F:metalloendopeptidase inhibitor activity; F:FBXO family protein binding; P:response to hormone; P:negative regulation of endopeptidase activity; P:regulation of phosphate metabolic process; P:response to cytokine; P:negative regulation of metalloenzyme activity; P:negative regulation of membrane protein ectodomain p…	-
C156R044	tumor necrosis factor receptor superfamily member 8	1.91344	2.01042	50	7.4e-153	0.6078	7	C:membrane; F:transmembrane signaling receptor activity; F:protein binding; P:vasculature development; P:immune response; P:signal transduction; P:regulation of cysteine-type endopeptidase activity involved in apoptotic process	-
C073R095	dnaj homolog subfamily c member 7	1.913	1.78036	50	2.4e-74	0.8872	7	C:nucleoplasm; C:cytoplasm; C:cytoskeleton; C:membrane; C:extracellular exosome; F:heat shock protein binding; P:chaperone cofactor-dependent protein refolding	-
C001R061	fun14 domain-containing protein 1	1.91167	2.04368	50	3.6e-90	0.8774	4	C:integral component of mitochondrial outer membrane; F:protein binding; P:mitophagy; P:response to hypoxia	-
C028R152	myelin-associated glyco	1.91167	1.79315	50	0	0.6534	2	C:integral component of membrane; F:protein binding	-
C243R131	---NA---	1.91079	1.82809	0	-	-	-	-	-
C263R063	---NA---	1.91035	1.98046	0	-	-	-	-	-
C206R084	phospholipid scramblase 3	1.91012	1.60251	50	6.5e-173	0.869	3	C:plasma membrane; F:phospholipid scramblase activity; P:phospholipid scrambling	-
C092R059	eukaryotic initiation factor 4a-ii isoform x1	1.90902	1.88818	50	0	0.965	14	C:cytosol; C:eukaryotic translation initiation factor 4F complex; C:perinuclear region of cytoplasm; F:translation initiation factor activity; F:ATP-dependent RNA helicase activity; F:protein binding; F:ATP binding; F:poly(A) RNA binding; P:nuclear-transcribed mRNA poly(A) tail shortening; P:regulation of translational initiation; P:RNA secondary structure unwinding; P:viral process; P:cytokine-m…	-
C168R138	sodium- and chloride-dependent taurine transporter-like	1.9088	1.51432	50	0	0.922	6	C:integral component of plasma membrane; F:neurotransmitter:sodium symporter activity; F:taurine:sodium symporter activity; P:amino acid transmembrane transport; P:neurotransmitter transport; P:taurine transport	-
C030R068	calcineurin b homologous protein 2	1.90858	2.28443	50	1.8e-112	0.8064	5	C:intracellular part; F:calcium ion binding; P:positive regulation of macromolecule metabolic process; P:positive regulation of cellular metabolic process; P:regulation of primary metabolic process	-
C173R139	heat shock 70 kda protein 4-like	1.90858	1.90374	50	0	0.9356	1	F:ATP binding	-
C148R016	ubiquinone biosynthesis protein coq4 mitochondrial	1.90594	1.74493	50	3.9e-77	0.6774	2	C:mitochondrial inner membrane; P:ubiquinone biosynthetic process	-
C148R120	unnamed protein product	1.9055	1.60845	6	5e-11	0.7883	9	C:SWI/SNF complex; F:DNA binding; F:transposase activity; F:ATP binding; F:ATPase activity; P:transposition, DNA-mediated; P:regulation of transcription, DNA-templated; P:DNA integration; P:ATP-dependent chromatin remodeling	-
C084R138	beta- -glucosyltransferase	1.90374	3.29741	50	0	0.849	6	C:extracellular region; C:membrane; F:calcium ion binding; F:transferase activity, transferring glycosyl groups; P:cell-matrix adhesion; P:metabolic process	-
C222R075	cyclin-g2-like	1.90352	2.00787	50	0	0.823	1	P:regulation of cell cycle	-
C013R072	ninjurin-1	1.90308	1.6131	50	2.2e-73	0.8154	3	C:integral component of membrane; P:cell adhesion; P:tissue regeneration	-
C145R102	interferon-induced guanylate-binding protein 1-like	1.90308	1.53475	50	6.1e-133	0.8306	13	C:Golgi cis cisterna; C:Golgi membrane; C:endoplasmic reticulum membrane; C:integral component of membrane; C:axon; F:GTPase activity; F:GTP binding; F:identical protein binding; P:endoplasmic reticulum organization; P:axonogenesis; P:metabolic process; P:protein homooligomerization; P:defense response to virus	-
C229R025	ubiquitin-like modifier-activating enzyme 1	1.90132	1.50039	50	8.6e-105	0.7922	17	C:heterochromatin; C:nucleus; C:mitochondrion; C:lysosomal membrane; C:cytosol; C:endosome membrane; C:desmosome; C:rough endoplasmic reticulum membrane; C:extracellular exosome; F:ubiquitin activating enzyme activity; F:ubiquitin-protein transferase activity; F:protein binding; F:ATP binding; F:poly(A) RNA binding; P:cellular response to DNA damage stimulus; P:protein ubiquitination; P:modificat…	-
C125R121	upf0729 protein c18orf32 homolog	1.90044	1.76316	50	1.3e-55	0.7674	3	C:ribonucleoprotein complex; F:signal transducer activity; P:positive regulation of I-kappaB kinase/NF-kappaB signaling	-
C011R032	---NA---	1.89781	1.96723	0	-	-	-	-	-
C108R029	---NA---	1.89759	1.94194	0	-	-	-	-	-
C021R100	interferon regulatory factor 1	1.89627	1.61589	50	0	0.6856	8	C:nucleus; F:regulatory region DNA binding; F:transcription factor activity, sequence-specific DNA binding; P:regulation of transcription, DNA-templated; P:apoptotic process; P:negative regulation of cell proliferation; P:response to peptide hormone; P:regulation of immune response	-
C121R066	camp-responsive element modulator isoform x3	1.89474	1.65883	50	2.4e-156	0.767	18	C:nucleus; C:transcription factor complex; C:cytoplasm; F:core promoter sequence-specific DNA binding; F:transcription factor activity, sequence-specific DNA binding; F:cAMP response element binding protein binding; P:glucose metabolic process; P:fatty acid metabolic process; P:glycosphingolipid metabolic process; P:spermatogenesis; P:cAMP-mediated signaling; P:circadian regulation of gene expres…	-
C178R130	nuclear factor nf-kappa-b p105 subunit	1.89452	1.68588	50	0	0.7314	61	C:nucleoplasm; C:mitochondrion; C:cytosol; C:I-kappaB/NF-kappaB complex; C:neuron projection; F:RNA polymerase II distal enhancer sequence-specific DNA binding; F:transcriptional activator activity, RNA polymerase II distal enhancer sequence-specific binding; F:transcriptional repressor activity, RNA polymerase II transcription regulatory region sequence-specific binding; F:chromatin binding; F:t…	-
C090R035	---NA---	1.8908	1.82408	0	-	-	-	-	-
C215R046	transposable element tc1 partial	1.89059	1.90264	50	8.3e-84	0.6818	12	C:integral component of membrane; C:SWI/SNF complex; F:DNA binding; F:transposase activity; F:ATP binding; F:mechanically-gated ion channel activity; F:ATPase activity; P:transposition, DNA-mediated; P:regulation of transcription, DNA-templated; P:DNA integration; P:ion transmembrane transport; P:ATP-dependent chromatin remodeling	-
C130R068	---NA---	1.89015	1.65366	0	-	-	-	-	-
C191R024	e3 ubiquitin-protein ligase trim21-like	1.88928	1.72668	50	1.1e-152	0.7912	6	C:intracellular; F:ubiquitin-protein transferase activity; F:protein binding; F:zinc ion binding; F:ligase activity; P:protein ubiquitination	-
C071R084	zinc-binding protein a33-like	1.88884	1.96246	50	6.5e-38	0.624	2	C:intracellular; F:zinc ion binding	-
C218R049	alpha beta hydrolase domain-containing protein 14b	1.88862	-	50	1.4e-135	0.8254	4	C:nucleus; C:cytoplasm; F:hydrolase activity; P:metabolic process	-
C019R148	regulator of g-protein signaling 1-like	1.88818	1.83868	50	9e-119	0.8464	1	P:termination of G-protein coupled receptor signaling pathway	-
C179R090	---NA---	1.88797	1.80146	0	-	-	-	-	-
C014R104	cklf-like marvel transmembrane domain-containing protein 7	1.88797	1.78489	50	2.2e-96	0.7888	4	C:integral component of membrane; F:protein kinase activity; F:ATP binding; P:protein phosphorylation	-
C134R112	e3 ubiquitin-protein ligase rnf138 isoform x1	1.88513	2.21146	50	1.8e-135	0.4902	4	F:protein binding; F:zinc ion binding; F:acid-amino acid ligase activity; P:metabolic process	-
C228R125	twinfilin-1	1.88492	2.01834	50	0	0.8796	16	C:cell-cell junction; C:focal adhesion; C:actin cytoskeleton; C:myofibril; C:filopodium; C:ruffle membrane; C:perinuclear region of cytoplasm; F:actin monomer binding; F:protein tyrosine kinase activity; F:ATP binding; F:phosphatidylinositol-4,5-bisphosphate binding; F:protein complex binding; P:peptidyl-tyrosine phosphorylation; P:sequestering of actin monomers; P:regulation of actin phosphoryla…	-
C266R131	myeloid differentiation primary response protein 88	1.88426	1.98917	50	0	0.8746	8	C:cytoplasm; F:oxidoreductase activity; F:TIR domain binding; P:response to molecule of bacterial origin; P:MyD88-dependent toll-like receptor signaling pathway; P:inflammatory response; P:positive regulation of I-kappaB kinase/NF-kappaB signaling; P:oxidation-reduction process	-
C135R006	denn domain-containing protein 2d isoform x1	1.88426	-	50	0	0.8024	3	F:molecular_function; P:biological_process; C:cellular_component	-
C203R092	lrr and pyd domains-containing protein 12-like	1.88383	1.58045	50	1.1e-53	0.7042	3	F:protein binding; F:ATP binding; P:regulation of apoptotic process	-
C015R072	interferon gamma receptor 2	1.88209	1.67037	39	0	0.5344	2	F:interferon-gamma binding; P:positive regulation of gene expression	-
C249R112	zinc-binding protein a33-like	1.88187	1.92008	50	2.9e-135	0.6774	3	C:intracellular; F:protein binding; F:zinc ion binding	-
C045R067	antigen peptide transporter 1	1.88143	1.57826	50	1.9e-49	0.7842	10	C:lysosomal membrane; C:TAP complex; F:ATP binding; F:peptide-transporting ATPase activity; F:MHC protein binding; F:TAP2 binding; P:metabolic process; P:peptide transport; P:antigen processing and presentation of endogenous peptide antigen via MHC class I; P:transmembrane transport	-
C089R124	e3 ubiquitin-protein ligase lrsam1 isoform x1	1.87991	2.07556	50	0	0.7716	9	C:cytoplasm; C:membrane; F:ubiquitin-protein transferase activity; F:zinc ion binding; P:negative regulation of endocytosis; P:viral budding; P:neuron development; P:protein autoubiquitination; P:ubiquitin-dependent endocytosis	-
C198R097	sh3 domain-binding glutamic acid-rich-like protein	1.87948	2.31471	50	8.9e-72	0.8916	2	C:extracellular space; C:extracellular exosome	-
C117R085	run and fyve domain-containing protein 2 isoform x2	1.87905	1.90044	50	4.9e-16	0.976	1	F:metal ion binding	-
C010R093	e3 ubiquitin-protein ligase trim21-like	1.87709	1.80063	50	3e-29	0.8598	6	C:intracellular; F:ubiquitin-protein transferase activity; F:protein binding; F:zinc ion binding; F:ligase activity; P:protein ubiquitination	-
C051R142	ubiquitin carboxyl-terminal hydrolase 19 isoform x3	1.87601	2.13194	50	2.4e-63	0.8896	8	C:cytoplasm; F:cysteine-type endopeptidase activity; F:ubiquitin-specific protease activity; F:metal ion binding; P:protein deubiquitination; P:central nervous system morphogenesis; P:ER-associated ubiquitin-dependent protein catabolic process; P:regulation of proteasomal protein catabolic process	-
C219R022	xiap-associated factor 1	1.87558	1.38863	50	3.4e-163	0.6008	1	F:zinc ion binding	-
C210R100	glutamate-rich wd repeat-containing protein 1	1.87493	1.79606	50	8.3e-115	0.8806	4	C:nucleolus; C:cytoplasm; F:protein binding; F:poly(A) RNA binding	-
C211R012	heat shock 70 kda protein 4-like	1.87493	1.6976	50	0	0.8754	1	F:ATP binding	-
C176R029	---NA---	1.87471	1.58227	0	-	-	-	-	-
C208R107	eukaryotic translation initiation factor 1b	1.87276	2.45235	50	2e-32	0.9316	7	C:nucleus; C:cytoplasm; F:translation initiation factor activity; F:protein binding; F:poly(A) RNA binding; P:regulation of translational initiation; P:dosage compensation by inactivation of X chromosome	-
C003R094	cullin-9 isoform x2	1.87146	2.05647	50	0	0.8238	4	C:cullin-RING ubiquitin ligase complex; F:zinc ion binding; F:ubiquitin protein ligase binding; P:ubiquitin-dependent protein catabolic process	-
C160R063	cap-gly domain-containing linker protein 1 isoform x1	1.86714	1.78283	50	0	0.7976	-	-	-
C213R153	mpv17-like protein	1.8665	1.78118	50	8.6e-160	0.828	1	C:integral component of membrane	-
C121R111	tnfaip3-interacting protein 1 isoform x1	1.8652	1.80125	50	0	0.7396	2	F:molecular_function; C:cellular_component	-
C050R034	ras-related protein r-ras2	1.86434	1.80751	50	3e-114	0.8874	22	C:endoplasmic reticulum; C:plasma membrane; C:focal adhesion; C:extracellular exosome; F:GTPase activity; F:GTP binding; F:GDP binding; F:protein complex binding; P:osteoblast differentiation; P:leukocyte differentiation; P:intracellular protein transport; P:nucleocytoplasmic transport; P:Notch signaling pathway; P:Ras protein signal transduction; P:positive regulation of cell migration; P:negati…	-
C128R041	tpa: transposase	1.86197	1.77563	50	5.8e-108	0.7916	5	F:DNA binding; F:transposase activity; P:transposition, DNA-mediated; P:neuron-neuron synaptic transmission; P:DNA integration	-
C031R145	gdnf family receptor alpha-4-like	1.86133	2.13095	50	4.7e-131	0.7832	2	F:receptor activity; P:branchiomeric skeletal muscle development	-
C109R126	dna damage-inducible transcript 4-like protein	1.85811	1.91145	50	1e-98	0.6516	2	C:cytoplasm; P:negative regulation of signal transduction	-
C078R124	zinc finger and btb domain-containing protein 10	1.85596	2.77214	50	1.6e-37	0.87	5	C:nucleoplasm; F:DNA binding; F:protein binding; F:metal ion binding; P:regulation of transcription, DNA-templated	-
C242R091	---NA---	1.85575	1.97087	0	-	-	-	-	-
C240R085	nad kinase mitochondrial isoform x2	1.85553	1.78674	50	1.2e-69	0.8434	6	C:mitochondrion; F:NAD+ kinase activity; F:protein homodimerization activity; P:NADP biosynthetic process; P:phosphorylation; P:NAD metabolic process	-
C145R098	lysophosphatidic acid receptor 6-like	1.85253	2.3249	50	0	0.7028	3	C:integral component of membrane; F:G-protein coupled receptor activity; P:G-protein coupled receptor signaling pathway	-
C002R119	---NA---	1.85082	2.1848	0	-	-	-	-	-
C164R120	suppressor of cytokine signaling 6	1.8504	1.89715	50	2.4e-18	1	19	C:immunological synapse; C:nucleolus; C:cytoplasm; F:protein kinase inhibitor activity; F:SH3 domain binding; P:cellular glucose homeostasis; P:defense response; P:negative regulation of epidermal growth factor-activated receptor activity; P:insulin receptor signaling pathway; P:protein ubiquitination; P:cytokine-mediated signaling pathway; P:layer formation in cerebral cortex; P:radial glia guid…	-
C266R129	tyrosine-protein kinase jak1	1.85018	2.02394	50	0	0.7246	28	C:nucleus; C:cytosol; C:cytoskeleton; C:focal adhesion; C:extrinsic component of cytoplasmic side of plasma membrane; F:non-membrane spanning protein tyrosine kinase activity; F:growth hormone receptor binding; F:ATP binding; F:protein phosphatase binding; F:ubiquitin protein ligase binding; F:CCR5 chemokine receptor binding; P:activation of MAPKK activity; P:epidermal growth factor receptor sign…	-
C043R090	---NA---	1.85018	1.55204	0	-	-	-	-	-
C029R077	urea transporter 2-like	1.84997	2.14801	50	1.4e-161	0.7186	3	C:integral component of plasma membrane; F:urea channel activity; P:urea transmembrane transport	-
C005R018	nfx1-type zinc finger-containing protein 1	1.8489	1.50091	50	5.1e-157	0.799	6	C:nucleus; F:transcription factor activity, sequence-specific DNA binding; F:ATP binding; F:zinc ion binding; F:poly(A) RNA binding; P:regulation of transcription, DNA-templated	-
C131R085	signal recognition particle receptor subunit beta	1.8457	1.83846	50	2.8e-174	0.8436	16	C:endosome; C:endoplasmic reticulum membrane; C:cytoplasmic microtubule; C:integral component of membrane; C:cytoplasmic membrane-bounded vesicle; C:extracellular region part; C:basal part of cell; C:plasma membrane region; F:GTP binding; F:ubiquitin protein ligase binding; P:MAPK cascade; P:small GTPase mediated signal transduction; P:positive regulation of macromolecule metabolic process; P:pos…	-
C115R150	er degradation-enhancing alpha-mannosidase-like protein 3 isoform x2	1.84485	2.0216	50	4.9e-75	0.6888	3	F:mannosyl-oligosaccharide mannosidase activity; F:alpha-glucosidase activity; P:metabolic process	-
C147R170	e3 ubiquitin-protein ligase topors	1.84463	1.81483	2	8.1e-13	0.62	-	-	-
C023R060	e3 sumo-protein ligase 2	1.84442	1.74674	50	8e-93	0.9138	31	C:mitochondrion; C:cytosol; C:nuclear membrane; C:nuclear inclusion body; C:nuclear pore cytoplasmic filaments; C:nuclear pore nuclear basket; F:RNA binding; F:peptidyl-prolyl cis-trans isomerase activity; F:zinc ion binding; F:Ran GTPase binding; F:ligase activity; F:protein complex binding; P:mitotic prophase; P:mitotic anaphase; P:mitotic prometaphase; P:protein peptidyl-prolyl isomerization; …	-
C246R045	stomatin-like protein mitochondrial	1.84399	1.92385	50	0	0.91	22	C:immunological synapse; C:mitochondrial inner membrane; C:mitochondrial intermembrane space; C:COP9 signalosome; C:actin cytoskeleton; C:extrinsic component of plasma membrane; C:T cell receptor complex; C:membrane raft; F:cardiolipin binding; P:mitochondrial calcium ion transport; P:cellular calcium ion homeostasis; P:lipid localization; P:positive regulation of mitochondrial membrane potential…	-
C128R132	alpha- -mannosyl-glycoprotein 4-beta-n-acetylglucosaminyltransferase a	1.84335	1.98389	50	0	0.9244	6	C:Golgi membrane; C:integral component of membrane; C:extracellular exosome; F:alpha-1,3-mannosylglycoprotein 4-beta-N-acetylglucosaminyltransferase activity; F:metal ion binding; P:protein N-linked glycosylation	-
C162R170	dihydropyrimidinase-related protein 2	1.84208	1.65577	50	1.5e-132	0.9672	12	C:mitochondrial envelope; C:cytosol; C:integral component of membrane; F:microtubule binding; F:hydrolase activity, acting on carbon-nitrogen (but not peptide) bonds; P:cytoskeleton organization; P:axon guidance; P:brain development; P:metabolic process; P:regulation of axon extension; P:axon regeneration; P:positive regulation of apoptotic process	-
C181R152	ubiquitin-conjugating enzyme e2 d4	1.84059	1.98298	50	1.6e-96	0.9878	14	F:ATP binding; F:ligase activity; F:mitogen-activated protein kinase kinase kinase binding; F:ubiquitin binding; F:ubiquitin conjugating enzyme activity; P:ubiquitin-dependent protein catabolic process; P:positive regulation of protein ubiquitination; P:protein K29-linked ubiquitination; P:pronephric nephron tubule development; P:protein K27-linked ubiquitination; P:protein K63-linked ubiquitinat…	-
C214R129	tom1-like protein 2 isoform x1	1.83931	2.00602	50	5.4e-18	0.8138	7	C:intracellular; C:extracellular exosome; F:protein kinase binding; F:clathrin binding; P:intracellular protein transport; P:signal transduction; P:negative regulation of mitotic nuclear division	-
C166R143	magnesium transporter mrs2 mitochondrial	1.8391	1.96405	50	1.5e-47	0.8112	4	C:mitochondrial inner membrane; F:magnesium ion transmembrane transporter activity; P:mitochondrial magnesium ion transport; P:cation transmembrane transport	-
C069R051	g-protein coupled receptor 4	1.83804	2.03967	50	9.1e-157	0.6108	3	C:integral component of membrane; F:G-protein coupled receptor activity; P:G-protein coupled receptor signaling pathway	-
C073R156	---NA---	1.83783	1.95929	0	-	-	-	-	-
C009R047	ubiquitin carboxyl-terminal hydrolase cyld-like	1.83761	1.93813	50	0	0.7738	7	C:microtubule cytoskeleton; C:cytoskeletal part; F:binding; F:ubiquitinyl hydrolase activity; P:ubiquitin-dependent protein catabolic process; P:regulation of signal transduction; P:negative regulation of cellular process	-
C075R069	helicase with zinc finger domain 2 isoform x1	1.8374	1.97019	50	2.8e-69	0.7584	2	F:ATP binding; F:metal ion binding	-
C252R057	haus augmin-like complex subunit 1	1.83634	1.72369	50	7.2e-153	0.7642	3	C:HAUS complex; P:spindle assembly; P:centrosome organization	-
C132R094	camp-responsive element modulator isoform x3	1.8357	1.73748	50	2.4e-156	0.767	18	C:nucleus; C:transcription factor complex; C:cytoplasm; F:core promoter sequence-specific DNA binding; F:transcription factor activity, sequence-specific DNA binding; F:cAMP response element binding protein binding; P:glucose metabolic process; P:fatty acid metabolic process; P:glycosphingolipid metabolic process; P:spermatogenesis; P:cAMP-mediated signaling; P:circadian regulation of gene expres…	-
C119R004	poly [ADP-ribose] polymerase 14	1.83528	1.52028	50	3.7e-83	0.7784	4	F:nucleotide binding; F:nucleic acid binding; F:NAD+ ADP-ribosyltransferase activity; P:metabolic process	-
C120R033	serine threonine-protein kinase endoribonuclease ire1	1.8338	1.77933	50	1.5e-75	0.6386	26	C:integral component of endoplasmic reticulum membrane; C:IRE1-TRAF2-ASK1 complex; C:IRE1-RACK1-PP2A complex; F:magnesium ion binding; F:endoribonuclease activity; F:protein serine/threonine kinase activity; F:ATP binding; F:enzyme binding; F:Hsp70 protein binding; F:protein homodimerization activity; F:ADP binding; F:Hsp90 protein binding; P:endothelial cell proliferation; P:mRNA catabolic proce…	-
C055R102	caspase-8-like	1.83253	1.65653	50	0	0.6252	10	C:cytoplasm; C:intracellular organelle; C:protein complex; F:cysteine-type endopeptidase activity; F:protein binding; P:induction by virus of host apoptotic process; P:regulation of cysteine-type endopeptidase activity involved in apoptotic process; P:positive regulation of proteolysis; P:system development; P:extrinsic apoptotic signaling pathway	-
C059R148	slam family member 8	1.83041	1.44777	50	0	0.6188	3	C:integral component of membrane; F:receptor activity; F:protein binding	-
C153R003	serine threonine-protein kinase endoribonuclease ire1	1.82809	1.78613	50	1.4e-141	0.793	28	C:nuclear inner membrane; C:mitochondrion; C:integral component of endoplasmic reticulum membrane; C:AIP1-IRE1 complex; C:IRE1-TRAF2-ASK1 complex; C:IRE1-RACK1-PP2A complex; F:magnesium ion binding; F:endoribonuclease activity; F:protein serine/threonine kinase activity; F:ATP binding; F:enzyme binding; F:Hsp70 protein binding; F:protein homodimerization activity; F:ADP binding; F:Hsp90 protein b…	-
C041R120	signal transducer and activator of transcription 1-alpha beta isoform x1	1.82661	1.69702	50	0	0.8538	23	C:nuclear chromatin; C:nucleoplasm; C:nucleolus; C:cytoplasm; F:RNA polymerase II core promoter proximal region sequence-specific DNA binding; F:RNA polymerase II core promoter sequence-specific DNA binding; F:transcription factor activity, RNA polymerase II core promoter sequence-specific; F:signal transducer activity; F:tumor necrosis factor receptor binding; F:enzyme binding; F:protein homodim…	-
C010R112	ump-cmp kinase mitochondrial	1.8264	2.1662	50	0	0.713	9	C:cytosol; C:intracellular membrane-bounded organelle; F:thymidylate kinase activity; F:uridylate kinase activity; P:dUDP biosynthetic process; P:dTDP biosynthetic process; P:dTTP biosynthetic process; P:nucleotide phosphorylation; P:cellular response to lipopolysaccharide	-
C202R161	b9 domain-containing protein 2	1.82534	1.7701	50	1e-121	0.9122	10	C:cytoplasm; C:centrosome; C:membrane; C:TCTN-B9D complex; C:ciliary basal body; F:gamma-tubulin binding; P:establishment of planar polarity; P:establishment or maintenance of cell polarity; P:opsin transport; P:cilium assembly	-
C248R112	ubiquitin-conjugating enzyme e2 d3 isoform x1	1.82471	1.80792	50	6e-99	0.988	50	C:euchromatin; C:sex chromatin; C:cytosol; C:plasma membrane; C:endosome membrane; C:nuclear body; C:PRC1 complex; C:extracellular exosome; C:MLL1 complex; F:chromatin binding; F:ubiquitin-specific protease activity; F:ATP binding; F:zinc ion binding; F:ligase activity; F:NEDD8-specific protease activity; F:ubiquitin protein ligase binding; F:ubiquitin binding; F:ubiquitin protein ligase activity…	-
C118R053	dnaj homolog subfamily a member 2	1.8245	2.14058	50	0	0.8992	9	C:cytosol; C:extracellular exosome; F:ATP binding; F:heat shock protein binding; F:metal ion binding; F:unfolded protein binding; F:chaperone binding; P:response to heat; P:protein refolding	-
C186R055	transmembrane protein 41a-b-like	1.82366	1.79398	50	8.4e-133	0.8316	1	C:integral component of membrane	-
C033R032	apoptosis regulator bax	1.82366	1.47002	50	1.2e-116	0.8148	34	C:mitochondrial outer membrane; C:endomembrane system; C:protein complex; C:membrane part; F:channel activity; F:protein homodimerization activity; F:protein heterodimerization activity; P:eye development; P:leukocyte homeostasis; P:release of cytochrome c from mitochondria; P:activation of cysteine-type endopeptidase activity involved in apoptotic process; P:gamete generation; P:nervous system d…	-
C133R012	cat eye syndrome critical region protein 5 homolog	1.82323	1.4624	50	0	0.804	1	C:cellular_component	-
C079R116	xk-related protein 8-like	1.82218	1.84911	50	6.8e-73	0.5446	1	C:integral component of membrane	-
C166R039	dual adapter for phosphotyrosine and 3-phosphotyrosine and 3-phosphoinositide	1.8205	1.69564	50	1.9e-177	0.8844	6	C:plasma membrane; C:phosphatidylinositol 3-kinase complex; F:phosphatidylinositol-3,4,5-trisphosphate binding; F:phosphatidylinositol 3-kinase regulator activity; F:phosphatidylinositol-3,4-bisphosphate binding; P:regulation of phosphatidylinositol 3-kinase activity	-
C228R008	ubiquitin-conjugating enzyme e2 l3	1.81924	-	50	2.1e-86	0.9674	19	C:ubiquitin ligase complex; C:nucleus; C:cytoplasm; C:extracellular exosome; F:transcription coactivator activity; F:ATP binding; F:ligase activity; F:ubiquitin protein ligase binding; F:poly(A) RNA binding; F:ubiquitin conjugating enzyme activity; F:ubiquitin-protein transferase activator activity; P:regulation of transcription, DNA-templated; P:cell proliferation; P:protein ubiquitination invol…	-
C152R064	pleckstrin homology domain-containing family f member 1	1.81861	1.56193	50	0	0.7104	3	F:metal ion binding; F:phosphatidylinositol phosphate binding; P:cellular component organization	-
C149R014	run and fyve domain-containing protein 2 isoform x2	1.81777	1.54114	50	4.9e-16	0.976	1	F:metal ion binding	-
C210R096	peptidoglycan-binding protein	1.81756	2.09169	50	4.8e-22	0.5002	1	F:binding	-
C035R055	repressor of rna polymerase iii transcription maf1 homolog	1.81735	1.51257	50	8.8e-167	0.914	10	C:nucleoplasm; C:nucleolus; C:cytoplasm; C:centrosome; F:RNA polymerase III core binding; F:RNA polymerase III type 1 promoter DNA binding; F:RNA polymerase III type 2 promoter DNA binding; F:RNA polymerase III type 3 promoter DNA binding; P:negative regulation of transcription from RNA polymerase III promoter; P:transcription factor TFIIIB complex assembly	-
C085R091	40s ribosomal protein partial	1.81546	1.80125	50	6.1e-115	0.9698	21	C:nucleoplasm; C:nucleolus; C:focal adhesion; C:membrane; C:cytosolic small ribosomal subunit; C:extracellular exosome; F:mRNA binding; F:structural constituent of ribosome; F:fibroblast growth factor binding; F:enzyme binding; F:protein complex binding; P:ribosomal small subunit assembly; P:nuclear-transcribed mRNA catabolic process, nonsense-mediated decay; P:formation of translation preinitiat…	-
C224R143	rna-directed dna polymerase from mobile element jockey-like	1.81525	2.26106	50	5.5e-55	0.5942	2	F:hydrolase activity; P:metabolic process	-
C041R105	caspase-8-like	1.8142	1.93165	29	3.6e-13	0.5952	3	F:cysteine-type peptidase activity; P:apoptotic process; P:regulation of cellular process	-
C122R168	---NA---	1.81399	1.75646	0	-	-	-	-	-
C118R043	protein ssuh2 homolog isoform x1	1.81357	1.93009	50	0	0.8064	2	F:heat shock protein binding; F:unfolded protein binding	-
C236R151	---NA---	1.81294	1.77379	0	-	-	-	-	-
C164R023	serine threonine-protein kinase rio3	1.81085	1.74816	50	0	0.873	3	F:protein serine/threonine kinase activity; F:ATP binding; P:protein phosphorylation	-
C064R122	40s ribosomal protein partial	1.81064	2.04604	50	6.1e-115	0.9698	21	C:nucleoplasm; C:nucleolus; C:focal adhesion; C:membrane; C:cytosolic small ribosomal subunit; C:extracellular exosome; F:mRNA binding; F:structural constituent of ribosome; F:fibroblast growth factor binding; F:enzyme binding; F:protein complex binding; P:ribosomal small subunit assembly; P:nuclear-transcribed mRNA catabolic process, nonsense-mediated decay; P:formation of translation preinitiat…	-
C094R072	fish virus induced trim protein	1.81064	1.73227	50	1.3e-167	0.8154	3	C:intracellular; F:protein binding; F:zinc ion binding	-
C060R057	mitogen-activated protein kinase kinase kinase 14-like	1.81022	1.66113	50	0	0.7042	11	C:cytoplasm; F:protein serine/threonine kinase activity; F:protein binding; F:ATP binding; P:positive regulation of immune system process; P:protein phosphorylation; P:response to stress; P:immune response; P:cell surface receptor signaling pathway; P:positive regulation of I-kappaB kinase/NF-kappaB signaling; P:cellular response to mechanical stimulus	-
C260R026	immediate early response gene 5 protein	1.8098	1.94711	19	1.6e-55	0.7053	3	F:molecular_function; P:biological_process; C:cellular_component	-
C144R009	e3 ubiquitin-protein ligase trim21-like	1.80939	2.10672	50	8.6e-96	0.7324	4	C:intracellular; F:catalytic activity; F:protein binding; F:zinc ion binding	-
C076R102	cyclin-g2	1.80918	2.13959	50	8.7e-159	0.8228	1	P:regulation of cell cycle	-
C128R115	chromodomain-helicase-dna-binding protein 4-like isoform x2	1.80897	1.84527	6	6.8e-13	0.95	9	C:NuRD complex; F:DNA binding; F:ATP binding; F:microtubule binding; F:ATP-dependent helicase activity; F:zinc ion binding; P:chromatin organization; P:regulation of transcription, DNA-templated; P:spindle assembly	-
C126R011	fish virus induced trim protein	1.80834	1.62939	50	6.2e-97	0.7488	2	F:protein binding; F:metal ion binding	-
C039R017	#NAME?	1.80813	1.5679	50	0	0.7316	5	C:nucleus; F:sequence-specific DNA binding; P:sprouting angiogenesis; P:regulation of transcription, DNA-templated; P:cell differentiation in spinal cord	-
C237R061	an1-type zinc finger protein 5	1.80792	1.54739	50	1e-121	0.8146	12	C:cytoplasm; F:DNA binding; F:protein binding; F:zinc ion binding; P:in utero embryonic development; P:vasculature development; P:respiratory system process; P:fibroblast migration; P:platelet-derived growth factor receptor signaling pathway; P:skeletal system morphogenesis; P:smooth muscle tissue development; P:face development	-
C096R160	leucine-zipper-like transcriptional regulator 1	1.80771	1.52028	50	0	0.9188	1	F:protein binding	-
C246R050	adp-ribosylation factor 6	1.80667	1.67191	50	1e-116	0.9956	46	C:protein phosphatase type 2A complex; C:ruffle; C:early endosome; C:Golgi apparatus; C:cytosol; C:focal adhesion; C:cell cortex; C:endocytic vesicle; C:midbody; C:filopodium membrane; C:cleavage furrow; C:chromaffin granule membrane; C:myelin sheath; C:recycling endosome membrane; C:extracellular exosome; F:GTPase activity; F:GTP binding; F:protein phosphatase type 2A regulator activity; F:G-pro…	-
C168R087	lethal malignant brain tumor-like protein 2	1.80604	2.1433	50	3.6e-47	0.6912	4	C:nucleus; F:nucleic acid binding; F:zinc ion binding; P:regulation of transcription, DNA-templated	-
C141R136	serine threonine-protein kinase vrk2 isoform x1	1.80604	1.83825	50	0	0.7998	10	C:endoplasmic reticulum; C:organelle membrane; C:intracellular organelle part; F:protein serine/threonine kinase activity; F:ATP binding; P:endocytosis; P:regulation of cell shape; P:regulation of signal transduction; P:Wnt signaling pathway; P:peptidyl-serine phosphorylation	-
C194R128	p53 apoptosis effector related to pmp-22	1.80521	1.72648	50	6.1e-78	0.787	5	C:bicellular tight junction; C:integral component of membrane; F:structural molecule activity; P:response to UV; P:regulation of apoptotic process	-
C239R031	---NA---	1.805	1.78242	0	-	-	-	-	-
C102R006	cklf-like marvel transmembrane domain-containing protein 7	1.80438	1.8719	50	1.6e-93	0.7954	4	C:integral component of membrane; F:protein kinase activity; F:ATP binding; P:protein phosphorylation	-
C065R116	probable atp-dependent rna helicase ddx17 isoform x2	1.80438	1.76092	50	1.7e-109	0.9162	15	C:nucleoplasm; C:nucleolus; C:membrane; F:transcription coactivator activity; F:ATP-dependent RNA helicase activity; F:ATP binding; F:estrogen receptor binding; F:poly(A) RNA binding; P:RNA processing; P:post-embryonic development; P:RNA secondary structure unwinding; P:positive regulation of intracellular estrogen receptor signaling pathway; P:positive regulation of transcription from RNA polyme…	-
C203R121	microfibrillar-associated protein 1	1.80375	1.43478	50	8.2e-55	0.9062	4	C:microfibril; F:protein binding; F:poly(A) RNA binding; P:extracellular matrix organization	-
C136R006	pleckstrin	1.8035	-	50	0	0.881	24	C:cytoplasm; C:ruffle membrane; F:protein kinase C binding; F:protein homodimerization activity; F:phosphatidylinositol-3,4-bisphosphate binding; P:hematopoietic progenitor cell differentiation; P:vesicle docking involved in exocytosis; P:integrin-mediated signaling pathway; P:positive regulation of platelet activation; P:negative regulation of inositol phosphate biosynthetic process; P:positive …	-
C169R103	tumor necrosis factor receptor superfamily member 5-like isoform x1	1.80333	1.57735	50	1.5e-159	0.6096	5	C:external side of plasma membrane; F:transmembrane signaling receptor activity; F:CD154 receptor binding; P:apoptotic process; P:TRIF-dependent toll-like receptor signaling pathway	-
C019R168	---NA---	1.80292	2.09024	0	-	-	-	-	-
C247R068	e3 ubiquitin-protein ligase trim21-like	1.80292	1.91986	50	1.1e-153	0.6714	3	C:intracellular; F:protein binding; F:zinc ion binding	-
C028R101	---NA---	1.80271	1.77276	0	-	-	-	-	-
C035R053	---NA---	1.8025	-	0	-	-	-	-	-
C002R062	immediate early response gene 5 protein	1.80208	1.81567	50	9.4e-116	0.667	3	F:molecular_function; P:biological_process; C:cellular_component	-
C168R159	interferon regulatory factor 1	1.80063	1.6131	50	1.2e-83	0.8738	19	C:nuclear chromatin; C:cytoplasm; F:RNA polymerase II core promoter proximal region sequence-specific DNA binding; F:transcriptional activator activity, RNA polymerase II core promoter proximal region sequence-specific binding; P:apoptotic process; P:cell cycle arrest; P:positive regulation of interferon-beta production; P:regulation of MyD88-dependent toll-like receptor signaling pathway; P:cell…	-
C190R143	---NA---	1.80021	1.95206	0	-	-	-	-	-
C028R157	PREDICTED: uncharacterized protein LOC103034285	1.79938	1.97064	4	1.1e-12	0.59	-	-	-
C118R157	protein nlrc3-like	1.79855	1.37745	50	3.6e-147	0.8372	1	F:ATP binding	-
C104R143	apoptosis regulator bax-like	1.79834	1.86887	50	5e-99	0.725	49	C:nuclear envelope; C:mitochondrial outer membrane; C:mitochondrial permeability transition pore complex; C:endoplasmic reticulum membrane; C:cytosol; C:extracellular exosome; C:BAX complex; F:lipid binding; F:channel activity; F:protein homodimerization activity; F:protein heterodimerization activity; F:BH3 domain binding; P:regulation of protein phosphorylation; P:transformed cell apoptotic pro…	-
C038R124	interferon regulatory factor 8	1.79772	1.60659	50	8.2e-143	0.7864	13	C:nucleoplasm; F:regulatory region DNA binding; F:transcription factor activity, sequence-specific DNA binding; P:regulation of myeloid leukocyte differentiation; P:phagocytosis; P:immune response; P:positive regulation of interferon-gamma production; P:positive regulation of interleukin-12 production; P:defense response to bacterium; P:defense response to protozoan; P:negative regulation of grow…	-
C248R150	cd209 antigen-like protein e	1.79668	1.98252	50	6e-21	0.6098	1	F:carbohydrate binding	-
C040R118	---NA---	1.79647	2.27968	0	-	-	-	-	-
C161R168	---NA---	1.79585	2.25636	0	-	-	-	-	-
C154R109	dual adapter for phosphotyrosine and 3-phosphotyrosine and 3-phosphoinositide	1.79543	1.91764	50	1.9e-177	0.8844	6	C:plasma membrane; C:phosphatidylinositol 3-kinase complex; F:phosphatidylinositol-3,4,5-trisphosphate binding; F:phosphatidylinositol 3-kinase regulator activity; F:phosphatidylinositol-3,4-bisphosphate binding; P:regulation of phosphatidylinositol 3-kinase activity	-
C131R039	zinc finger fyve domain-containing protein 1 isoform x2	1.7944	1.87688	50	1.1e-65	0.8744	15	C:pre-autophagosomal structure; C:autophagosome; C:endoplasmic reticulum; C:Golgi stack; C:ER-mitochondrion membrane contact site; C:perinuclear region of cytoplasm; C:extrinsic component of omegasome membrane; F:GTPase activity; F:protein binding; F:GTP binding; F:1-phosphatidylinositol binding; F:phosphatidylinositol-3,4,5-trisphosphate binding; F:zinc ion binding; F:phosphatidylinositol-3,4-bi…	-
C054R041	skin secretory protein xp2-like	1.7944	1.58703	46	8.2e-19	0.4896	-	-	-
C214R004	mitogen-activated protein kinase 12	1.79419	1.71912	50	8.9e-91	0.8676	5	C:cytoplasm; F:MAP kinase activity; F:ATP binding; P:MAPK cascade; P:regulation of transcription, DNA-templated	-
C197R009	cytochrome p450 2g1-like	1.79378	1.5641	50	1.4e-102	0.867	12	C:cytoplasm; C:intracellular membrane-bounded organelle; F:iron ion binding; F:arachidonic acid epoxygenase activity; F:steroid hydroxylase activity; F:oxidoreductase activity, acting on paired donors, with incorporation or reduction of molecular oxygen, reduced flavin or flavoprotein as one donor, and incorporation of one atom of oxygen; F:oxygen binding; F:heme binding; P:xenobiotic metabolic p…	-
C259R141	40s ribosomal protein partial	1.79108	2.0432	50	6.1e-115	0.9698	21	C:nucleoplasm; C:nucleolus; C:focal adhesion; C:membrane; C:cytosolic small ribosomal subunit; C:extracellular exosome; F:mRNA binding; F:structural constituent of ribosome; F:fibroblast growth factor binding; F:enzyme binding; F:protein complex binding; P:ribosomal small subunit assembly; P:nuclear-transcribed mRNA catabolic process, nonsense-mediated decay; P:formation of translation preinitiat…	-
C039R128	inactive phospholipase c-like protein 2	1.79067	1.88862	50	4.1e-96	0.8168	9	C:intracellular; F:phosphatidylinositol phospholipase C activity; F:signal transducer activity; F:GABA receptor binding; P:regulation of cell communication; P:lipid catabolic process; P:regulation of signaling; P:intracellular signal transduction; P:B cell activation	-
C105R163	gig2-like protein	1.79067	1.7031	50	1.5e-136	0.638	2	F:NAD+ ADP-ribosyltransferase activity; P:metabolic process	-
C134R116	vascular cell adhesion protein 1-like	1.79005	2.08349	50	1.8e-113	0.5588	1	F:protein binding	-
C015R115	ubiquitin-protein ligase e3c	1.78922	1.62864	50	1.2e-24	0.9752	5	C:cytoplasm; F:ubiquitin-protein transferase activity; F:ligase activity; P:protein polyubiquitination; P:protein ubiquitination involved in ubiquitin-dependent protein catabolic process	-
C005R031	ribonuclease p protein subunit p25-like protein	1.78922	1.43644	50	5.4e-140	0.6894	1	F:nucleic acid binding	-
C193R063	stress response protein nst1-like	1.78902	1.42175	35	8.4e-25	0.5337	-	-	-
C004R040	double-stranded rna-binding protein staufen homolog 1 isoform x1	1.78881	1.99931	50	0	0.866	2	F:RNA binding; P:germ cell development	-
C106R030	katanin p60 atpase-containing subunit a1	1.78881	1.6851	50	0	0.8698	24	C:spindle pole; C:nucleoplasm; C:cytoplasm; C:lipid particle; C:centrosome; C:microtubule; C:plasma membrane; C:axon; C:midbody; F:ATP binding; F:microtubule binding; F:microtubule-severing ATPase activity; F:dynein binding; F:protein heterodimerization activity; P:microtubule bundle formation; P:neuron migration; P:mitotic nuclear division; P:spermatogenesis; P:protein localization; P:metabolic …	-
C148R145	---NA---	1.7886	1.89015	0	-	-	-	-	-
C182R169	---NA---	1.78798	2.07796	0	-	-	-	-	-
C108R144	endophilin- partial	1.7853	1.48161	50	4.8e-176	0.7106	8	C:membrane; C:intracellular membrane-bounded organelle; C:cytoplasmic part; P:cellular metabolic process; P:primary metabolic process; P:single-organism cellular process; P:positive regulation of cellular process; P:organic substance metabolic process	-
C047R122	scavenger receptor class f member 2	1.78386	2.04202	50	3.1e-63	0.6068	4	P:heterophilic cell-cell adhesion via plasma membrane cell adhesion molecules; F:scavenger receptor activity; C:focal adhesion; P:receptor-mediated endocytosis	-
C243R161	ataxin-2 isoform x5	1.78386	1.61254	50	3.7e-45	0.914	4	C:cytoplasmic stress granule; F:poly(A) RNA binding; P:regulation of cytoplasmic mRNA processing body assembly; P:stress granule assembly	-
C213R165	rho-related gtp-binding protein isoform x1	1.78365	1.78097	50	1.7e-150	0.8738	11	C:cytoplasm; C:cytoskeleton; C:plasma membrane; C:extracellular exosome; F:GTPase activity; F:GTP binding; P:intracellular protein transport; P:nucleocytoplasmic transport; P:actin filament organization; P:small GTPase mediated signal transduction; P:metabolic process	-
C004R140	nuclear factor nf-kappa-b p100 subunit isoform x1	1.7818	1.87017	50	0	0.8118	14	C:nucleoplasm; C:cytosol; C:I-kappaB/NF-kappaB complex; F:RNA polymerase II regulatory region sequence-specific DNA binding; F:RNA polymerase II transcription factor activity, sequence-specific DNA binding; F:chromatin binding; F:protein binding; P:negative regulation of transcription from RNA polymerase II promoter; P:inflammatory response; P:I-kappaB kinase/NF-kappaB signaling; P:response to cy…	-
C050R007	antigen peptide transporter 2-like	1.78036	1.55025	50	0	0.8188	14	C:lysosomal membrane; C:TAP complex; F:ATP binding; F:peptide-transporting ATPase activity; F:MHC protein binding; P:antigen processing and presentation of exogenous protein antigen via MHC class Ib, TAP-dependent; P:antigen processing and presentation of endogenous peptide antigen via MHC class I via ER pathway, TAP-dependent; P:antigen processing and presentation of endogenous peptide antigen v…	-
C103R159	adenosine receptor a2a-like	1.77995	1.46206	50	1.7e-152	0.8214	19	C:integral component of plasma membrane; F:G-protein coupled adenosine receptor activity; F:enzyme binding; F:identical protein binding; P:adenosine receptor signaling pathway; P:phagocytosis; P:apoptotic process; P:inflammatory response; P:cellular defense response; P:activation of adenylate cyclase activity; P:cell-cell signaling; P:central nervous system development; P:blood coagulation; P:sen…	-
C212R124	---NA---	1.77974	1.67694	0	-	-	-	-	-
C082R014	---NA---	1.77953	1.6849	0	-	-	-	-	-
C231R104	---NA---	1.77933	1.79647	0	-	-	-	-	-
C145R119	nesprin-1 isoform x7	1.7785	-	14	1.3e-39	0.5836	3	P:regulation of apoptotic process; P:biological_process; C:cellular_component	-
C265R087	tumor necrosis factor receptor superfamily member 5-like isoform x2	1.77707	1.74473	50	1.4e-166	0.6114	5	C:external side of plasma membrane; F:transmembrane signaling receptor activity; F:CD154 receptor binding; P:apoptotic process; P:TRIF-dependent toll-like receptor signaling pathway	-
C131R044	microtubule-associated proteins 1a 1b light chain 3b	1.77707	1.63826	50	6.3e-74	0.9708	16	C:pre-autophagosomal structure; C:autophagosome membrane; C:mitochondrion; C:cytosol; C:microtubule; C:axoneme; C:endomembrane system; C:extrinsic component of membrane; C:cytoplasmic vesicle; F:microtubule binding; F:ubiquitin protein ligase binding; P:autophagosome assembly; P:cellular response to nitrogen starvation; P:nucleophagy; P:membrane fusion; P:regulation of mitophagy	-
C034R092	t-cell immunomodulatory protein	1.77645	-	50	2.6e-49	0.9706	3	C:plasma membrane; C:integral component of membrane; C:extracellular exosome	-
C229R098	biorientation of chromosomes in cell division protein 1	1.77604	1.88797	50	2.3e-105	0.8694	7	C:kinetochore; C:extracellular region; C:cytoplasm; C:cytoskeleton; F:hormone activity; P:mitotic nuclear division; P:cell division	-
C145R145	canalicular multispecific organic anion transporter 1	1.77584	1.89715	50	5e-167	0.8622	9	C:cell surface; C:integral component of membrane; C:apical plasma membrane; F:ATP binding; F:ATPase activity, coupled to transmembrane movement of substances; F:xenobiotic transporter activity; P:metabolic process; P:xenobiotic transport; P:transmembrane transport	-
C233R104	nuclear factor nf-kappa-b p100 subunit isoform x1	1.77563	1.68997	50	8.4e-142	0.8664	13	C:nucleoplasm; C:cytosol; C:I-kappaB/NF-kappaB complex; F:RNA polymerase II regulatory region sequence-specific DNA binding; F:RNA polymerase II transcription factor activity, sequence-specific DNA binding; F:chromatin binding; P:negative regulation of transcription from RNA polymerase II promoter; P:inflammatory response; P:I-kappaB kinase/NF-kappaB signaling; P:response to cytokine; P:NIK/NF-ka…	-
C165R010	poly [ADP-ribose] polymerase 14	1.77481	1.53741	50	0	0.6744	2	F:NAD+ ADP-ribosyltransferase activity; P:metabolic process	-
C120R099	epithelial-stromal interaction protein 1	1.77399	1.63448	50	1.8e-172	0.6294	1	F:protein binding	-
C191R116	trna selenocysteine 1-associated protein 1- partial	1.77133	1.90836	50	2.7e-22	0.9366	4	C:nucleus; F:nucleotide binding; F:poly(A) RNA binding; P:selenocysteine incorporation	-
C256R051	mucosa-associated lymphoid tissue lymphoma translocation protein 1-like	1.77133	-	50	0	0.7826	2	F:cysteine-type endopeptidase activity; P:proteolysis	-
C030R011	atp-binding cassette sub-family d member 3	1.76765	1.7998	50	2.3e-74	0.9814	18	C:mitochondrial inner membrane; C:peroxisomal membrane; C:peroxisomal matrix; C:cytosol; C:integral component of membrane; F:long-chain fatty acid transporter activity; F:ATP binding; F:ATPase activity, coupled to transmembrane movement of substances; F:protein homodimerization activity; F:protein self-association; P:fatty acid biosynthetic process; P:fatty acid beta-oxidation; P:peroxisome organ…	-
C053R152	thymidine phosphorylase	1.76765	1.77584	50	0	0.7728	5	F:phosphorylase activity; F:thymidine phosphorylase activity; F:pyrimidine-nucleoside phosphorylase activity; P:pyrimidine nucleobase metabolic process; P:pyrimidine nucleoside metabolic process	-
C035R042	transcription factor -like	1.76704	1.7411	24	3.2e-17	0.9204	6	C:nucleus; C:transcription factor complex; F:transcription factor activity, sequence-specific DNA binding; F:sequence-specific DNA binding; F:protein heterodimerization activity; P:positive regulation of transcription, DNA-templated	-
C103R056	unnamed protein product	1.76643	2.2522	20	5.9e-28	0.7625	10	C:intracellular; C:integral component of membrane; F:catalytic activity; F:GTPase activator activity; F:transporter activity; F:calcium ion binding; F:GTP binding; P:small GTPase mediated signal transduction; P:positive regulation of GTPase activity; P:single-organism transport	-
C073R121	coagulation factor xiii a chain	1.76479	1.62188	50	0	0.7968	3	F:protein-glutamine gamma-glutamyltransferase activity; F:metal ion binding; P:peptide cross-linking	-
C137R109	protein fam193b	1.76255	1.98298	50	1.1e-45	0.9186	3	C:nucleoplasm; C:nucleolus; C:cytoplasm	-
C227R112	chromodomain-helicase-dna-binding protein 4-like isoform x1	1.76194	1.8321	50	0	0.804	10	C:NuRD complex; F:DNA binding; F:ATP binding; F:microtubule binding; F:ATP-dependent helicase activity; F:zinc ion binding; P:chromatin organization; P:regulation of transcription, DNA-templated; P:fin regeneration; P:spindle assembly	-
C257R149	spermatogenesis-associated protein partial	1.76052	2.12677	50	0	0.5934	7	F:molecular_function; P:biological_process; C:cellular_component; P:motile cilium assembly; F:myosin light chain binding; C:sperm connecting piece; P:spermatogenesis	-
C192R046	multiple banded antigen	1.75991	-	32	2e-14	0.5463	3	P:peptide cross-linking; C:cytoplasm; F:carbohydrate binding	-
C018R047	secretion-regulating guanine nucleotide exchange factor	1.75666	1.95387	50	8.5e-104	0.7402	2	C:intracellular organelle; P:negative regulation of protein secretion	-
C116R148	protein	1.75605	1.61945	50	4.6e-35	0.5018	2	F:GTP binding; P:neuropeptide signaling pathway	-
C098R168	probable gpi-anchored adhesin-like protein pga55	1.75443	1.88775	50	0	0.62	3	F:nucleic acid binding; F:ligase activity; P:metabolic process	-
C081R158	fish virus induced trim protein	1.75443	1.47121	50	2.1e-167	0.7914	3	C:intracellular; F:protein binding; F:zinc ion binding	-
C247R063	e3 ubiquitin-protein ligase cbl-c isoform x1	1.75341	-	50	1.2e-107	0.8202	25	C:nucleoplasm; C:cytosol; C:flotillin complex; F:phosphotyrosine binding; F:transcription factor activity, sequence-specific DNA binding; F:signal transducer activity; F:calcium ion binding; F:zinc ion binding; F:ligase activity; F:SH3 domain binding; F:ephrin receptor binding; F:ubiquitin protein ligase activity; P:positive regulation of T cell anergy; P:regulation of transcription, DNA-template…	-
C078R111	t-box transcription factor tbx6	1.75321	1.72051	50	1.3e-82	0.7824	14	C:nucleus; C:transcriptional repressor complex; F:RNA polymerase II activating transcription factor binding; F:transcriptional repressor activity, RNA polymerase II transcription factor binding; F:DNA binding; F:transcription factor activity, sequence-specific DNA binding; P:negative regulation of transcription from RNA polymerase II promoter; P:mesoderm formation; P:muscle organ development; P:e…	-
C166R161	cysteine serine-rich nuclear protein 2	1.75281	-	50	2e-34	0.87	7	C:nucleus; F:transcriptional activator activity, RNA polymerase II transcription regulatory region sequence-specific binding; F:phosphatase binding; F:sequence-specific DNA binding; P:apoptotic process; P:negative regulation of phosphatase activity; P:positive regulation of transcription from RNA polymerase II promoter	-
C054R145	interferon regulatory factor 5	1.7526	1.67869	50	0	0.792	10	C:integral component of membrane; C:cell part; F:regulatory region DNA binding; F:transcription factor activity, sequence-specific DNA binding; F:G-protein coupled receptor activity; F:protein binding; P:regulation of transcription from RNA polymerase II promoter; P:G-protein coupled receptor signaling pathway; P:cytokine-mediated signaling pathway; P:defense response to virus	-
C062R009	---NA---	1.75139	1.41209	0	-	-	-	-	-
C078R042	heat shock 70 kda protein 4-like	1.74997	1.87449	50	0	0.9134	1	F:ATP binding	-
C177R077	optineurin (optn)	1.74977	1.53156	50	1.9e-111	0.6188	15	C:extracellular region; F:transferase activity; P:intracellular signal transduction; P:phosphorylation; F:protein serine/threonine kinase activity; F:receptor signaling protein activity; F:protein kinase activity; P:protein phosphorylation; F:nucleotide binding; F:ATP binding; F:kinase activity; P:signal transduction; C:intracellular; F:metal ion binding; C:nematocyst	-
C006R113	activator of 90 kda heat shock protein atpase homolog 1-like	1.74957	1.88165	50	0	0.8512	7	C:cytoplasm; C:extracellular exosome; F:ATPase activator activity; F:chaperone binding; P:response to stress; P:positive regulation of ATPase activity; P:embryonic neurocranium morphogenesis	-
C052R040	cytidine deaminase	1.74937	1.79108	50	1.2e-110	0.8024	33	C:mitochondrial outer membrane; C:macromolecular complex; C:cell projection; C:intracellular non-membrane-bounded organelle; F:nucleoside binding; F:cytidine deaminase activity; F:protein kinase activity; F:zinc ion binding; F:enzyme binding; F:identical protein binding; P:mitophagy; P:regulation of nucleotide metabolic process; P:protein phosphorylation; P:positive regulation of signal transduct…	-
C193R156	39s ribosomal protein mitochondrial	1.74836	1.91853	50	7.2e-144	0.8194	5	C:mitochondrial inner membrane; C:mitochondrial large ribosomal subunit; F:structural constituent of ribosome; F:poly(A) RNA binding; P:translation	-
C244R057	syntaxin-5 isoform x2	1.74735	1.80458	50	0	0.9116	16	C:Golgi membrane; C:nucleoplasm; C:integral component of membrane; C:SNARE complex; C:vesicle; F:SNARE binding; F:SNAP receptor activity; F:protein N-terminus binding; P:intracellular protein transport; P:ER to Golgi vesicle-mediated transport; P:vesicle fusion; P:early endosome to Golgi transport; P:positive regulation of protein catabolic process; P:vesicle docking; P:Golgi disassembly; P:regul…	-
C175R160	apolipoprotein m	1.74674	1.54132	28	3e-41	0.6957	-	-	-
C253R127	zinc finger swim domain-containing protein partial	1.74614	1.78468	50	1.2e-136	0.9638	3	F:zinc ion binding; P:neuron projection morphogenesis; P:regulation of neuron migration	-
C211R117	nucleotide-binding oligomerization domain-containing protein 2	1.74594	1.56989	50	5.4e-121	0.8432	3	F:ATP binding; P:defense response to bacterium; P:regulation of apoptotic process	-
C250R041	protein ssuh2 homolog isoform x1	1.74553	2.09483	50	0	0.8064	2	F:heat shock protein binding; F:unfolded protein binding	-
C033R156	lim domain-binding protein 1 isoform x5	1.74533	2.0746	50	7.9e-116	0.942	5	C:nucleus; F:transcription cofactor activity; F:LIM domain binding; F:protein dimerization activity; P:regulation of transcription from RNA polymerase II promoter	-
C256R066	protein transport protein sec61 subunit alpha-like 1	1.74533	1.62883	50	1.2e-22	0.9936	17	C:mitochondrion; C:rough endoplasmic reticulum; C:cytosol; C:integral component of endoplasmic reticulum membrane; F:cytochrome-c oxidase activity; F:protein binding; F:ribosome binding; P:antigen processing and presentation of exogenous peptide antigen via MHC class I, TAP-dependent; P:SRP-dependent cotranslational protein targeting to membrane; P:posttranslational protein targeting to membrane;…	-
C150R113	la-related protein 7	1.74493	1.48212	50	5.5e-126	0.8758	6	C:nucleoplasm; C:Golgi apparatus; C:ribonucleoprotein complex; F:nucleotide binding; F:poly(A) RNA binding; P:RNA processing	-
C113R146	rna-directed dna polymerase from mobile element jockey- partial	1.74311	2.25116	50	2e-78	0.5352	5	C:intracellular; F:guanyl-nucleotide exchange factor activity; P:small GTPase mediated signal transduction; P:actin cytoskeleton organization; P:positive regulation of GTPase activity	-
C245R141	---NA---	1.74291	1.85339	0	-	-	-	-	-
C192R069	nuclear receptor subfamily 1 group d member 1-like	1.7407	1.52908	50	2.6e-122	0.9256	9	C:nucleus; F:steroid hormone receptor activity; F:retinoic acid receptor activity; F:thyroid hormone receptor activity; F:zinc ion binding; F:sequence-specific DNA binding; P:regulation of transcription, DNA-templated; P:steroid hormone mediated signaling pathway; P:retinoic acid receptor signaling pathway	-
C143R122	ribonuclease h2 subunit a	1.73889	1.68218	50	0	0.8488	7	C:ribonuclease H2 complex; F:RNA binding; F:RNA-DNA hybrid ribonuclease activity; F:bidentate ribonuclease III activity; P:mismatch repair; P:DNA replication, removal of RNA primer; P:RNA phosphodiester bond hydrolysis, endonucleolytic	-
C009R147	helicase mov-10-	1.73869	1.64947	50	0	0.706	4	C:cytoplasmic mRNA processing body; F:nucleotide binding; F:helicase activity; P:mRNA cleavage involved in gene silencing by miRNA	-
C035R097	cd83 antigen	1.73789	2.13613	50	9.6e-145	0.7126	3	C:cell surface; P:T cell activation involved in immune response; P:dendritic cell antigen processing and presentation	-
C259R138	nedd4-like e3 ubiquitin-protein ligase wwp2 isoform x1	1.73728	1.73869	50	0	0.9366	26	C:nucleus; C:cytoplasm; C:membrane; C:extracellular exosome; F:transcriptional activator activity, RNA polymerase II transcription factor binding; F:transcription factor binding; F:UDP-N-acetylmuramoylalanyl-D-glutamyl-2,6-diaminopimelate-D-alanyl-D-alanine ligase activity; F:ribosomal S6-glutamic acid ligase activity; F:coenzyme F420-0 gamma-glutamyl ligase activity; F:coenzyme F420-2 alpha-glut…	-
C015R154	kynurenine 3-monooxygenase	1.73708	1.45717	50	0	0.8622	16	C:mitochondrial outer membrane; C:mitochondrial inner membrane; C:integral component of membrane; C:extracellular exosome; F:kynurenine 3-monooxygenase activity; F:NAD(P)H oxidase activity; F:FAD binding; P:response to yeast; P:tryptophan catabolic process; P:response to salt stress; P:quinolinate biosynthetic process; P:'de novo' NAD biosynthetic process from tryptophan; P:anthranilate metabolic…	-
C061R138	---NA---	1.73608	1.54774	0	-	-	-	-	-
C223R022	fibronectin-like	1.73608	-	50	4.9e-75	0.8378	13	C:interstitial matrix; F:integrin binding; P:somite specification; P:cell migration involved in sprouting angiogenesis; P:heart field specification; P:heart jogging; P:cardioblast migration to the midline involved in heart rudiment formation; P:single organismal cell-cell adhesion; P:adrenal gland development; P:establishment of epithelial cell apical/basal polarity; P:embryonic viscerocranium mo…	-
C080R164	transmembrane protein 50b	1.73528	1.55779	50	1.2e-16	0.8918	3	C:endoplasmic reticulum; C:plasma membrane; C:integral component of membrane	-
C008R012	golgi snap receptor complex member 2	1.73508	-	50	8.5e-134	0.9288	14	C:Golgi membrane; C:endoplasmic reticulum membrane; C:ER to Golgi transport vesicle membrane; C:integral component of membrane; C:SNARE complex; C:late endosome membrane; F:SNARE binding; F:SNAP receptor activity; P:protein targeting to vacuole; P:ER to Golgi vesicle-mediated transport; P:intra-Golgi vesicle-mediated transport; P:Golgi to vacuole transport; P:retrograde transport, endosome to Gol…	-
C264R057	dna damage-inducible transcript 4-like protein	1.73468	1.99561	50	2.6e-129	0.7208	2	C:troponin complex; P:negative regulation of signal transduction	-
C148R108	---NA---	1.73428	2.73461	0	-	-	-	-	-
C062R007	interferon-induced helicase c domain-containing protein 1	1.73408	1.63127	50	7.4e-178	0.6278	10	C:cytoplasm; F:DNA binding; F:double-stranded RNA binding; F:helicase activity; F:ATP binding; F:protein heterodimerization activity; P:regulation of transcription, DNA-templated; P:response to virus; P:innate immune response; P:immune response involved in response to exogenous dsRNA	-
C266R073	integrin beta-7	1.73347	1.65519	50	0	0.629	12	C:cell surface; C:integrin alpha4-beta7 complex; C:extracellular exosome; F:receptor activity; F:cell adhesion molecule binding; P:cell-matrix adhesion involved in ameboidal cell migration; P:integrin-mediated signaling pathway; P:heterotypic cell-cell adhesion; P:substrate adhesion-dependent cell spreading; P:receptor clustering; P:leukocyte tethering or rolling; P:T cell migration	-
C238R153	deoxycytidine kinase	1.73307	-	50	0	0.8868	18	C:nucleus; C:cytosol; F:magnesium ion binding; F:deoxycytidine kinase activity; F:ATP binding; F:drug binding; F:pyrimidine deoxyribonucleoside binding; F:protein homodimerization activity; P:purine nucleobase metabolic process; P:pyrimidine nucleobase metabolic process; P:pyrimidine nucleotide metabolic process; P:deoxyribonucleoside monophosphate biosynthetic process; P:nucleotide biosynthetic …	-
C253R134	class e basic helix-loop-helix protein 40	1.73287	2.59548	50	3e-57	0.684	13	C:cytoplasm; C:nuclear lumen; F:transcriptional repressor activity, RNA polymerase II core promoter proximal region sequence-specific binding; F:RNA polymerase II activating transcription factor binding; F:transcription factor activity, RNA polymerase II distal enhancer sequence-specific binding; F:transcription corepressor activity; F:MRF binding; F:protein heterodimerization activity; F:E-box b…	-
C186R029	H2.0-like homeobox protein isoform	1.73227	1.80625	50	0	0.7316	5	C:nucleus; F:sequence-specific DNA binding; P:sprouting angiogenesis; P:regulation of transcription, DNA-templated; P:cell differentiation in spinal cord	-
C151R003	tripartite motif-containing protein 16	1.73067	1.59071	50	1.4e-66	0.8308	4	C:intracellular; C:integral component of membrane; F:protein binding; F:zinc ion binding	-
C206R067	dynein intermediate chain axonemal	1.73047	1.45599	50	1.5e-112	0.8998	2	F:protein binding; P:epithelial cilium movement	-
C239R038	immunoglobulin-binding protein 1	1.73027	1.64509	50	0	0.7918	11	C:cytosol; F:protein phosphatase type 2A regulator activity; F:protein phosphatase 2A binding; P:negative regulation of transcription from RNA polymerase II promoter; P:positive regulation of cellular metabolic process; P:negative regulation of stress-activated MAPK cascade; P:regulation of protein phosphatase type 2A activity; P:response to tumor necrosis factor; P:negative regulation of cystein…	-
C072R153	zinc finger protein 638-like isoform x1	1.72947	1.69858	16	1.9e-20	0.6775	2	F:nucleotide binding; F:nucleic acid binding	-
C004R069	something about silencing protein partial	1.72887	1.79502	50	1.5e-11	0.9756	3	C:nucleolus; F:poly(A) RNA binding; P:brain development	-
C167R130	gamma-aminobutyric acid receptor-associated 1	1.72788	1.64091	50	1.3e-55	0.911	10	C:pre-autophagosomal structure; C:autophagosome membrane; C:cytosol; C:extrinsic component of membrane; F:microtubule binding; F:GABA receptor binding; P:autophagosome assembly; P:mitophagy; P:nucleophagy; P:membrane fusion	-
C080R161	tyrosine-protein kinase lyn-like	1.72748	1.64129	50	6e-108	0.9298	83	C:nucleus; C:mitochondrial intermembrane space; C:Golgi apparatus; C:cytosol; C:cell-cell adherens junction; C:postsynaptic density; C:mitochondrial crista; C:extrinsic component of cytoplasmic side of plasma membrane; C:integrin alpha2-beta1 complex; C:mast cell granule; C:membrane raft; C:perinuclear region of cytoplasm; C:extracellular exosome; F:non-membrane spanning protein tyrosine kinase a…	-
C056R080	---NA---	1.72668	1.51519	0	-	-	-	-	-
C081R037	---NA---	1.72628	1.75281	0	-	-	-	-	-
C047R032	pleckstrin homology domain-containing family a member partial	1.72608	1.99147	50	5.1e-66	0.8566	-	-	-
C098R061	peroxisomal biogenesis factor 3	1.72508	1.47853	50	1.5e-128	0.7996	15	C:nucleoplasm; C:integral component of peroxisomal membrane; C:endoplasmic reticulum; C:cytosol; C:integral component of plasma membrane; C:protein-lipid complex; C:protein complex; F:lipid binding; F:amino acid transmembrane transporter activity; F:protein dimerization activity; P:positive regulation of defense response to virus by host; P:amino acid transmembrane transport; P:peroxisome membran…	-
C075R140	ubiquitin-conjugating enzyme e2 j1	1.72469	-	4	1.1e-16	0.7925	-	-	-
C152R001	ras-related protein rab-39b-like	1.72429	1.60232	50	1.6e-154	0.8054	8	C:Golgi apparatus; C:membrane; F:GTPase activity; F:GTP binding; P:intracellular protein transport; P:nucleocytoplasmic transport; P:metabolic process; P:Rab protein signal transduction	-
C044R022	protein fem-1 homolog c	1.72389	1.75382	50	4.6e-96	0.9064	2	C:cytoplasm; P:protein ubiquitination	-
C008R149	interferon regulatory factor 1	1.72349	1.79502	28	2.6e-90	0.6568	5	C:nucleus; F:regulatory region DNA binding; F:transcription factor activity, sequence-specific DNA binding; P:regulation of transcription, DNA-templated; P:response to peptide hormone	-
C245R054	bag family molecular chaperone regulator 3	1.72269	1.80021	50	1.9e-121	0.719	4	C:cell part; F:chaperone binding; P:heart contraction; P:biological regulation	-
C158R118	rab-interacting lysosomal protein	1.7225	1.81043	50	0	0.7434	-	-	-
C091R045	phd finger protein 11	1.7221	1.49796	46	1.3e-124	0.6767	5	C:membrane; F:calcium ion binding; F:zinc ion binding; F:organic cyclic compound binding; F:heterocyclic compound binding	-
C153R113	protein nlrc3- partial	1.7215	1.88187	50	2e-69	0.764	1	F:nucleotide binding	-
C165R038	arpin	1.72071	1.805	50	4.3e-145	0.8224	8	C:lamellipodium; F:metallopeptidase activity; F:zinc ion binding; P:proteolysis; P:negative regulation of cell migration; P:directional locomotion; P:negative regulation of actin nucleation; P:negative regulation of lamellipodium morphogenesis	-
C111R027	---NA---	1.71951	2.0037	0	-	-	-	-	-
C019R116	---NA---	1.71852	1.89168	0	-	-	-	-	-
C098R104	c-myc-binding protein	1.71773	1.74937	50	1.7e-26	0.7994	3	F:transcription coactivator activity; P:regulation of transcription, DNA-templated; P:positive regulation of smoothened signaling pathway	-
C064R084	ubiquitin carboxyl-terminal hydrolase 4 isoform x1	1.71495	1.71119	50	0	0.8802	15	C:nucleus; C:cytoplasm; C:plasma membrane; F:cysteine-type endopeptidase activity; F:ubiquitin-specific protease activity; F:adenosine receptor binding; F:identical protein binding; F:metal ion binding; P:spliceosomal tri-snRNP complex assembly; P:protein deubiquitination; P:negative regulation of protein ubiquitination; P:regulation of protein stability; P:protein localization to cell surface; P…	-
C052R157	glutamate mitochondrial	1.71475	1.81211	50	0	0.9454	4	F:glutamate dehydrogenase [NAD(P)+] activity; P:cellular amino acid metabolic process; P:response to food; P:oxidation-reduction process	-
C201R064	phospholipid scramblase 1	1.71475	1.52309	50	1.7e-92	0.746	5	C:plasma membrane; C:integral component of membrane; F:phospholipid scramblase activity; F:metal ion binding; P:phospholipid scrambling	-
C026R133	herv-h ltr-associating protein 2-like	1.71436	2.0181	50	0	0.62	2	C:integral component of membrane; F:protein binding	-
C162R165	o-acetyl-adp-ribose deacetylase 1	1.71376	1.74957	50	4.4e-121	0.8308	3	F:purine nucleoside binding; F:deacetylase activity; P:purine nucleoside metabolic process	-
C208R169	protein nlrc3-like	1.71337	1.41095	50	1.8e-127	0.891	1	F:ATP binding	-
C223R127	probable atp-dependent rna helicase ddx5 isoform x2	1.71238	1.68374	50	0	0.9642	5	F:nucleic acid binding; F:ATP-dependent RNA helicase activity; F:ATP binding; P:RNA secondary structure unwinding; P:positive regulation of transcription, DNA-templated	-
C187R151	apolipoprotein l3	1.71178	1.66132	50	0	0.69	4	C:extracellular region; F:lipid binding; P:lipid transport; P:lipoprotein metabolic process	-
C066R166	mitochondrial endonuclease g	1.71159	1.60585	50	2.3e-143	0.8868	22	C:nucleus; C:mitochondrion; C:cytosol; C:perikaryon; F:nucleic acid binding; F:endonuclease activity; F:deoxyribonuclease activity; F:protein binding; F:metal ion binding; P:in utero embryonic development; P:DNA recombination; P:aging; P:response to mechanical stimulus; P:response to estradiol; P:response to tumor necrosis factor; P:neuron death in response to oxidative stress; P:response to anti…	-
C079R071	profilin-2-like isoform x2	1.71099	1.84676	50	1.5e-92	0.9314	2	F:actin binding; P:regulation of actin filament polymerization	-
C183R147	---NA---	1.7106	1.77995	0	-	-	-	-	-
C120R106	cytosolic sulfotransferase 3-like	1.71	2.03214	50	6.6e-130	0.8734	22	C:cytoplasm; F:N-acetylglucosamine 6-O-sulfotransferase activity; F:N-acetylgalactosamine 4-O-sulfotransferase activity; F:estrone sulfotransferase activity; F:heparan sulfate 2-O-sulfotransferase activity; F:HNK-1 sulfotransferase activity; F:heparan sulfate 6-O-sulfotransferase activity; F:trans-9R,10R-dihydrodiolphenanthrene sulfotransferase activity; F:1-phenanthrol sulfotransferase activity;…	-
C113R164	lipocalin-like	1.70862	1.79419	50	1.8e-148	0.8256	8	C:extracellular region; F:retinoic acid binding; F:prostaglandin-D synthase activity; F:cysteine-type endopeptidase inhibitor activity; F:transporter activity; P:lipid metabolic process; P:transport; P:negative regulation of endopeptidase activity	-
C146R142	dnaj homolog subfamily a member 1	1.70862	1.5942	50	0	0.861	30	C:ubiquitin ligase complex; C:nucleus; C:mitochondrion; C:cytosol; C:perinuclear region of cytoplasm; C:extracellular exosome; C:cytoplasmic side of endoplasmic reticulum membrane; F:G-protein coupled receptor binding; F:ATP binding; F:Hsp70 protein binding; F:ubiquitin protein ligase binding; F:metal ion binding; F:low-density lipoprotein particle receptor binding; F:unfolded protein binding; F:…	-
C163R053	---NA---	1.70842	1.42652	0	-	-	-	-	-
C238R008	af495883_1ca1 protein	1.70842	-	50	0	0.6048	2	F:nucleic acid binding; F:metal ion binding	-
C174R040	---NA---	1.70823	1.75544	0	-	-	-	-	-
C154R028	helicase with zinc finger domain 2	1.70803	1.54667	50	0	0.6576	2	F:ATP binding; F:metal ion binding	-
C258R093	lipocalin-like	1.70704	1.86133	50	1.8e-148	0.8256	8	C:extracellular region; F:retinoic acid binding; F:prostaglandin-D synthase activity; F:cysteine-type endopeptidase inhibitor activity; F:transporter activity; P:lipid metabolic process; P:transport; P:negative regulation of endopeptidase activity	-
C215R131	optineurin	1.70704	1.67811	50	0	0.7084	9	C:nucleus; C:Golgi apparatus; C:cytoplasmic membrane-bounded vesicle; F:K63-linked polyubiquitin binding; P:protein targeting to Golgi; P:axonogenesis; P:regulation of I-kappaB kinase/NF-kappaB signaling; P:vesicle localization; P:Golgi ribbon formation	-
C219R081	macrophage colony stimulating factor receptor-like protein	1.70507	1.67307	50	1.2e-172	0.7894	15	C:integral component of membrane; F:transmembrane receptor protein tyrosine kinase activity; F:ATP binding; F:cytokine binding; P:defense response; P:transmembrane receptor protein tyrosine kinase signaling pathway; P:positive regulation of macrophage chemotaxis; P:microglia differentiation; P:peptidyl-tyrosine phosphorylation; P:cytokine-mediated signaling pathway; P:melanocyte differentiation; …	-
C042R140	upf0729 protein c18orf32 homolog	1.70429	1.71099	50	5.1e-39	0.6312	1	C:ribonucleoprotein complex	-
C159R158	wash complex subunit 7	1.70094	1.80042	50	0	0.9682	4	C:endosome; C:WASH complex; P:endosome organization; P:endosomal transport	-
C007R095	rna-directed dna polymerase from mobile element jockey- partial	1.69957	2.12751	50	2e-78	0.5352	5	C:intracellular; F:guanyl-nucleotide exchange factor activity; P:small GTPase mediated signal transduction; P:actin cytoskeleton organization; P:positive regulation of GTPase activity	-
C122R025	g-protein coupled receptor 4-like	1.69957	1.63146	50	7.6e-75	0.7306	3	C:integral component of plasma membrane; F:G-protein coupled receptor activity; P:adenylate cyclase-activating G-protein coupled receptor signaling pathway	-
C173R069	cytohesin-interacting protein	1.69839	1.78406	50	0	0.675	2	C:cytoplasm; F:protein binding	-
C092R043	toll-like receptor 9	1.69839	1.72668	50	0	0.7346	5	C:endoplasmic reticulum; C:integral component of membrane; F:protein binding; P:toll-like receptor signaling pathway; P:antibacterial humoral response	-
C190R144	proteasome subunit beta type-9	1.69721	1.78798	50	3.7e-152	0.93	8	C:nucleus; C:cytoplasm; C:proteasome core complex; C:extracellular exosome; F:threonine-type endopeptidase activity; P:immune system process; P:proteasomal ubiquitin-independent protein catabolic process; P:proteasome-mediated ubiquitin-dependent protein catabolic process	-
C024R158	complement c1s subcomponent	1.69682	1.51607	50	0	0.607	5	C:extracellular region; F:serine-type endopeptidase activity; F:calcium ion binding; P:proteolysis; P:complement activation	-
C146R063	e3 ubiquitin-protein ligase rnf19a	1.69643	1.72688	50	9.4e-73	0.8988	20	C:ubiquitin ligase complex; C:cytoplasm; C:centrosome; C:integral component of membrane; F:transcription factor binding; F:zinc ion binding; F:UDP-N-acetylmuramoylalanyl-D-glutamyl-2,6-diaminopimelate-D-alanyl-D-alanine ligase activity; F:ribosomal S6-glutamic acid ligase activity; F:ubiquitin conjugating enzyme binding; F:coenzyme F420-0 gamma-glutamyl ligase activity; F:coenzyme F420-2 alpha-gl…	-
C123R169	fish virus induced trim protein	1.69623	1.75808	50	0	0.5704	2	C:intracellular; F:zinc ion binding	-
C158R085	e3 ubiquitin-protein ligase rnf213-like isoform x2	1.69408	1.78283	4	1.8e-13	0.6175	-	-	-
C252R080	f-box lrr-repeat protein 14	1.69388	1.50039	50	0	0.9736	6	C:nucleoplasm; C:Golgi apparatus; C:SCF ubiquitin ligase complex; F:ubiquitin protein ligase activity; P:SCF-dependent proteasomal ubiquitin-dependent protein catabolic process; P:protein ubiquitination involved in ubiquitin-dependent protein catabolic process	-
C148R104	translation initiation factor eif-2b subunit epsilon	1.69349	1.68822	50	0	0.8446	17	C:nucleus; C:eukaryotic translation initiation factor 2B complex; F:translation initiation factor activity; F:guanyl-nucleotide exchange factor activity; F:protein binding; F:nucleotidyltransferase activity; P:ovarian follicle development; P:response to heat; P:response to glucose; P:astrocyte development; P:oligodendrocyte development; P:response to endoplasmic reticulum stress; P:cellular respo…	-
C163R021	fatty acid desaturase 6	1.69271	1.64985	50	1.3e-108	0.8168	1	P:lipid metabolic process	-
C003R125	thiosulfate sulfurtransferase rhodanese-like domain-containing protein 1	1.69251	1.74291	50	7.9e-78	0.7518	2	F:transferase activity; P:metabolic process	-
C034R093	caspase-8-like isoform x1	1.69154	1.7593	50	2e-19	0.7696	19	C:nucleus; C:endosome; C:trans-Golgi network; C:proteasome regulatory particle, base subcomplex; C:integral component of membrane; C:clathrin-coated vesicle; F:DNA binding; F:transcription factor activity, sequence-specific DNA binding; F:transposase activity; F:transporter activity; F:metal ion binding; F:phosphatidylinositol-3,5-bisphosphate binding; P:transposition, DNA-mediated; P:regulation …	-
C243R072	scm-like with four mbt domains protein 1	1.69095	2.01601	50	4.9e-12	0.9648	4	C:nucleoplasm; F:histone binding; P:negative regulation of transcription, DNA-templated; P:negative regulation of muscle organ development	-
C199R106	purine nucleoside phosphorylase-like	1.69056	1.62713	50	0	0.9052	17	C:cytoplasm; C:extracellular exosome; F:nucleoside binding; F:purine nucleobase binding; F:purine-nucleoside phosphorylase activity; F:drug binding; F:phosphate ion binding; P:inosine catabolic process; P:nicotinamide riboside catabolic process; P:immune response; P:NAD biosynthesis via nicotinamide riboside salvage pathway; P:urate biosynthetic process; P:positive regulation of T cell proliferat…	-
C019R048	tumor necrosis factor receptor superfamily member 1b	1.68958	1.74533	50	0	0.5246	3	P:vasculature development; P:signal transduction; P:regulation of cysteine-type endopeptidase activity involved in apoptotic process	-
C088R038	microspherule protein 1	1.689	2.01252	50	2.1e-139	0.9358	19	C:histone acetyltransferase complex; C:nucleolus; C:cytoplasm; C:polysome; C:actin cytoskeleton; C:cell junction; C:dendrite; C:Ino80 complex; C:MLL1 complex; F:protein binding; F:histone acetyltransferase activity (H4-K5 specific); F:histone acetyltransferase activity (H4-K8 specific); F:histone acetyltransferase activity (H4-K16 specific); P:DNA repair; P:DNA recombination; P:regulation of tran…	-
C265R146	ribonuclease uk114	1.68822	1.44744	50	1.9e-95	0.8504	6	C:mitochondrion; C:extracellular exosome; F:endonuclease activity; F:deaminase activity; F:poly(A) RNA binding; P:nucleic acid phosphodiester bond hydrolysis	-
C222R042	preli domain-containing protein mitochondrial	1.68783	1.34195	50	3.5e-96	0.859	12	C:nucleoplasm; C:mitochondrial intermembrane space; C:protein complex; F:phosphatidic acid transporter activity; P:negative regulation of mitochondrial membrane potential; P:positive regulation of endopeptidase activity; P:regulation of T cell differentiation; P:positive regulation of T cell apoptotic process; P:negative regulation of release of cytochrome c from mitochondria; P:regulation of mem…	-
C025R095	---NA---	1.68705	1.74654	0	-	-	-	-	-
C042R053	sodium potassium calcium exchanger 4 isoform x1	1.68685	2.26917	50	7e-177	0.8678	3	C:integral component of plasma membrane; F:calcium, potassium:sodium antiporter activity; P:sodium ion transmembrane transport	-
C184R089	gig2-like protein	1.6849	2.13539	50	3.3e-149	0.6846	4	C:cytoplasm; F:NAD+ ADP-ribosyltransferase activity; P:metabolic process; P:defense response to virus	-
C154R152	---NA---	1.68432	1.7884	0	-	-	-	-	-
C079R089	immediate early response gene 2 protein	1.68354	1.54774	50	3.6e-116	0.6366	11	C:nucleus; C:cytoplasm; F:DNA binding; F:protein binding; P:determination of left/right symmetry; P:neuron differentiation; P:cell motility; P:convergent extension; P:cilium morphogenesis; P:Kupffer's vesicle development; P:response to fibroblast growth factor	-
C066R040	fatty acid desaturase 2-like	1.68335	1.62188	50	2e-49	0.9268	4	C:integral component of membrane; F:linoleoyl-CoA desaturase activity; P:lipid metabolic process; P:oxidation-reduction process	-
C108R129	poly [ADP-ribose] polymerase 12	1.68335	1.54703	50	0	0.7262	3	F:NAD+ ADP-ribosyltransferase activity; F:metal ion binding; P:metabolic process	-
C005R128	mf-25 protein	1.68315	2.05742	28	5.4e-40	0.5693	2	F:hydrolase activity; P:metabolic process	-
C161R115	---NA---	1.68024	1.66248	0	-	-	-	-	-
C110R077	traf family member-associated nf-kappa-b activator-like isoform x3	1.67985	1.4396	32	9.9e-115	0.5844	2	C:cytoplasm; P:I-kappaB kinase/NF-kappaB signaling	-
C237R067	---NA---	1.67946	2.38199	0	-	-	-	-	-
C054R016	poly [ADP-ribose] polymerase 12	1.67752	-	50	0	0.7048	3	F:NAD+ ADP-ribosyltransferase activity; F:metal ion binding; P:metabolic process	-
C256R161	ubiquitin-conjugating enzyme e2 b	1.67636	1.54882	50	5.7e-107	0.9822	42	C:nuclear chromatin; C:XY body; C:nucleoplasm; C:replication fork; C:cytosol; C:plasma membrane; C:HULC complex; F:ATP binding; F:ligase activity; F:ubiquitin protein ligase binding; F:ubiquitin protein ligase activity; F:ubiquitin conjugating enzyme activity; P:leptotene; P:response to hypoxia; P:in utero embryonic development; P:antigen processing and presentation of peptide antigen via MHC cla…	-
C190R136	dual specificity mitogen-activated protein kinase kinase 4-like isoform x1	1.6752	1.65806	50	6.6e-176	0.917	7	C:intracellular; F:protein serine/threonine kinase activity; F:ATP binding; F:JUN kinase kinase activity; P:activation of JUN kinase activity; P:determination of dorsal identity; P:convergent extension involved in gastrulation	-
C103R053	map kinase-activated protein kinase 3	1.67423	-	50	0	0.8982	13	C:cytoplasm; F:calmodulin-dependent protein kinase activity; F:signal transducer activity; F:calmodulin binding; F:ATP binding; F:calcium-dependent protein serine/threonine kinase activity; F:mitogen-activated protein kinase binding; P:MAPK cascade; P:toll-like receptor signaling pathway; P:cell surface receptor signaling pathway; P:peptidyl-serine phosphorylation; P:response to cytokine; P:prote…	-
C119R095	---NA---	1.67365	2.25871	0	-	-	-	-	-
C236R137	transgelin isoform x2	1.67327	1.49261	50	1.3e-141	0.895	1	F:actin filament binding	-
C240R168	ubiquitin carboxyl-terminal hydrolase cyld-like	1.67211	1.73267	50	2.6e-58	0.8212	8	C:intracellular; F:phosphatidylinositol phospholipase C activity; F:signal transducer activity; F:calcium ion binding; F:ubiquitinyl hydrolase activity; P:ubiquitin-dependent protein catabolic process; P:lipid catabolic process; P:intracellular signal transduction	-
C007R160	profilin-2-like isoform x1	1.67153	1.74594	50	8.4e-86	0.928	2	F:actin binding; P:regulation of actin filament polymerization	-
C263R030	aryl hydrocarbon receptor-like	1.67114	2.09943	50	0	0.707	10	C:cytoplasm; C:nuclear aryl hydrocarbon receptor complex; F:aryl hydrocarbon receptor activity; F:RNA polymerase II transcription factor activity, ligand-activated sequence-specific DNA binding; F:sequence-specific DNA binding; F:protein dimerization activity; P:response to toxic substance; P:positive regulation of transcription from RNA polymerase II promoter; P:cellular response to organic cycl…	-
C001R050	atp-dependent rna helicase ddx58	1.66979	1.58063	50	7.3e-179	0.7814	28	C:nucleus; C:cytosol; C:bicellular tight junction; C:actin cytoskeleton; C:ruffle membrane; F:DNA binding; F:double-stranded RNA binding; F:single-stranded RNA binding; F:helicase activity; F:ATP binding; F:zinc ion binding; F:identical protein binding; P:positive regulation of defense response to virus by host; P:I-kappaB kinase/NF-kappaB signaling; P:detection of virus; P:regulation of cell mig…	-
C120R065	echinoderm microtubule-associated 3 isoform x1	1.6696	1.66594	50	0	0.8814	3	F:catalytic activity; F:protein binding; P:metabolic process	-
C095R124	galectin-8-like	1.66902	-	50	0	0.7812	1	F:carbohydrate binding	-
C023R105	poly [ADP-ribose] polymerase 10	1.66825	1.97292	50	1.9e-26	0.8744	15	C:nucleoplasm; C:nucleolus; C:Golgi apparatus; F:nucleotide binding; F:nucleic acid binding; F:NAD+ ADP-ribosyltransferase activity; F:K63-linked polyubiquitin binding; P:regulation of chromatin assembly; P:negative regulation of NF-kappaB transcription factor activity; P:negative regulation of protein import into nucleus, translocation; P:negative regulation of viral genome replication; P:negati…	-
C009R107	rna-directed dna polymerase from mobile element jockey-like	1.66728	1.99861	50	3.2e-31	0.583	3	P:RNA-dependent DNA replication; F:RNA-directed DNA polymerase activity; F:RNA binding	-
C175R134	ras-related protein rab-7a	1.66709	1.64737	50	4.9e-146	0.982	31	C:lysosomal membrane; C:late endosome; C:Golgi apparatus; C:phagocytic vesicle membrane; C:retromer complex; C:pre-autophagosomal structure membrane; C:melanosome; C:terminal bouton; C:extracellular exosome; C:alveolar lamellar body; F:GTPase activity; F:GTP binding; F:GDP binding; F:Rac GTPase binding; P:protein targeting to lysosome; P:nucleocytoplasmic transport; P:epidermal growth factor cata…	-
C141R083	zinc finger protein ozf-like	1.66497	1.74432	50	2.8e-63	0.7282	2	F:nucleic acid binding; F:metal ion binding	-
C027R139	tapasin	1.66344	1.45313	50	0	0.8224	6	C:membrane; F:protein binding; P:response to virus; P:antigen processing and presentation of endogenous peptide antigen via MHC class I; P:response to exogenous dsRNA; P:innate immune response	-
C224R041	dnaj homolog subfamily a member 1	1.66344	1.40039	50	0	0.861	30	C:ubiquitin ligase complex; C:nucleus; C:mitochondrion; C:cytosol; C:perinuclear region of cytoplasm; C:extracellular exosome; C:cytoplasmic side of endoplasmic reticulum membrane; F:G-protein coupled receptor binding; F:ATP binding; F:Hsp70 protein binding; F:ubiquitin protein ligase binding; F:metal ion binding; F:low-density lipoprotein particle receptor binding; F:unfolded protein binding; F:…	-
C224R058	bh3-interacting domain death agonist	1.66267	1.77727	50	4e-137	0.5192	3	C:cytoplasm; P:cellular component organization; P:positive regulation of cysteine-type endopeptidase activity involved in apoptotic process	-
C023R011	metal regulatory transcription factor 1	1.6619	1.60659	50	1.3e-42	0.7556	14	C:nucleoplasm; C:cytoplasm; F:RNA polymerase II core promoter proximal region sequence-specific DNA binding; F:RNA polymerase II core promoter sequence-specific DNA binding; F:transcriptional activator activity, RNA polymerase II core promoter proximal region sequence-specific binding; F:transcription coactivator activity; F:zinc ion binding; F:histone acetyltransferase binding; P:response to oxi…	-
C054R095	apoptosis facilitator bcl-2-like protein 14	1.66171	-	50	4e-82	0.5982	4	C:cytosol; C:intracellular organelle; F:protein kinase binding; P:positive regulation of extrinsic apoptotic signaling pathway	-
C092R088	---NA---	1.66132	1.33284	0	-	-	-	-	-
C179R115	interleukin-34	1.66094	1.89452	50	3e-114	0.6362	4	C:extracellular space; F:macrophage colony-stimulating factor receptor binding; P:positive regulation of protein phosphorylation; P:positive regulation of cell proliferation	-
C045R128	interferon regulatory factor 3	1.65979	1.52767	50	0	0.6886	4	C:perinuclear region of cytoplasm; F:regulatory region DNA binding; F:transcription factor activity, sequence-specific DNA binding; P:regulation of transcription, DNA-templated	-
C211R128	kinesin light chain 1 isoform x1	1.65979	-	50	0	0.9538	4	C:kinesin complex; F:microtubule motor activity; F:protein binding; P:metabolic process	-
C242R043	---NA---	1.65921	1.58813	0	-	-	-	-	-
C118R132	cyclin- partial	1.65883	1.8551	50	0	0.688	1	P:regulation of cell cycle	-
C075R068	adp-ribosylation factor 4	1.65845	1.53457	50	1.4e-120	0.9718	19	C:Golgi apparatus; C:cytosol; C:ruffle membrane; C:extracellular exosome; F:epidermal growth factor receptor binding; F:GTP binding; F:hydrolase activity; P:protein ADP-ribosylation; P:intracellular protein transport; P:small GTPase mediated signal transduction; P:vesicle-mediated transport; P:cell migration; P:activation of phospholipase D activity; P:negative regulation of apoptotic process; P:…	-
C215R088	ubiquitin carboxyl-terminal hydrolase 14	1.65806	1.9894	50	0	0.922	21	C:nucleus; C:cell surface; C:cytoplasmic membrane-bounded vesicle; C:synapse; C:extracellular exosome; F:cysteine-type endopeptidase activity; F:protein serine/threonine kinase activity; F:ubiquitin-specific protease activity; F:endopeptidase inhibitor activity; F:ATP binding; F:GTP-Rho binding; F:proteasome binding; P:protein phosphorylation; P:Rho protein signal transduction; P:synaptic transmi…	-
C104R044	protein lbh	1.65749	1.6489	50	8.4e-53	0.921	7	C:extracellular region; C:nucleus; C:cytoplasm; P:neural crest cell migration; P:regulation of blood coagulation; P:positive regulation of transcription, DNA-templated; P:embryonic viscerocranium morphogenesis	-
C236R153	tumor necrosis factor ligand superfamily member 14-like	1.65749	-	50	2e-130	0.5872	6	C:extracellular space; C:membrane; F:cytokine activity; F:tumor necrosis factor receptor binding; P:immune response; P:positive regulation of cellular process	-
C123R079	unnamed protein product, partial	1.65672	2.18884	1	5.3e-09	0.8	-	-	-
C170R062	chromodomain-helicase-dna-binding protein 4-like isoform x1	1.65558	1.58374	50	0	0.9468	10	C:NuRD complex; F:DNA binding; F:ATP binding; F:microtubule binding; F:ATP-dependent helicase activity; F:zinc ion binding; P:chromatin organization; P:regulation of transcription, DNA-templated; P:fin regeneration; P:spindle assembly	-
C139R130	e3 ubiquitin-protein ligase rnf213-like	1.65538	1.86607	50	0	0.7722	5	F:nucleotide binding; F:ubiquitin-protein transferase activity; F:ATPase activity; F:metal ion binding; P:sprouting angiogenesis	-
C191R050	---NA---	1.65538	1.43015	0	-	-	-	-	-
C232R105	---NA---	1.65462	1.84101	0	-	-	-	-	-
C165R048	slam family member 8	1.65424	1.52838	50	0	0.6188	3	C:integral component of membrane; F:receptor activity; F:protein binding	-
C240R121	flavin reductase	1.6529	1.58758	50	5.5e-146	0.8784	8	C:nucleoplasm; C:cytosol; C:plasma membrane; C:extracellular exosome; F:biliverdin reductase activity; F:riboflavin reductase (NADPH) activity; P:heme catabolic process; P:small molecule metabolic process	-
C194R142	mitochondrial dicarboxylate carrier	1.6529	1.45851	50	9.2e-21	0.8672	15	C:nucleus; C:mitochondrial inner membrane; C:ribosome; C:integral component of membrane; F:structural constituent of ribosome; F:dicarboxylic acid transmembrane transporter activity; F:protein binding; F:secondary active transmembrane transporter activity; P:sulfur amino acid catabolic process; P:gluconeogenesis; P:translation; P:dicarboxylic acid transport; P:mitochondrial transport; P:transmemb…	-
C162R095	microfibrillar-associated protein 1	1.65195	1.45481	50	8.2e-55	0.9062	4	C:microfibril; F:protein binding; F:poly(A) RNA binding; P:extracellular matrix organization	-
C096R017	kynurenine 3-monooxygenase	1.65176	-	50	1.6e-106	0.8556	13	C:mitochondrial outer membrane; C:integral component of membrane; F:kynurenine 3-monooxygenase activity; F:NAD(P)H oxidase activity; F:FAD binding; P:response to yeast; P:tryptophan catabolic process; P:quinolinate biosynthetic process; P:'de novo' NAD biosynthetic process from tryptophan; P:anthranilate metabolic process; P:secondary metabolite biosynthetic process; P:oxidation-reduction process…	-
C261R073	signal transducer and activator of transcription 1	1.65099	1.58924	50	2.5e-99	0.8006	38	C:nuclear chromatin; C:nucleoplasm; C:nucleolus; C:cytosol; C:axon; C:dendrite; C:perinuclear region of cytoplasm; F:RNA polymerase II core promoter proximal region sequence-specific DNA binding; F:RNA polymerase II core promoter sequence-specific DNA binding; F:transcription factor activity, RNA polymerase II core promoter sequence-specific; F:signal transducer activity; F:tumor necrosis factor …	-
C012R086	plasma membrane calcium-transporting atpase 1-like isoform x1	1.65004	-	50	1.6e-96	0.877	11	C:Golgi apparatus; C:plasma membrane; C:integral component of membrane; C:extracellular vesicle; F:calcium-transporting ATPase activity; F:calmodulin binding; F:ATP binding; F:metal ion binding; P:blood coagulation; P:metabolic process; P:calcium ion transmembrane transport	-
C062R031	synaptic vesicle glycoprotein 2b-like	1.64966	1.45246	50	1.3e-76	0.9048	3	C:integral component of membrane; F:transmembrane transporter activity; P:transmembrane transport	-
C135R019	flavin reductase	1.64947	1.76643	50	7.8e-156	0.8782	4	C:cytoplasm; C:membrane-bounded organelle; F:oxidoreductase activity; P:single-organism metabolic process	-
C089R038	solute carrier family 35 member c2	1.64928	1.51922	50	1e-38	0.7848	5	C:integral component of membrane; C:intracellular membrane-bounded organelle; P:fucosylation; P:regulation of biological process; P:transmembrane transport	-
C237R013	interferon-induced protein 44-like	1.64928	-	50	4.4e-108	0.6518	1	F:GTP binding	-
C086R032	tpa: transposase	1.64832	1.6131	50	5.8e-108	0.7916	5	F:DNA binding; F:transposase activity; P:transposition, DNA-mediated; P:neuron-neuron synaptic transmission; P:DNA integration	-
C076R169	---NA---	1.64832	1.47973	0	-	-	-	-	-
C156R085	tyrosyl-dna phosphodiesterase partial	1.64813	1.88122	50	0	0.7118	11	C:PML body; F:magnesium ion binding; F:single-stranded DNA binding; F:3',5'-cyclic-nucleotide phosphodiesterase activity; F:manganese ion binding; F:inositol phosphorylceramide phospholipase activity; F:5'-tyrosyl-DNA phosphodiesterase activity; P:double-strand break repair; P:determination of left/right symmetry; P:negative regulation of transforming growth factor beta receptor signaling pathway…	-
C098R140	lysophosphatidic acid phosphatase type 6	1.64794	1.75119	50	0	0.7858	2	F:acid phosphatase activity; P:protein dephosphorylation	-
C160R161	e2f-associated phosphoprotein	1.64794	1.68997	50	0	0.7244	3	C:nucleus; P:positive regulation of cell proliferation; P:regulation of transcription elongation from RNA polymerase II promoter	-
C105R168	mitochondrial import receptor subunit tom34	1.64756	2.02371	50	0	0.7798	4	C:nucleus; C:mitochondrion; C:membrane; C:intracellular organelle part	-
C014R131	suppressor of g2 allele of skp1 homolog	1.6468	1.92563	50	0	0.8334	1	C:intracellular part	-
C203R128	ubiquitin-conjugating enzyme e2 l3	1.6468	1.72967	50	2.1e-86	0.9674	19	C:ubiquitin ligase complex; C:nucleus; C:cytoplasm; C:extracellular exosome; F:transcription coactivator activity; F:ATP binding; F:ligase activity; F:ubiquitin protein ligase binding; F:poly(A) RNA binding; F:ubiquitin conjugating enzyme activity; F:ubiquitin-protein transferase activator activity; P:regulation of transcription, DNA-templated; P:cell proliferation; P:protein ubiquitination invol…	-
C251R099	heat shock protein hsp 90-alpha	1.64661	1.66248	50	0	0.9458	61	C:nucleoplasm; C:mitochondrion; C:cytosol; C:cell surface; C:basolateral plasma membrane; C:apical plasma membrane; C:extracellular matrix; C:brush border membrane; C:ruffle membrane; C:melanosome; C:neuron projection; C:neuronal cell body; C:myelin sheath; C:protein complex; C:perinuclear region of cytoplasm; C:extracellular exosome; C:endocytic vesicle lumen; F:UTP binding; F:CTP binding; F:mRN…	-
C256R028	zinc-binding protein a33-like	1.64623	1.58685	50	1.6e-78	0.7422	4	F:catalytic activity; F:protein binding; F:zinc ion binding; P:metabolic process	-
C210R120	proline-serine-threonine phosphatase-interacting protein 1-like	1.64623	1.44961	50	0	0.7974	11	C:stress fiber; C:actomyosin contractile ring; C:membrane; C:cleavage furrow; F:actin binding; F:protein phosphatase binding; P:cytokinesis; P:immune system process; P:endocytosis; P:defense response; P:cell migration	-
C165R037	acetyl-coenzyme a cytoplasmic-like	1.64585	1.46172	50	2.1e-143	0.8936	4	F:acetate-CoA ligase activity; F:ATP binding; F:AMP binding; P:acetyl-CoA biosynthetic process from acetate	-
C091R008	unnamed protein product	1.64585	-	2	2.5e-21	0.82	3	F:protein kinase activity; F:ATP binding; P:protein phosphorylation	-
C240R143	---NA---	1.64566	1.82344	0	-	-	-	-	-
C040R035	ras-related protein rab- isoform narr-like	1.6449	1.7744	2	8e-08	0.495	-	-	-
C026R087	nicotinamide phosphoribosyltransferase	1.64471	1.71119	50	0	0.94	14	C:extracellular space; C:nucleus; C:cytoplasm; C:extracellular exosome; F:nicotinate-nucleotide diphosphorylase (carboxylating) activity; F:cytokine activity; F:drug binding; F:protein homodimerization activity; F:nicotinamide phosphoribosyltransferase activity; P:NAD biosynthetic process; P:circadian regulation of gene expression; P:positive regulation of transcription from RNA polymerase II pro…	-
C154R056	protein nlrc3-like	1.64471	-	50	2.4e-86	0.86	2	F:protein binding; F:ATP binding	-
C002R072	---NA---	1.64414	1.56464	0	-	-	-	-	-
C158R014	galectin-9-like	1.64395	-	50	0	0.6374	1	F:carbohydrate binding	-
C183R130	dentin sialophospho isoform x2	1.64376	1.90902	9	1.1e-75	0.4933	-	-	-
C212R035	geranylgeranyl transferase type-2 subunit alpha	1.64338	1.52961	50	0	0.8162	6	C:Rab-protein geranylgeranyltransferase complex; F:Rab geranylgeranyltransferase activity; F:zinc ion binding; F:Rab GTPase binding; P:visual perception; P:protein geranylgeranylation	-
C236R116	---NA---	1.643	1.44944	0	-	-	-	-	-
C018R134	sugar phosphate exchanger 3	1.64281	1.64699	50	1.1e-78	0.8872	4	C:integral component of membrane; F:organophosphate:inorganic phosphate antiporter activity; P:phosphate ion transmembrane transport; P:phosphate ion homeostasis	-
C060R002	protein quaking-a isoform x3	1.64167	1.42241	50	4.2e-125	0.9702	12	C:nucleus; C:cytoplasm; F:RNA binding; F:SH3 domain binding; P:mRNA processing; P:regulation of translation; P:skeletal muscle tissue development; P:RNA splicing; P:regulation of smoothened signaling pathway; P:cell differentiation; P:mRNA transport; P:3'-UTR-mediated mRNA stabilization	-
C146R162	rab5 gdp gtp exchange factor-like	1.64129	1.61049	50	0	0.7036	2	F:DNA binding; F:zinc ion binding	-
C015R068	long-chain-fatty-acid-- ligase 4	1.64035	1.60826	50	0	0.9002	17	C:mitochondrion; C:lipid particle; C:membrane; C:ER-mitochondrion membrane contact site; C:extracellular exosome; F:long-chain fatty acid-CoA ligase activity; F:very long-chain fatty acid-CoA ligase activity; F:arachidonate-CoA ligase activity; P:long-chain fatty acid metabolic process; P:lipid biosynthetic process; P:dorsal/ventral pattern formation; P:neuron differentiation; P:positive regulati…	-
C026R078	transposable element tcb1 transposase	1.63997	1.87341	50	7.7e-36	0.7022	21	C:integral component of membrane; C:SWI/SNF complex; F:DNA binding; F:monooxygenase activity; F:transmembrane receptor protein tyrosine kinase activity; F:transposase activity; F:ubiquitin-protein transferase activity; F:ATP binding; F:mechanically-gated ion channel activity; F:oxidoreductase activity, acting on paired donors, with incorporation or reduction of molecular oxygen; F:ligase activity…	-
C031R110	microspherule protein 1	1.63959	1.80354	50	2.1e-131	0.9244	17	C:histone acetyltransferase complex; C:nucleolus; C:cytoplasm; C:actin cytoskeleton; C:cell junction; C:Ino80 complex; C:MLL1 complex; F:protein binding; F:histone acetyltransferase activity (H4-K5 specific); F:histone acetyltransferase activity (H4-K8 specific); F:histone acetyltransferase activity (H4-K16 specific); P:DNA repair; P:DNA recombination; P:regulation of transcription, DNA-templated…	-
C065R132	methionine synthase	1.6394	1.61515	50	2.1e-146	0.8348	23	C:telomerase holoenzyme complex; C:cytosol; F:template for synthesis of G-rich strand of telomere DNA activity; F:protein binding; F:folic acid binding; F:zinc ion binding; F:methionine synthase activity; F:S-adenosylmethionine-homocysteine S-methyltransferase activity; F:cobalamin binding; P:protein methylation; P:xenobiotic metabolic process; P:methionine biosynthetic process; P:cobalamin metab…	-
C128R095	legumain	1.63883	1.61161	50	0	0.8368	4	F:peptidase activity; P:proteolysis; P:axon regeneration; P:tissue regeneration	-
C106R161	tapasin	1.63751	1.49054	50	0	0.8224	6	C:membrane; F:protein binding; P:response to virus; P:antigen processing and presentation of endogenous peptide antigen via MHC class I; P:response to exogenous dsRNA; P:innate immune response	-
C249R109	unnamed protein product	1.63694	2.18177	1	7.1e-06	0.68	1	P:transport	-
C128R001	mitogen-activated protein kinase 12	1.63637	1.62094	50	0	0.9088	5	C:cytoplasm; F:MAP kinase activity; F:ATP binding; P:MAPK cascade; P:regulation of transcription, DNA-templated	-
C256R079	slam family member 8	1.63618	1.71812	50	0	0.6188	3	C:integral component of membrane; F:receptor activity; F:protein binding	-
C197R074	---NA---	1.63618	1.66536	0	-	-	-	-	-
C150R051	unnamed protein product	1.63599	1.62094	1	7.4e-15	0.93	3	F:ligase activity; P:metabolic process; P:protein homooligomerization	-
C182R027	heat shock protein hsp 90-alpha	1.63524	1.8954	50	0	0.9458	61	C:nucleoplasm; C:mitochondrion; C:cytosol; C:cell surface; C:basolateral plasma membrane; C:apical plasma membrane; C:extracellular matrix; C:brush border membrane; C:ruffle membrane; C:melanosome; C:neuron projection; C:neuronal cell body; C:myelin sheath; C:protein complex; C:perinuclear region of cytoplasm; C:extracellular exosome; C:endocytic vesicle lumen; F:UTP binding; F:CTP binding; F:mRN…	-
C117R036	tyrosine-protein kinase jak1	1.63505	1.68257	50	0	0.7364	29	C:nucleus; C:cytosol; C:cytoskeleton; C:focal adhesion; C:endomembrane system; C:extrinsic component of cytoplasmic side of plasma membrane; F:non-membrane spanning protein tyrosine kinase activity; F:growth hormone receptor binding; F:ATP binding; F:protein phosphatase binding; F:ubiquitin protein ligase binding; F:CCR5 chemokine receptor binding; P:activation of MAPKK activity; P:epidermal grow…	-
C144R144	protein smg9	1.63486	1.61832	50	0	0.8852	3	C:intracellular; F:identical protein binding; P:nuclear-transcribed mRNA catabolic process, nonsense-mediated decay	-
C082R074	unnamed protein product	1.63467	1.4624	1	5.4e-24	0.94	3	F:protein tyrosine phosphatase activity; F:protein tyrosine/serine/threonine phosphatase activity; P:peptidyl-tyrosine dephosphorylation	-
C234R146	nuclear factor nf-kappa-b p105 subunit	1.63429	1.361	50	3.9e-137	0.722	13	C:nucleus; C:cytoplasm; F:transcription regulatory region sequence-specific DNA binding; F:transcription factor activity, sequence-specific DNA binding; F:protein binding; P:regulation of transcription from RNA polymerase II promoter; P:signal transduction; P:response to external stimulus; P:positive regulation of macromolecule biosynthetic process; P:negative regulation of macromolecule biosynth…	-
C216R157	serine threonine-protein phosphatase 2a activator	1.63373	1.8184	50	0	0.9062	20	C:protein phosphatase type 2A complex; C:nucleoplasm; C:cytoplasm; C:calcium channel complex; C:extracellular exosome; F:peptidyl-prolyl cis-trans isomerase activity; F:receptor binding; F:ATP binding; F:protein tyrosine phosphatase activator activity; F:protein phosphatase type 2A regulator activity; F:ATPase activity; F:protein homodimerization activity; F:protein heterodimerization activity; F…	-
C211R093	polyketide synthase type i	1.63335	1.86865	50	3e-22	0.489	20	F:nucleic acid binding; F:ATP binding; F:protein kinase activity; P:DNA integration; P:protein phosphorylation; F:calcium ion binding; P:homophilic cell adhesion via plasma membrane adhesion molecules; C:membrane; F:cofactor binding; F:transferase activity; P:metabolic process; F:catalytic activity; F:phosphopantetheine binding; P:neuropeptide signaling pathway; C:extracellular region; C:lysosoma…	-
C249R106	glycosyltransferase 8 domain-containing protein 1	1.63316	1.61254	50	0	0.855	34	C:integral component of membrane; F:alpha-1,2-mannosyltransferase activity; F:alpha-1,3-mannosyltransferase activity; F:alpha-1,3-galactosyltransferase activity; F:UDP-glucose:glycoprotein glucosyltransferase activity; F:glycolipid mannosyltransferase activity; F:oligosaccharyl transferase activity; F:dolichyl-phosphate-glucose-glycolipid alpha-glucosyltransferase activity; F:acetylglucosaminyltr…	-
C218R137	cytosolic sulfotransferase 3-like	1.63222	1.93366	50	6.6e-130	0.8734	22	C:cytoplasm; F:N-acetylglucosamine 6-O-sulfotransferase activity; F:N-acetylgalactosamine 4-O-sulfotransferase activity; F:estrone sulfotransferase activity; F:heparan sulfate 2-O-sulfotransferase activity; F:HNK-1 sulfotransferase activity; F:heparan sulfate 6-O-sulfotransferase activity; F:trans-9R,10R-dihydrodiolphenanthrene sulfotransferase activity; F:1-phenanthrol sulfotransferase activity;…	-
C005R145	antigen peptide transporter 1	1.63222	1.49174	50	0	0.792	10	C:TAP complex; F:ATP binding; F:peptide-transporting ATPase activity; F:MHC protein binding; F:TAP2 binding; P:metabolic process; P:peptide transport; P:antigen processing and presentation of endogenous peptide antigen via MHC class I; P:intracellular transport; P:transmembrane transport	-
C266R028	---NA---	1.63203	1.78303	0	-	-	-	-	-
C262R115	interferon regulatory factor 1	1.63203	1.56266	50	0	0.6856	8	C:nucleus; F:regulatory region DNA binding; F:transcription factor activity, sequence-specific DNA binding; P:regulation of transcription, DNA-templated; P:apoptotic process; P:negative regulation of cell proliferation; P:response to peptide hormone; P:regulation of immune response	-
C136R030	nucleolar protein 58	1.63146	1.59567	50	0	0.9574	9	C:cytoplasm; C:Cajal body; C:membrane; C:box C/D snoRNP complex; C:small-subunit processome; C:pre-snoRNP complex; F:snoRNA binding; F:poly(A) RNA binding; P:rRNA modification	-
C115R081	nedd4-like e3 ubiquitin-protein ligase wwp2 isoform x1	1.63109	1.77399	50	0	0.8424	29	C:ubiquitin ligase complex; C:nucleus; C:cytoplasm; C:membrane; C:extracellular exosome; F:RNA polymerase II transcription factor binding; F:transcriptional activator activity, RNA polymerase II transcription factor binding; F:UDP-N-acetylmuramoylalanyl-D-glutamyl-2,6-diaminopimelate-D-alanyl-D-alanine ligase activity; F:ribosomal S6-glutamic acid ligase activity; F:coenzyme F420-0 gamma-glutamyl…	-
C019R160	---NA---	1.6309	1.70153	0	-	-	-	-	-
C144R068	ran-specific gtpase-activating protein	1.63071	1.71574	50	1.9e-58	0.953	7	C:cytoplasm; C:centrosome; F:GTPase activator activity; P:spindle organization; P:positive regulation of GTPase activity; P:positive regulation of mitotic centrosome separation; P:intracellular transport	-
C116R156	adp-ribosylation factor 4	1.63071	1.66671	50	1.4e-120	0.9718	19	C:Golgi apparatus; C:cytosol; C:ruffle membrane; C:extracellular exosome; F:epidermal growth factor receptor binding; F:GTP binding; F:hydrolase activity; P:protein ADP-ribosylation; P:intracellular protein transport; P:small GTPase mediated signal transduction; P:vesicle-mediated transport; P:cell migration; P:activation of phospholipase D activity; P:negative regulation of apoptotic process; P:…	-
C168R099	vacuolar protein sorting-associated protein 4b isoform x1	1.63071	1.62244	50	0	0.9448	4	F:ATP binding; F:microtubule-severing ATPase activity; P:vacuole organization; P:cytoplasmic microtubule organization	-
C170R019	apoptotic protease-activating factor 1	1.63033	1.41503	50	1.3e-147	0.803	8	C:apoptosome; F:protein binding; F:ATP binding; F:peptidase activity; F:cysteine-type endopeptidase activator activity involved in apoptotic process; F:ADP binding; P:activation of cysteine-type endopeptidase activity involved in apoptotic process by cytochrome c; P:apoptotic signaling pathway	-
C123R129	tripartite motif-containing protein 16-like	1.63014	1.54542	50	3.1e-131	0.7494	2	C:intracellular; F:zinc ion binding	-
C220R156	map7 domain-containing protein 1-like isoform x1	1.62958	1.5748	50	5.6e-156	0.6148	3	F:DNA binding; F:nuclease activity; P:cellular process	-
C203R159	mitochondrial import receptor subunit tom34	1.62939	1.93009	50	0	0.7798	4	C:nucleus; C:mitochondrion; C:membrane; C:intracellular organelle part	-
C023R099	toll-like receptor 1	1.62789	1.44727	50	2.5e-99	0.8526	10	C:integral component of membrane; F:transmembrane signaling receptor activity; F:protein binding; P:MyD88-dependent toll-like receptor signaling pathway; P:inflammatory response; P:toll-like receptor 6 signaling pathway; P:T-helper 1 type immune response; P:detection of diacyl bacterial lipopeptide; P:positive regulation of interleukin-6 biosynthetic process; P:regulation of cytokine secretion	-
C199R149	alpha beta hydrolase domain-containing protein 14b	1.6277	1.68199	50	1.4e-135	0.8254	4	C:nucleus; C:cytoplasm; F:hydrolase activity; P:metabolic process	-
C174R069	trna selenocysteine 1-associated protein 1	1.62751	1.69917	50	3.9e-132	0.7716	5	C:nucleus; C:cytoplasm; F:nucleotide binding; F:poly(A) RNA binding; P:translation	-
C063R145	c-myc-binding protein	1.62695	1.70783	50	1.7e-26	0.7994	3	F:transcription coactivator activity; P:regulation of transcription, DNA-templated; P:positive regulation of smoothened signaling pathway	-
C197R126	phosphatidylinositol -bisphosphate 3-kinase catalytic subunit delta isoform	1.62676	1.7783	50	2.2e-22	0.9794	57	C:nucleus; C:cytosol; C:plasma membrane; C:phosphatidylinositol 3-kinase complex; C:mast cell granule; F:acid phosphatase activity; F:ATP binding; F:1-phosphatidylinositol-3-kinase activity; F:1-phosphatidylinositol-4-phosphate 3-kinase activity; F:insulin receptor substrate binding; F:phosphatidylinositol-4,5-bisphosphate 3-kinase activity; P:activation of MAPK activity; P:natural killer cell di…	-
C082R048	nedd4-like e3 ubiquitin-protein ligase wwp2 isoform x1	1.62544	1.68432	50	0	0.9366	26	C:nucleus; C:cytoplasm; C:membrane; C:extracellular exosome; F:transcriptional activator activity, RNA polymerase II transcription factor binding; F:transcription factor binding; F:UDP-N-acetylmuramoylalanyl-D-glutamyl-2,6-diaminopimelate-D-alanyl-D-alanine ligase activity; F:ribosomal S6-glutamic acid ligase activity; F:coenzyme F420-0 gamma-glutamyl ligase activity; F:coenzyme F420-2 alpha-glut…	-
C248R119	nesprin-1 isoform x6	1.6251	-	9	6.6e-27	0.5211	3	P:regulation of apoptotic process; P:biological_process; C:cellular_component	-
C244R158	tnfaip3-interacting protein 1 isoform x1	1.62507	1.58063	50	0	0.7396	2	F:molecular_function; C:cellular_component	-
C254R089	tropomyosin alpha-3 chain isoform x4	1.62507	1.47444	50	9.5e-114	0.9164	14	C:stress fiber; C:podosome; C:cytosol; C:muscle thin filament tropomyosin; C:brush border; C:growth cone; C:cortical cytoskeleton; C:filamentous actin; C:cleavage furrow; C:extracellular exosome; F:actin binding; P:cell adhesion; P:brain development; P:muscle filament sliding	-
C145R108	t-cell leukemia translocation-altered gene protein homolog	1.62469	-	50	1.8e-51	0.8032	13	C:ruffle; C:nucleus; C:focal adhesion; C:integral component of membrane; F:protein kinase activity; F:structural constituent of cytoskeleton; F:ATP binding; F:zinc ion binding; F:actin filament binding; P:mRNA processing; P:protein phosphorylation; P:cytoskeletal anchoring at plasma membrane; P:cell adhesion	-
C194R097	dnaj homolog subfamily a member 4	1.6245	1.9406	50	1.1e-42	0.829	10	C:cytosol; C:membrane; F:ATP binding; F:heat shock protein binding; F:metal ion binding; F:unfolded protein binding; F:chaperone binding; P:response to heat; P:protein refolding; P:negative regulation of inclusion body assembly	-
C017R095	heat shock 70 kda protein 4-like	1.62338	1.67423	50	4.2e-159	0.931	20	C:nucleus; C:mitochondrion; C:lipid particle; C:cytosol; C:extracellular exosome; F:RNA polymerase II transcription factor binding; F:ATP binding; F:protein complex binding; F:activating transcription factor binding; P:kidney development; P:negative regulation of protein phosphorylation; P:response to heat; P:positive regulation of gene expression; P:negative regulation of gene expression; P:posi…	-
C123R045	formin-like protein 1	1.62225	1.4431	50	1.5e-169	0.8646	15	C:cytosol; C:plasma membrane; C:cell cortex; C:bleb; C:phagocytic vesicle; C:extracellular exosome; F:profilin binding; F:GTPase activating protein binding; F:Rac GTPase binding; F:actin filament binding; P:substrate-dependent cell migration; P:small GTPase mediated signal transduction; P:regulation of cell shape; P:cortical actin cytoskeleton organization; P:actin filament severing	-
C092R094	sodium- and chloride-dependent taurine transporter-like	1.62188	1.46121	50	0	0.9526	6	C:integral component of plasma membrane; F:neurotransmitter:sodium symporter activity; F:taurine:sodium symporter activity; P:amino acid transmembrane transport; P:neurotransmitter transport; P:taurine transport	-
C177R145	39s ribosomal protein mitochondrial	1.62019	1.72051	50	6.8e-26	0.8044	4	C:mitochondrial large ribosomal subunit; F:structural constituent of ribosome; F:hydrolase activity; P:translation	-
C036R068	---NA---	1.61982	1.73528	0	-	-	1	C:integral component of membrane	-
C225R009	lysine-specific histone demethylase 1b	1.61982	1.40948	50	0	0.9296	6	F:DNA binding; F:methyltransferase activity; F:zinc ion binding; F:oxidoreductase activity; P:methylation; P:oxidation-reduction process	-
C165R165	iron-responsive element-binding protein 2	1.61926	1.42438	50	0	0.8924	20	C:mitochondrion; C:endoplasmic reticulum; C:Golgi apparatus; C:cytosol; F:iron-responsive element binding; F:translation repressor activity; F:metal ion binding; F:4 iron, 4 sulfur cluster binding; P:protoporphyrinogen IX biosynthetic process; P:iron ion transport; P:cellular iron ion homeostasis; P:aging; P:post-embryonic development; P:response to iron(II) ion; P:negative regulation of translat…	-
C146R153	leucine-rich repeat-containing protein c10orf11 homolog	1.61888	-	50	6.5e-111	0.7942	2	F:protein binding; P:melanocyte differentiation	-
C003R090	arrestin domain-containing protein 2 isoform x1	1.61851	1.92363	50	0	0.9006	3	F:molecular_function; P:biological_process; C:cellular_component	-
C094R099	ras-related protein rab-24	1.61814	1.52891	50	6.6e-124	0.9084	13	C:mitochondrion; C:endosome; C:autophagosome; C:cytosol; C:membrane; C:endocytic vesicle; F:GTPase activity; F:protein binding; F:GTP binding; P:intracellular protein transport; P:nucleocytoplasmic transport; P:autophagy; P:Rab protein signal transduction	-
C046R101	dysbindin-like	1.61795	1.4456	50	5.8e-55	0.8712	32	C:nucleus; C:endoplasmic reticulum membrane; C:endosome membrane; C:postsynaptic density; C:sarcoplasm; C:cell junction; C:axon; C:growth cone; C:synaptic vesicle membrane; C:BLOC-1 complex; C:melanosome membrane; C:sarcolemma; C:presynaptic membrane; C:dendritic spine; C:postsynaptic membrane; F:calcium ion binding; F:protein binding; P:positive regulation of neurotransmitter secretion; P:post-G…	-
C008R099	aspartate mitochondrial	1.61702	1.66094	50	0	0.9174	16	C:mitochondrial inner membrane; C:plasma membrane; C:myelin sheath; C:extracellular exosome; F:L-aspartate:2-oxoglutarate aminotransferase activity; F:pyridoxal phosphate binding; F:identical protein binding; F:poly(A) RNA binding; F:L-phenylalanine:2-oxoglutarate aminotransferase activity; P:oxaloacetate metabolic process; P:aspartate biosynthetic process; P:aspartate catabolic process; P:fatty …	-
C240R027	epidermal growth factor receptor kinase substrate 8-like protein 1	1.61702	1.41667	50	8.7e-30	0.7076	5	F:molecular_function; P:biological_process; C:cellular_component; F:kinase activity; P:phosphorylation	-
C036R105	forkhead box protein p1 isoform x1	1.61533	1.60047	49	1.7e-10	0.8906	5	C:nucleus; F:transcription factor activity, sequence-specific DNA binding; F:sequence-specific DNA binding; F:metal ion binding; P:regulation of transcription, DNA-templated	-
C253R039	---NA---	1.61515	1.59918	0	-	-	-	-	-
C192R103	daz-associated protein 1 isoform x1	1.61515	1.36305	50	0	0.8736	2	F:nucleotide binding; F:nucleic acid binding	-
C085R089	zinc finger protein aiolos-like isoform x1	1.61478	1.52063	50	1.3e-34	0.9538	12	C:nucleus; C:cytoplasm; C:plasma membrane; F:RNA polymerase II regulatory region sequence-specific DNA binding; F:transcriptional activator activity, RNA polymerase II transcription regulatory region sequence-specific binding; F:protein homodimerization activity; F:metal ion binding; F:protein heterodimerization activity; P:regulation of B cell proliferation; P:regulation of apoptotic process; P:…	-
C161R084	cyclin- partial	1.61478	-	50	0	0.688	1	P:regulation of cell cycle	-
C028R146	cmp-n-acetylneuraminate-beta-galactosamide-alpha- -sialyltransferase 1	1.61403	1.74473	50	2.7e-22	0.8156	13	C:integral component of Golgi membrane; C:extracellular exosome; F:beta-galactoside (CMP) alpha-2,3-sialyltransferase activity; P:ganglioside biosynthetic process; P:N-acetylneuraminate metabolic process; P:protein phosphorylation; P:dolichol-linked oligosaccharide biosynthetic process; P:oligosaccharide metabolic process; P:O-glycan processing; P:keratan sulfate biosynthetic process; P:protein N…	-
C187R012	unconventional myosin-ixb	1.61366	1.55527	50	0	0.8362	7	C:myosin complex; F:motor activity; F:GTPase activator activity; F:ATP binding; F:metal ion binding; P:intracellular signal transduction; P:positive regulation of GTPase activity	-
C210R165	tyrosine-protein kinase lyn isoform x1	1.61347	1.64756	50	0	0.884	22	C:extrinsic component of cytoplasmic side of plasma membrane; F:non-membrane spanning protein tyrosine kinase activity; F:receptor binding; F:ATP binding; P:Fc receptor mediated stimulatory signaling pathway; P:tolerance induction to self antigen; P:platelet degranulation; P:regulation of B cell apoptotic process; P:cellular response to DNA damage stimulus; P:transmembrane receptor protein tyrosi…	-
C225R138	inactive rhomboid protein 2	1.61235	1.3632	50	0	0.8918	7	C:endoplasmic reticulum membrane; C:plasma membrane; C:integral component of membrane; F:serine-type endopeptidase activity; P:protein processing; P:regulation of epidermal growth factor receptor signaling pathway; P:negative regulation of protein secretion	-
C104R110	---NA---	1.61198	1.68413	0	-	-	-	-	-
C050R063	paired box protein and transposase domain containing protein	1.61179	1.5351	50	2.1e-42	0.7138	19	C:nucleus; C:endosome; C:trans-Golgi network; C:integral component of membrane; C:clathrin-coated vesicle; F:DNA binding; F:transcription factor activity, sequence-specific DNA binding; F:transposase activity; F:transporter activity; F:zinc ion binding; F:oxidoreductase activity; F:hydrolase activity, acting on ester bonds; F:phosphatidylinositol-3,5-bisphosphate binding; P:transposition, DNA-med…	-
C097R137	protein fam167b	1.61105	-	50	3.9e-63	0.666	-	-	-
C203R101	atp-binding cassette sub-family f member 2	1.61105	-	50	0	0.9404	9	C:nucleosome; C:nucleus; C:mitochondrion; C:membrane; F:DNA binding; F:ATP binding; F:ATPase activity; F:protein heterodimerization activity; P:metabolic process	-
C033R145	pannexin-1	1.61068	2.04202	50	7.7e-69	0.8902	22	C:endoplasmic reticulum membrane; C:plasma membrane; C:gap junction; C:integral component of membrane; C:bleb; C:protein complex; F:protease binding; F:receptor binding; F:calcium channel activity; F:leak channel activity; F:ion channel binding; F:protein heterodimerization activity; F:actin filament binding; F:gap junction hemi-channel activity; F:scaffold protein binding; P:response to ischemia…	-
C162R145	lysosomal alpha-mannosidase	1.61068	1.3154	50	3.5e-169	0.8558	21	C:extracellular space; C:lysosome; C:vacuolar membrane; C:extracellular exosome; F:zinc ion binding; F:lytic transglycosylase activity; F:mannosyl-oligosaccharide mannosidase activity; F:galactosidase activity; F:trehalase activity; F:fucosidase activity; F:hexosaminidase activity; F:amylase activity; F:carbohydrate binding; F:dextrin alpha-glucosidase activity; F:starch alpha-glucosidase activit…	-
C263R099	vhsv-induced protein	1.61012	1.84954	49	6.9e-171	0.7073	1	F:protein binding	-
C061R006	sterile alpha motif domain-containing protein 9-like	1.60993	1.8054	50	0	0.6742	-	-	-
C007R067	zinc finger protein 135-like	1.60919	2.06313	50	4.8e-122	0.743	4	F:nucleic acid binding; F:transcription factor activity, sequence-specific DNA binding; F:metal ion binding; P:regulation of transcription, DNA-templated	-
C191R161	cystatin-b-like	1.60882	1.98206	50	4.9e-60	0.7848	6	C:membrane-bounded organelle; C:extracellular region part; C:intracellular part; F:cysteine-type endopeptidase inhibitor activity; F:binding; P:negative regulation of endopeptidase activity	-
C194R099	39s ribosomal protein mitochondrial	1.60882	1.7652	50	7.2e-144	0.8194	5	C:mitochondrial inner membrane; C:mitochondrial large ribosomal subunit; F:structural constituent of ribosome; F:poly(A) RNA binding; P:translation	-
C210R163	e3 sumo-protein ligase partial	1.6077	1.30692	50	4e-58	0.932	7	C:intracellular; F:peptidyl-prolyl cis-trans isomerase activity; F:zinc ion binding; F:ligase activity; P:protein peptidyl-prolyl isomerization; P:protein folding; P:intracellular transport	-
C171R141	b-cell receptor cd22	1.60752	1.36478	50	2.6e-173	0.7412	2	F:catalytic activity; P:metabolic process	-
C083R119	e3 ubiquitin-protein ligase fancl	1.60659	1.63732	50	0	0.8938	9	C:Fanconi anaemia nuclear complex; F:protein serine/threonine kinase activity; F:ubiquitin-protein transferase activity; F:ATP binding; F:zinc ion binding; P:DNA repair; P:protein phosphorylation; P:protein ubiquitination; P:oocyte development	-
C156R079	ccr4-not transcription complex subunit 11	1.6064	1.997	50	0	0.948	9	C:nucleus; C:cytosol; C:CCR4-NOT complex; F:protein binding; P:nuclear-transcribed mRNA poly(A) tail shortening; P:regulation of transcription, DNA-templated; P:regulation of translation; P:cell proliferation; P:gene silencing by RNA	-
C226R145	proteasome subunit alpha type-6	1.60603	1.46595	50	1.5e-179	0.9158	41	C:cytoplasmic mRNA processing body; C:nucleoplasm; C:cytosol; C:polysome; C:nuclear matrix; C:proteasome core complex, alpha-subunit complex; C:sarcomere; C:extracellular exosome; F:RNA binding; F:threonine-type endopeptidase activity; F:purine ribonucleoside triphosphate binding; F:NF-kappaB binding; P:mitotic S phase; P:mitotic anaphase; P:activation of MAPKK activity; P:protein polyubiquitinat…	-
C223R099	acidic mammalian chitinase-like	1.60585	-	50	0	0.681	5	C:extracellular region; F:chitinase activity; F:chitin binding; P:carbohydrate metabolic process; P:chitin catabolic process	-
C015R106	ribonuclease h2 subunit a	1.60566	1.68607	50	6.9e-159	0.903	7	C:ribonuclease H2 complex; F:RNA binding; F:RNA-DNA hybrid ribonuclease activity; F:bidentate ribonuclease III activity; P:mismatch repair; P:DNA replication, removal of RNA primer; P:RNA phosphodiester bond hydrolysis, endonucleolytic	-
C038R087	daz-associated protein 2 isoform x1	1.60547	1.62338	50	1e-102	0.8144	2	C:transcription factor complex; F:WW domain binding	-
C164R117	---NA---	1.60492	-	0	-	-	-	-	-
C079R059	collagen triple helix repeat family partial	1.60455	1.36446	50	8.2e-130	0.4332	1	F:binding	-
C062R129	inhibitor of growth protein 5	1.60381	-	50	3.6e-113	0.9068	10	C:MOZ/MORF histone acetyltransferase complex; F:chromatin binding; F:zinc ion binding; F:methylated histone binding; P:DNA replication; P:negative regulation of cell proliferation; P:histone H3 acetylation; P:positive regulation of transcription, DNA-templated; P:negative regulation of growth; P:positive regulation of apoptotic signaling pathway	-
C253R080	fish virus induced trim protein	1.60307	1.63694	50	2.2e-156	0.7894	3	C:intracellular; F:protein binding; F:zinc ion binding	-
C011R064	heat shock 70 kda protein 4-like	1.60251	1.74452	50	2.2e-132	0.9542	1	F:ATP binding	-
C231R071	sphingomyelin phosphodiesterase	1.60251	1.6814	50	1.1e-91	0.6558	3	F:hydrolase activity; P:sphingolipid metabolic process; P:cellular amide metabolic process	-
C245R046	mucosa-associated lymphoid tissue lymphoma translocation protein 1-like	1.60214	1.49399	50	0	0.6948	2	F:cysteine-type endopeptidase activity; P:proteolysis	-
C215R121	ceramide kinase-like protein	1.60214	-	50	8.5e-25	0.797	9	C:nucleolus; C:endoplasmic reticulum; C:Golgi apparatus; C:cytosol; F:kinase activity; P:retina layer formation; P:phosphorylation; P:photoreceptor cell development; P:negative regulation of oxidative stress-induced intrinsic apoptotic signaling pathway	-
C043R007	phosphatidate cytidylyltransferase 2	1.60195	1.33268	50	4.2e-152	0.8774	11	C:mitochondrial inner membrane; C:endoplasmic reticulum membrane; C:integral component of membrane; F:phosphatidate cytidylyltransferase activity; P:angiogenesis; P:phosphatidylglycerol biosynthetic process; P:phototransduction; P:CDP-diacylglycerol biosynthetic process; P:glycosylation; P:positive regulation of ERK1 and ERK2 cascade; P:positive regulation of vascular endothelial growth factor si…	-
C212R001	vascular endothelial growth factor receptor 2-like	1.60158	1.62057	35	1.8e-151	0.6691	1	F:protein binding	-
C069R093	---NA---	1.6014	1.46088	0	-	-	-	-	-
C169R089	interferon regulatory factor 8	1.60103	-	50	0	0.766	9	F:regulatory region DNA binding; F:transcription factor activity, sequence-specific DNA binding; F:protein binding; P:regulation of transcription, DNA-templated; P:response to bacterium; P:microglia development; P:regulation of macrophage differentiation; P:regulation of neutrophil differentiation; P:positive regulation of biological process	-
C168R113	protein nlrc3-like	1.60011	-	50	2.3e-86	0.9176	1	F:ATP binding	-
C009R055	placenta-specific gene 8	1.59974	1.86305	50	2.9e-60	0.7136	3	P:pronephric glomerulus morphogenesis; P:embryonic viscerocranium morphogenesis; P:nephron tubule morphogenesis	-
C137R072	---NA---	1.59937	2.0679	0	-	-	-	-	-
C074R091	---NA---	1.59937	-	0	-	-	-	-	-
C119R072	---NA---	1.59918	1.60307	0	-	-	-	-	-
C048R165	vascular endothelial growth factor receptor 2-like	1.59863	1.81567	23	1.4e-47	0.7196	-	-	-
C156R022	fish virus induced trim protein	1.59863	1.32302	50	8.3e-147	0.7472	3	C:intracellular; F:protein binding; F:zinc ion binding	-
C233R008	protein nlrc3-like	1.59789	1.52891	50	0	0.7738	1	F:ATP binding	-
C191R128	ras-related protein rab-7a	1.5977	1.64832	50	3.4e-129	0.9742	26	C:lysosome; C:late endosome; C:vacuolar membrane; C:Golgi apparatus; C:retromer complex; C:pre-autophagosomal structure membrane; C:phagocytic vesicle; C:extracellular exosome; F:GTPase activity; F:GTP binding; F:GDP binding; P:protein targeting to lysosome; P:nucleocytoplasmic transport; P:epidermal growth factor catabolic process; P:endosome to lysosome transport; P:viral release from host cell…	-
C145R053	hemicentin-2-like isoform x2	1.59604	2.00208	34	1.6e-66	0.4821	1	F:protein binding	-
C087R087	sodium- and chloride-dependent taurine transporter-like	1.59604	1.65845	50	0	0.9526	6	C:integral component of plasma membrane; F:neurotransmitter:sodium symporter activity; F:taurine:sodium symporter activity; P:amino acid transmembrane transport; P:neurotransmitter transport; P:taurine transport	-
C075R126	dual specificity mitogen-activated protein kinase kinase 4-like isoform x2	1.59586	1.59992	50	6.5e-36	0.9754	3	F:protein serine/threonine kinase activity; F:ATP binding; P:protein phosphorylation	-
C047R107	tyrosine-protein kinase lck	1.59512	1.70665	50	0	0.9374	54	C:pericentriolar material; C:immunological synapse; C:cytosol; C:cell-cell junction; C:endocytic vesicle; C:extrinsic component of cytoplasmic side of plasma membrane; C:membrane raft; C:extracellular exosome; F:glycoprotein binding; F:non-membrane spanning protein tyrosine kinase activity; F:protein serine/threonine phosphatase activity; F:ATP binding; F:protein C-terminus binding; F:protein kin…	-
C219R089	folliculin	1.59457	1.53865	50	0	0.8592	32	C:nucleus; C:cytoplasm; C:plasma membrane; C:midbody; C:cell-cell contact zone; F:protein complex binding; P:negative regulation of transcription from RNA polymerase II promoter; P:in utero embryonic development; P:positive regulation of protein phosphorylation; P:cell-cell junction assembly; P:negative regulation of cell growth; P:negative regulation of cell migration; P:positive regulation of t…	-
C261R030	cd209 antigen-like	1.59457	-	50	4.9e-42	0.6688	2	F:carbohydrate binding; P:integrin-mediated signaling pathway	-
C204R167	probable e3 ubiquitin-protein ligase trim8	1.59438	-	50	3.8e-72	0.7414	6	C:nucleus; F:zinc ion binding; P:regulation of gene expression; P:positive regulation of cellular process; P:negative regulation of viral life cycle; P:regulation of RNA biosynthetic process	-
C243R155	corepressor interacting with rbpj 1	1.5942	1.54221	50	1.9e-130	0.9148	11	C:histone deacetylase complex; C:cytoplasm; C:microtubule organizing center; C:nuclear speck; F:transcription factor activity, RNA polymerase II distal enhancer sequence-specific binding; F:transcription corepressor activity; F:protein binding; P:regulation of transcription from RNA polymerase II promoter; P:mRNA processing; P:RNA splicing; P:negative regulation of transcription, DNA-templated	-
C025R152	protein nlrc3-like	1.59365	-	50	2.6e-145	0.6048	2	F:ATP binding; F:nucleotide binding	-
C189R150	calcium-binding and coiled-coil domain-containing protein 2	1.59181	1.80417	50	0	0.624	6	C:perinuclear region of cytoplasm; C:cytoplasm; C:intracellular membrane-bounded organelle; P:response to interferon-gamma; C:membrane; F:protein homodimerization activity	-
C175R087	fish virus induced trim protein	1.59089	1.57371	50	3.7e-85	0.6924	2	F:protein binding; F:zinc ion binding	-
C194R028	membrane-associated tyrosine- and threonine-specific cdc2-inhibitory kinase	1.59089	1.4466	50	0	0.6986	14	C:nucleoplasm; C:endoplasmic reticulum; C:Golgi apparatus; C:cytosol; C:membrane; F:protein serine/threonine kinase activity; F:protein binding; F:ATP binding; P:cell cycle checkpoint; P:regulation of cyclin-dependent protein serine/threonine kinase activity; P:G1/S transition of mitotic cell cycle; P:G2/M transition of mitotic cell cycle; P:regulation of mitotic nuclear division; P:negative regu…	-
C090R044	dipeptidyl peptidase 9 isoform x1	1.59052	1.65424	50	0	0.9256	3	C:membrane; F:serine-type peptidase activity; P:proteolysis	-
C216R040	lysophosphatidic acid phosphatase type 6	1.58979	1.29924	50	0	0.7898	2	F:acid phosphatase activity; P:protein dephosphorylation	-
C093R075	e3 ubiquitin-protein ligase dtx3l-like	1.58979	-	50	1.9e-86	0.7754	7	C:nucleus; F:zinc ion binding; P:cellular response to DNA damage stimulus; P:primary metabolic process; P:cellular macromolecule metabolic process; P:single-organism metabolic process; P:single-organism cellular process	-
C036R077	dipeptidyl peptidase 1	1.5896	1.61758	50	1.4e-39	0.5854	11	C:extracellular space; C:membrane; C:intracellular membrane-bounded organelle; C:cytoplasmic part; C:extracellular exosome; F:protein binding; F:cysteine-type peptidase activity; P:proteolysis; P:immune response; P:single-organism cellular process; P:positive regulation of cellular process	-
C254R121	---NA---	1.58905	2.05457	0	-	-	-	-	-
C203R105	disintegrin and metalloproteinase domain-containing protein 9	1.58832	1.44727	50	0	0.8022	32	C:extracellular space; C:focal adhesion; C:intrinsic component of external side of plasma membrane; C:extracellular exosome; F:metalloendopeptidase activity; F:protein kinase C binding; F:integrin binding; F:collagen binding; F:zinc ion binding; F:SH3 domain binding; F:laminin binding; P:activation of MAPKK activity; P:cell-matrix adhesion; P:transforming growth factor beta receptor signaling pat…	-
C125R065	zinc phosphodiesterase elac protein 1	1.58758	-	50	0	0.7446	2	F:3'-tRNA processing endoribonuclease activity; P:tRNA 3'-trailer cleavage, endonucleolytic	-
C127R148	e3 ubiquitin-protein ligase trim21-like	1.58703	1.8594	50	3.5e-81	0.7898	7	C:intracellular; F:ubiquitin-protein transferase activity; F:protein binding; F:zinc ion binding; F:ligase activity; P:protein ubiquitination; P:erythrocyte differentiation	-
C233R124	dnaj homolog subfamily c member 15	1.58703	1.35974	50	8.7e-87	0.863	12	C:presequence translocase-associated import motor; C:integral component of membrane; F:ATPase activator activity; F:protein binding; F:protein transporter activity; P:cellular response to starvation; P:regulation of lipid metabolic process; P:protein import into mitochondrial matrix; P:negative regulation of protein complex assembly; P:positive regulation of ATPase activity; P:pronephros developm…	-
C220R036	nuclear factor nf-kappa-b p100 subunit isoform x1	1.58703	-	50	0	0.8118	14	C:nucleoplasm; C:cytosol; C:I-kappaB/NF-kappaB complex; F:RNA polymerase II regulatory region sequence-specific DNA binding; F:RNA polymerase II transcription factor activity, sequence-specific DNA binding; F:chromatin binding; F:protein binding; P:negative regulation of transcription from RNA polymerase II promoter; P:inflammatory response; P:I-kappaB kinase/NF-kappaB signaling; P:response to cy…	-
C216R093	biotinidase-like	1.58685	-	50	0	0.7314	4	C:extracellular region; F:hydrolase activity, acting on carbon-nitrogen (but not peptide) bonds, in linear amides; P:nitrogen compound metabolic process; P:single-organism process	-
C070R029	protein transport protein sec24d	1.58593	1.60585	50	7.6e-117	0.8544	7	C:COPII vesicle coat; F:zinc ion binding; P:intracellular protein transport; P:ER to Golgi vesicle-mediated transport; P:embryonic viscerocranium morphogenesis; P:cartilage morphogenesis; P:extracellular matrix constituent secretion	-
C016R057	tripartite motif-containing protein 16-like	1.58539	1.44526	50	7.3e-118	0.741	4	C:intracellular; F:zinc ion binding; F:ligase activity; P:metabolic process	-
C155R103	mannan-binding lectin serine protease partial	1.58337	1.95026	50	1.4e-108	0.8502	9	C:extracellular space; F:serine-type endopeptidase activity; F:calcium ion binding; F:carbohydrate binding; F:protein homodimerization activity; F:calcium-dependent protein binding; P:neural crest cell migration; P:complement activation, lectin pathway; P:negative regulation of complement activation	-
C114R061	---NA---	1.58301	1.4945	0	-	-	-	-	-
C030R137	---NA---	1.58227	1.53919	0	-	-	-	-	-
C141R168	poly(adp-ribose) glycohydrolase-like	1.58191	1.32134	50	0	0.6628	3	C:intracellular part; F:poly(ADP-ribose) glycohydrolase activity; P:carbohydrate metabolic process	-
C115R047	activator of 90 kda heat shock protein atpase homolog 1-like	1.58173	1.82851	50	0	0.8468	7	C:cytoplasm; C:extracellular exosome; F:ATPase activator activity; F:chaperone binding; P:response to stress; P:positive regulation of ATPase activity; P:embryonic neurocranium morphogenesis	-
C098R074	interferon-induced 35 kda protein	1.58063	1.47427	50	0	0.6956	3	C:intracellular organelle; F:nucleotide binding; F:nucleic acid binding	-
C075R114	interleukin-10 receptor subunit beta-like	1.58027	2.0305	50	0	0.5408	7	C:membrane; C:cytoplasmic part; F:interferon receptor activity; F:protein binding; P:immune system process; P:cytokine-mediated signaling pathway; P:positive regulation of biological process	-
C008R142	phosphatidylinositol -bisphosphate 3-kinase catalytic subunit delta isoform	1.5799	1.65941	50	5.7e-167	0.932	22	C:cytoplasm; C:plasma membrane; C:phosphatidylinositol 3-kinase complex; F:ATP binding; F:1-phosphatidylinositol-3-kinase activity; F:1-phosphatidylinositol-4-phosphate 3-kinase activity; F:phosphatidylinositol-4,5-bisphosphate 3-kinase activity; P:B cell homeostasis; P:adaptive immune response; P:protein phosphorylation; P:inflammatory response; P:cell surface receptor signaling pathway; P:posit…	-
C212R009	---NA---	1.57954	1.32731	0	-	-	-	-	-
C131R155	signal transducer and activator of transcription 4	1.57954	-	50	1.1e-164	0.871	7	C:nucleus; C:cytoplasm; F:DNA binding; F:transcription factor activity, sequence-specific DNA binding; F:signal transducer activity; P:cytokine-mediated signaling pathway; P:positive regulation of transcription from RNA polymerase II promoter	-
C067R010	occludin-like	1.57826	-	50	4.9e-95	0.8412	5	C:bicellular tight junction; C:integral component of membrane; F:DNA binding; P:regulation of DNA-templated transcription, elongation; P:bicellular tight junction assembly	-
C038R052	serine threonine-protein kinase endoribonuclease ire1-like	1.57534	1.69564	50	9.9e-74	0.7016	6	F:ribonuclease activity; F:protein kinase activity; F:ATP binding; P:mRNA processing; P:protein phosphorylation; P:RNA phosphodiester bond hydrolysis	-
C188R033	zinc finger protein 263-like isoform x2	1.5748	1.86219	50	1.7e-93	0.6902	2	F:nucleic acid binding; F:metal ion binding	-
C029R114	ribonuclease p protein subunit p25-like protein	1.57462	1.61533	50	5.4e-140	0.6894	1	F:nucleic acid binding	-
C212R147	poly [ADP-ribose] polymerase 4-like	1.57462	1.477	50	1.7e-180	0.7274	2	F:NAD+ ADP-ribosyltransferase activity; P:protein ADP-ribosylation	-
C168R121	inorganic pyrophosphatase-like	1.57425	1.60659	50	0	0.9094	4	C:cytoplasm; F:magnesium ion binding; F:inorganic diphosphatase activity; P:phosphate-containing compound metabolic process	-
C241R109	---NA---	1.57371	1.62263	0	-	-	-	-	-
C093R051	protein tprxl	1.57316	1.47291	17	9.9e-15	0.8712	1	F:metal ion binding	-
C138R024	ben domain-containing protein 3	1.57262	1.61105	50	0	0.8842	5	C:extracellular region; C:nuclear heterochromatin; F:growth factor activity; P:negative regulation of transcription from RNA polymerase II promoter; P:growth	-
C180R072	sulfhydryl oxidase 1	1.57262	-	50	3.2e-51	0.7918	11	C:extracellular space; C:endoplasmic reticulum; C:integral component of Golgi membrane; C:intercellular bridge; C:extracellular exosome; F:protein disulfide isomerase activity; F:flavin-linked sulfhydryl oxidase activity; P:protein folding; P:negative regulation of macroautophagy; P:cell redox homeostasis; P:oxidation-reduction process	-
C164R024	mpv17-like protein	1.57207	1.59034	50	2.2e-80	0.7914	1	C:integral component of membrane	-
C255R145	dna topoisomerase 1	1.57189	1.5351	50	1.1e-47	0.676	18	C:cytoplasmic mRNA processing body; C:nucleoplasm; C:nucleolus; C:replication fork protection complex; C:perikaryon; F:core promoter sequence-specific DNA binding; F:chromatin binding; F:DNA topoisomerase type I activity; F:DNA topoisomerase type II (ATP-hydrolyzing) activity; F:protein binding; F:poly(A) RNA binding; P:DNA replication; P:DNA topological change; P:chromatin remodeling; P:chromoso…	-
C029R089	bifunctional purine biosynthesis protein purh	1.57153	1.75341	50	0	0.911	17	C:mitochondrion; C:cytosol; C:membrane; C:extracellular exosome; F:IMP cyclohydrolase activity; F:phosphoribosylaminoimidazolecarboxamide formyltransferase activity; F:protein homodimerization activity; P:brainstem development; P:purine nucleobase metabolic process; P:'de novo' IMP biosynthetic process; P:nucleoside metabolic process; P:response to inorganic substance; P:cerebellum development; P…	-
C026R101	dnaj homolog subfamily a member 4	1.57116	1.81064	50	7.1e-97	0.8728	30	C:ubiquitin ligase complex; C:nucleus; C:mitochondrion; C:endoplasmic reticulum; C:cytosol; C:membrane; C:perinuclear region of cytoplasm; C:extracellular exosome; F:G-protein coupled receptor binding; F:ATP binding; F:Hsp70 protein binding; F:ubiquitin protein ligase binding; F:metal ion binding; F:low-density lipoprotein particle receptor binding; F:unfolded protein binding; F:chaperone binding…	-
C197R163	nadh dehydrogenase	1.5708	1.72071	50	1e-122	0.8882	5	C:mitochondrial respiratory chain complex I; C:mitochondrial intermembrane space; F:protein complex binding; P:transport; P:oxidation-reduction process	-
C159R161	e3 ubiquitin-protein ligase ttc3	1.57044	1.34754	50	6.2e-80	0.6326	2	F:protein binding; F:zinc ion binding	-
C017R119	unnamed protein product	1.57044	-	4	5.8e-07	0.7725	2	F:metalloendopeptidase activity; P:peptide hormone processing	-
C020R170	threonine--trna cytoplasmic	1.56989	1.71099	50	2.7e-74	0.9366	7	C:cytosol; C:actin cytoskeleton; C:extracellular exosome; F:threonine-tRNA ligase activity; F:ATP binding; F:protein homodimerization activity; P:threonyl-tRNA aminoacylation	-
C113R071	arginine--trna cytoplasmic	1.56989	1.52151	50	0	0.9122	7	C:nucleoplasm; C:mitochondrion; C:membrane; C:extracellular exosome; F:arginine-tRNA ligase activity; F:ATP binding; P:arginyl-tRNA aminoacylation	-
C188R138	helicase with zinc finger domain 2	1.56971	1.50908	50	0	0.7034	4	F:nucleic acid binding; F:ATP binding; F:zinc ion binding; F:ligand-dependent nuclear receptor transcription coactivator activity	-
C102R155	---NA---	1.56899	-	0	-	-	-	-	-
C218R043	acetyl-coenzyme a cytoplasmic isoform x2	1.56772	1.75585	50	3.8e-79	0.909	4	F:acetate-CoA ligase activity; F:ATP binding; F:AMP binding; P:acetyl-CoA biosynthetic process from acetate	-
C257R057	---NA---	1.56609	1.58264	0	-	-	-	-	-
C147R007	---NA---	1.56591	1.42158	0	-	-	-	-	-
C222R083	e3 ubiquitin-protein ligase trim39-like	1.56519	1.71554	50	4.2e-154	0.7782	6	C:cytoplasm; F:protein binding; F:zinc ion binding; F:ligase activity; F:ubiquitin protein ligase activity; P:protein ubiquitination	-
C067R068	---NA---	1.56519	1.56591	0	-	-	-	-	-
C149R061	---NA---	1.56519	1.38703	0	-	-	-	-	-
C079R020	zinc finger protein 40 isoform x1	1.565	1.50403	50	3.4e-18	0.6232	4	F:nucleotide binding; F:kinase activity; P:cellular protein modification process; P:phosphorylation	-
C063R072	gdp-man:man c -pp-dol alpha- -mannosyltransferase-like	1.565	-	50	0	0.6006	6	P:biosynthetic process; F:transferase activity; C:integral component of membrane; C:membrane; F:GDP-Man:Man3GlcNAc2-PP-Dol alpha-1,2-mannosyltransferase activity; F:transferase activity, transferring glycosyl groups	-
C253R065	ras-related protein rab-7a	1.56392	1.71574	50	1.4e-142	0.9848	31	C:lysosomal membrane; C:late endosome; C:Golgi apparatus; C:phagocytic vesicle membrane; C:retromer complex; C:pre-autophagosomal structure membrane; C:melanosome; C:terminal bouton; C:extracellular exosome; C:alveolar lamellar body; F:GTPase activity; F:GTP binding; F:GDP binding; F:Rac GTPase binding; P:protein targeting to lysosome; P:nucleocytoplasmic transport; P:epidermal growth factor cata…	-
C199R035	myotubularin-related protein 9-like isoform x1	1.56392	1.64566	50	7.9e-129	0.8242	3	F:catalytic activity; F:coenzyme binding; P:metabolic process	-
C219R084	protein lifeguard 1	1.56338	1.58539	50	1.7e-117	0.7338	1	C:integral component of membrane	-
C001R076	protein lifeguard 4	1.56284	1.65233	50	3.5e-79	0.8426	4	C:Golgi stack; C:integral component of membrane; P:negative regulation of apoptotic process; P:regulation of calcium-mediated signaling	-
C256R140	formin-like protein 1	1.56266	1.5515	50	0	0.8566	4	F:actin binding; F:Rho GTPase binding; P:regulation of cell shape; P:actin cytoskeleton organization	-
C096R047	thyrotroph embryonic factor-like isoform x1	1.56121	1.44577	50	0	0.7942	6	C:nucleus; F:transcription factor activity, sequence-specific DNA binding; F:sequence-specific DNA binding; P:regulation of transcription from RNA polymerase II promoter; P:positive regulation of transcription, DNA-templated; P:cellular response to light stimulus	-
C124R077	kinase d-interacting substrate of 220 kda isoform x1	1.56085	2.10575	50	0	0.7964	6	C:late endosome; C:membrane; F:protein kinase regulator activity; F:PDZ domain binding; P:nerve growth factor signaling pathway; P:regulation of protein kinase activity	-
C237R116	transcriptional activator protein pur-alpha-like	1.56067	1.51817	50	1e-110	0.9254	18	C:DNA replication factor A complex; C:cytoplasm; C:dendrite; C:neuronal cell body; F:translation repressor activity, nucleic acid binding; F:double-stranded telomeric DNA binding; F:single-stranded DNA binding; F:transcription factor activity, sequence-specific DNA binding; F:transcription factor binding; F:purine-rich negative regulatory element binding; F:poly(A) RNA binding; F:SMAD binding; P:…	-
C167R121	zinc finger protein 706	1.55851	1.52767	50	1.9e-27	0.9024	1	P:biological_process	-
C088R059	microfibrillar-associated protein 1	1.55833	1.75443	50	5e-148	0.9452	4	C:microfibril; F:protein binding; F:poly(A) RNA binding; P:extracellular matrix organization	-
C021R049	---NA---	1.55833	1.59881	0	-	-	-	-	-
C087R076	---NA---	1.55815	1.64338	0	-	-	-	-	-
C148R038	fch domain only protein 1-like	1.55815	-	50	0	0.8324	4	C:plasma membrane; P:dorsal/ventral pattern formation; P:BMP signaling pathway; P:clathrin-mediated endocytosis	-
C188R088	optineurin	1.55761	1.69702	50	0	0.7144	9	C:nucleus; C:Golgi apparatus; C:cytoplasmic membrane-bounded vesicle; F:K63-linked polyubiquitin binding; P:protein targeting to Golgi; P:axonogenesis; P:regulation of I-kappaB kinase/NF-kappaB signaling; P:vesicle localization; P:Golgi ribbon formation	-
C232R024	---NA---	1.55743	-	0	-	-	-	-	-
C071R117	ras-related protein rab-7a	1.55707	1.64243	50	1.4e-142	0.9848	31	C:lysosomal membrane; C:late endosome; C:Golgi apparatus; C:phagocytic vesicle membrane; C:retromer complex; C:pre-autophagosomal structure membrane; C:melanosome; C:terminal bouton; C:extracellular exosome; C:alveolar lamellar body; F:GTPase activity; F:GTP binding; F:GDP binding; F:Rac GTPase binding; P:protein targeting to lysosome; P:nucleocytoplasmic transport; P:epidermal growth factor cata…	-
C229R057	---NA---	1.55671	1.67966	0	-	-	-	-	-
C217R055	caspase-8-like	1.55635	1.33422	50	0	0.6252	10	C:cytoplasm; C:intracellular organelle; C:protein complex; F:cysteine-type endopeptidase activity; F:protein binding; P:induction by virus of host apoptotic process; P:regulation of cysteine-type endopeptidase activity involved in apoptotic process; P:positive regulation of proteolysis; P:system development; P:extrinsic apoptotic signaling pathway	-
C052R128	eukaryotic translation initiation factor 4e	1.55545	1.50525	50	3.5e-131	0.9296	29	C:cytoplasmic mRNA processing body; C:cytosol; C:mRNA cap binding complex; C:cytoplasmic stress granule; C:eukaryotic translation initiation factor 4F complex; C:RISC complex; C:chromatoid body; C:perinuclear region of cytoplasm; C:extracellular exosome; F:RNA cap binding; F:translation initiation factor activity; F:copper ion binding; F:enzyme binding; F:eukaryotic initiation factor 4G binding; …	-
C245R016	protein c19orf12 homolog	1.55545	1.32945	50	9e-51	0.8862	7	C:endoplasmic reticulum membrane; C:integral component of membrane; C:mitochondrial membrane; F:methyltransferase activity; F:oxidoreductase activity, acting on paired donors, with incorporation or reduction of molecular oxygen, 2-oxoglutarate as one donor, and incorporation of one atom each of oxygen into both donors; P:methylation; P:oxidation-reduction process	-
C019R120	---NA---	1.55509	-	0	-	-	-	-	-
C236R136	peroxisomal biogenesis factor 3	1.55491	1.55527	50	2.7e-115	0.903	15	C:nucleoplasm; C:integral component of peroxisomal membrane; C:endoplasmic reticulum; C:cytosol; C:protein-lipid complex; C:protein complex; F:lipid binding; F:amino acid transmembrane transporter activity; F:protein dimerization activity; P:positive regulation of defense response to virus by host; P:amino acid transmembrane transport; P:peroxisome membrane biogenesis; P:protein import into perox…	-
C042R120	e3 ubiquitin-protein ligase rnf31	1.55473	1.66497	50	0	0.703	4	C:LUBAC complex; F:ubiquitin-protein transferase activity; F:zinc ion binding; P:protein ubiquitination	-
C041R155	myotubularin isoform x1	1.55455	1.59034	50	0	0.895	25	C:ruffle; C:late endosome; C:plasma membrane; C:filopodium; C:I band; C:extracellular exosome; F:phosphatidylinositol-3-phosphatase activity; F:protein tyrosine phosphatase activity; F:intermediate filament binding; F:phosphatidylinositol binding; F:phosphatidylinositol-3,5-bisphosphate 3-phosphatase activity; P:somatic muscle development; P:neuromuscular junction development; P:locomotory behavi…	-
C156R065	macrosialin	1.55348	2.03496	50	7.1e-115	0.6402	1	C:membrane	-
C144R030	serum amyloid p-component-like	1.5533	1.82935	50	4.5e-85	0.548	-	-	-
C025R137	spry domain-containing socs box protein 4-like	1.55312	1.69466	50	4.4e-119	0.9248	3	C:intracellular; P:protein ubiquitination; P:intracellular signal transduction	-
C205R049	biogenesis of lysosome-related organelles complex 1 subunit 1	1.55294	1.58246	50	1.1e-65	0.9442	20	C:extracellular space; C:mitochondrial intermembrane space; C:mitochondrial matrix; C:lysosomal membrane; C:early endosome; C:BLOC-1 complex; C:extracellular exosome; F:protein binding; P:post-Golgi vesicle-mediated transport; P:anterograde axon cargo transport; P:aerobic respiration; P:endosomal transport; P:peptidyl-lysine acetylation; P:neuron projection development; P:melanosome organization;…	-
C215R113	---NA---	1.55258	1.75078	0	-	-	-	-	-
C118R082	mob kinase activator 3a	1.5515	1.85897	50	1.9e-155	0.9534	4	C:intracellular; F:kinase activity; F:metal ion binding; P:phosphorylation	-
C120R137	dnaj homolog subfamily a member 4	1.55097	1.89365	50	5.2e-174	0.876	10	C:cytosol; C:membrane; F:ATP binding; F:heat shock protein binding; F:metal ion binding; F:unfolded protein binding; F:chaperone binding; P:response to heat; P:protein refolding; P:negative regulation of inclusion body assembly	-
C029R087	protein nlrc3-like	1.55079	-	50	0	0.7996	1	F:ATP binding	-
C239R030	nuclear factor nf-kappa-b p100 subunit isoform x1	1.55043	1.33963	50	0	0.7582	14	C:nucleoplasm; C:cytosol; C:I-kappaB/NF-kappaB complex; F:RNA polymerase II regulatory region sequence-specific DNA binding; F:RNA polymerase II transcription factor activity, sequence-specific DNA binding; F:chromatin binding; F:protein binding; P:negative regulation of transcription from RNA polymerase II promoter; P:inflammatory response; P:I-kappaB kinase/NF-kappaB signaling; P:response to cy…	-
C036R107	tax1-binding protein 1 homolog b-like	1.55043	-	50	0	0.8644	2	F:metal ion binding; P:apoptotic process	-
C246R168	bifunctional udp-n-acetylglucosamine transferase and deubiquitinase alg13	1.55025	-	50	1.3e-100	0.864	3	F:transferase activity; P:metabolic process; P:dorsal/ventral pattern formation	-
C004R132	cd82 antigen	1.54989	1.44844	50	3.1e-165	0.7926	1	C:integral component of membrane	-
C026R123	poly [ADP-ribose] polymerase 14-like isoform X2	1.54953	1.49917	50	1.3e-162	0.6888	5	F:NAD+ ADP-ribosyltransferase activity; F:organic cyclic compound binding; F:heterocyclic compound binding; P:metabolic process; P:regulation of apoptotic process	-
C019R126	syntaxin-5 isoform x1	1.54935	1.75159	50	3.7e-31	0.9798	9	C:Golgi membrane; C:integral component of membrane; C:SNARE complex; F:SNARE binding; F:SNAP receptor activity; P:intracellular protein transport; P:ER to Golgi vesicle-mediated transport; P:vesicle fusion; P:vesicle docking	-
C209R035	protein transport protein sec24a	1.549	1.75767	50	7.9e-87	0.9292	17	C:Golgi membrane; C:endoplasmic reticulum membrane; C:cytosol; C:COPII vesicle coat; C:perinuclear region of cytoplasm; F:protein binding; F:zinc ion binding; P:antigen processing and presentation of peptide antigen via MHC class I; P:intracellular protein transport; P:protein N-linked glycosylation via asparagine; P:antigen processing and presentation of exogenous peptide antigen via MHC class I…	-
C093R028	zinc finger protein 395-like	1.549	-	50	1.1e-81	0.6708	1	F:metal ion binding	-
C058R077	probable ribonuclease zc3h12d	1.54882	1.39991	50	0	0.6886	14	C:nucleoplasm; C:cytoplasm; C:plasma membrane; F:metal ion binding; P:positive regulation of autophagy; P:positive regulation of gene expression; P:positive regulation of lipid storage; P:negative regulation of NF-kappaB transcription factor activity; P:negative regulation of interleukin-6 production; P:negative regulation of tumor necrosis factor production; P:negative regulation of nitric oxide…	-
C203R012	cell cycle control protein 50a-like	1.54882	1.34552	50	0	0.8872	2	C:integral component of membrane; P:phospholipid transport	-
C086R096	desumoylating isopeptidase 1	1.54882	-	50	2.6e-96	0.8776	1	F:identical protein binding	-
C026R036	cd83 antigen	1.54739	1.63978	50	9.6e-145	0.7126	3	C:cell surface; P:T cell activation involved in immune response; P:dendritic cell antigen processing and presentation	-
C089R031	ubiquitin-protein ligase e3c	1.54667	1.59291	50	4.8e-177	0.9606	15	C:proteasome complex; C:nucleus; C:cytoplasm; F:protein binding; F:UDP-N-acetylmuramoylalanyl-D-glutamyl-2,6-diaminopimelate-D-alanyl-D-alanine ligase activity; F:ribosomal S6-glutamic acid ligase activity; F:coenzyme F420-0 gamma-glutamyl ligase activity; F:coenzyme F420-2 alpha-glutamyl ligase activity; F:ubiquitin protein ligase activity; F:protein-glycine ligase activity, initiating; F:protei…	-
C155R039	b9 domain-containing protein 2	1.54667	1.52644	50	1.1e-121	0.9054	10	C:cytoplasm; C:centrosome; C:membrane; C:TCTN-B9D complex; C:ciliary basal body; F:gamma-tubulin binding; P:establishment of planar polarity; P:establishment or maintenance of cell polarity; P:opsin transport; P:cilium assembly	-
C098R075	proline-rich nuclear receptor coactivator 1	1.54649	1.6103	50	6.8e-110	0.5786	-	-	-
C223R073	growth factor receptor-bound protein 2	1.54631	1.52503	50	3.2e-145	0.9728	48	C:nucleoplasm; C:nucleolus; C:endosome; C:Golgi apparatus; C:cytosol; C:cell-cell junction; C:COP9 signalosome; C:vesicle membrane; C:extracellular exosome; C:Grb2-EGFR complex; F:phosphotyrosine binding; F:SH3/SH2 adaptor activity; F:epidermal growth factor receptor binding; F:neurotrophin TRKA receptor binding; F:SH3 domain binding; F:protein kinase binding; F:protein phosphatase binding; F:ide…	-
C074R108	isoaspartyl peptidase l-asparaginase-like	1.54614	1.52785	50	7.2e-173	0.779	2	F:hydrolase activity; P:metabolic process	-
C249R136	coiled-coil domain-containing protein 6	1.54596	1.64016	50	0	0.8944	4	C:cytoplasm; C:cytoskeleton; F:structural constituent of cytoskeleton; F:SH3 domain binding	-
C241R076	serine--trna cytoplasmic	1.54578	1.42537	50	0	0.9094	7	C:mitochondrion; C:extracellular exosome; F:serine-tRNA ligase activity; F:ATP binding; P:patterning of blood vessels; P:seryl-tRNA aminoacylation; P:selenocysteinyl-tRNA(Sec) biosynthetic process	-
C093R102	interferon regulatory factor 3	1.54542	1.58502	50	0	0.6886	4	C:perinuclear region of cytoplasm; F:regulatory region DNA binding; F:transcription factor activity, sequence-specific DNA binding; P:regulation of transcription, DNA-templated	-
C146R098	zinc finger bed domain-containing protein 5	1.54542	1.4323	50	7.7e-41	0.7386	1	F:nucleic acid binding	-
C084R129	fish virus induced trim protein	1.54435	1.74291	50	3.7e-85	0.6924	2	F:protein binding; F:zinc ion binding	-
C264R088	transformer-2 protein homolog alpha isoform x2	1.54417	2.63201	50	1.3e-96	0.9062	5	C:nucleolus; F:nucleotide binding; F:identical protein binding; F:poly(A) RNA binding; P:mRNA splicing, via spliceosome	-
C044R100	calcium-binding and coiled-coil domain-containing protein 2	1.54417	1.5415	50	0	0.624	6	C:perinuclear region of cytoplasm; C:cytoplasm; C:intracellular membrane-bounded organelle; P:response to interferon-gamma; C:membrane; F:protein homodimerization activity	-
C178R086	protein tex261	1.54399	1.36037	50	2.5e-135	0.9468	16	C:nucleoplasm; C:nucleolus; C:ER to Golgi transport vesicle; C:integral component of Golgi membrane; C:integral component of endoplasmic reticulum membrane; C:ribonucleoprotein complex; F:DNA binding; F:double-stranded RNA binding; F:ATP binding; F:transferase activity; F:poly(A) RNA binding; F:COPII adaptor activity; P:ER to Golgi vesicle-mediated transport; P:immune response; P:positive regulat…	-
C167R022	atp-binding cassette sub-family d member 3	1.54382	-	50	5.5e-19	0.9692	18	C:mitochondrial inner membrane; C:peroxisomal membrane; C:peroxisomal matrix; C:cytosol; C:integral component of membrane; F:long-chain fatty acid transporter activity; F:ATP binding; F:ATPase activity, coupled to transmembrane movement of substances; F:protein homodimerization activity; F:protein self-association; P:fatty acid biosynthetic process; P:fatty acid beta-oxidation; P:peroxisome organ…	-
C151R136	---NA---	1.54346	1.67075	0	-	-	-	-	-
C208R154	heat shock 70 kda protein 4	1.54328	1.81588	50	1e-150	0.8292	1	F:ATP binding	-
C033R061	poly [ADP-ribose] polymerase 14-like	1.54239	1.59162	50	0	0.6786	3	F:NAD+ ADP-ribosyltransferase activity; P:metabolic process; P:regulation of apoptotic process	-
C178R091	formin-binding protein 1-like isoform x2	1.54168	1.34786	50	0	0.838	10	C:cytoplasmic membrane-bounded vesicle; C:extracellular exosome; F:protein binding; P:membrane budding; P:membrane invagination; P:vesicle transport along actin filament; P:cilium assembly; P:positive regulation of filopodium assembly; P:clathrin-mediated endocytosis; P:membrane tubulation	-
C188R043	acylglycerol mitochondrial	1.5415	1.41014	50	0	0.8208	7	C:mitochondrial membrane; F:lipid kinase activity; F:NAD+ kinase activity; F:ATP binding; F:acylglycerol kinase activity; P:phosphorylation; P:glycerolipid metabolic process	-
C050R118	growth factor receptor-bound protein 2	1.54132	1.63864	50	3.2e-145	0.9728	48	C:nucleoplasm; C:nucleolus; C:endosome; C:Golgi apparatus; C:cytosol; C:cell-cell junction; C:COP9 signalosome; C:vesicle membrane; C:extracellular exosome; C:Grb2-EGFR complex; F:phosphotyrosine binding; F:SH3/SH2 adaptor activity; F:epidermal growth factor receptor binding; F:neurotrophin TRKA receptor binding; F:SH3 domain binding; F:protein kinase binding; F:protein phosphatase binding; F:ide…	-
C044R019	catenin beta-1	1.54114	1.34412	50	0	0.981	183	C:spindle pole; C:nucleoplasm; C:nuclear euchromatin; C:centrosome; C:cytosol; C:zonula adherens; C:fascia adherens; C:bicellular tight junction; C:focal adhesion; C:cell cortex; C:basolateral plasma membrane; C:lateral plasma membrane; C:catenin complex; C:flotillin complex; C:Z disc; C:lamellipodium; C:desmosome; C:beta-catenin destruction complex; C:microvillus membrane; C:protein-DNA complex;…	-
C154R150	interferon-induced 35 kda protein	1.54096	1.40916	50	0	0.7012	3	C:intracellular organelle; F:nucleotide binding; F:nucleic acid binding	-
C044R037	---NA---	1.54096	1.37936	0	-	-	-	-	-
C192R097	complement c1s subcomponent	1.54043	1.33099	50	0	0.607	5	C:extracellular region; F:serine-type endopeptidase activity; F:calcium ion binding; P:proteolysis; P:complement activation	-
C075R151	swi snf-related matrix-associated actin-dependent regulator of chromatin subfamily d member 3-like	1.54007	1.78633	50	1.7e-28	0.9856	3	P:heart morphogenesis; P:determination of left/right symmetry; P:cardiac muscle cell differentiation	-
C074R146	complement c1s subcomponent	1.54007	1.65653	50	0	0.607	5	C:extracellular region; F:serine-type endopeptidase activity; F:calcium ion binding; P:proteolysis; P:complement activation	-
C243R163	copine-1	1.53972	-	50	1.2e-136	0.7216	2	F:organic cyclic compound binding; F:heterocyclic compound binding	-
C031R046	---NA---	1.53954	1.68102	0	-	-	-	-	-
C264R042	---NA---	1.53901	1.67578	0	-	-	-	-	-
C228R149	---NA---	1.53901	-	0	-	-	-	-	-
C143R088	alpha beta hydrolase domain-containing protein 14b	1.53865	1.62544	50	1.4e-135	0.8254	4	C:nucleus; C:cytoplasm; F:hydrolase activity; P:metabolic process	-
C050R033	---NA---	1.53847	2.31418	0	-	-	-	-	-
C118R005	---NA---	1.53688	-	0	-	-	-	-	-
C222R063	calcium and integrin-binding protein 1	1.5367	1.51607	50	3.1e-115	0.9066	52	C:nucleoplasm; C:endoplasmic reticulum; C:Golgi apparatus; C:centrosome; C:apical plasma membrane; C:lamellipodium; C:growth cone; C:filopodium tip; C:ruffle membrane; C:sarcolemma; C:neuronal cell body; C:perinuclear region of cytoplasm; C:extracellular exosome; F:calcium ion binding; F:calcium-dependent protein kinase inhibitor activity; F:Ras GTPase binding; F:protein serine/threonine kinase i…	-
C073R162	cysteine-rich hydrophobic domain-containing protein 2	1.53634	1.88775	50	2.8e-85	0.9682	4	C:Golgi-associated vesicle; C:plasma membrane; F:protein binding; P:Golgi to plasma membrane transport	-
C113R125	legumain	1.53599	1.46815	50	0	0.8368	4	F:peptidase activity; P:proteolysis; P:axon regeneration; P:tissue regeneration	-
C039R103	trna selenocysteine 1-associated protein 1-like	1.53581	1.67617	50	9.3e-135	0.8488	5	C:nucleus; C:cytoplasm; F:nucleotide binding; F:poly(A) RNA binding; P:selenocysteine incorporation	-
C152R038	extracellular matrix protein 1-like	1.53563	-	50	5.8e-167	0.5592	2	C:extracellular space; P:regulation of cellular process	-
C093R157	diablo mitochondrial-like	1.53546	1.66921	50	2.1e-166	0.7318	2	C:mitochondrion; P:activation of cysteine-type endopeptidase activity involved in apoptotic process	-
C009R056	ras gtpase-activating-like protein iqgap2	1.53528	1.64528	50	1.6e-55	0.9694	7	C:intracellular; F:transcription factor activity, sequence-specific DNA binding; F:GTPase activator activity; F:sequence-specific DNA binding; P:regulation of transcription, DNA-templated; P:small GTPase mediated signal transduction; P:positive regulation of GTPase activity	-
C156R095	v-type proton atpase subunit e 2	1.5351	-	50	1.1e-31	0.9328	17	C:extracellular region; C:endosome membrane; C:integral component of membrane; C:phagocytic vesicle membrane; C:proton-transporting V-type ATPase, V0 domain; F:nucleic acid binding; F:proton-transporting ATPase activity, rotational mechanism; F:protein dimerization activity; P:regulation of transcription, DNA-templated; P:cellular iron ion homeostasis; P:vacuolar acidification; P:insulin receptor…	-
C185R069	headcase protein homolog	1.53475	-	50	0	0.8086	1	C:membrane	-
C104R128	star-related lipid transfer protein 3	1.53439	1.64148	50	0	0.8798	7	C:mitochondrion; C:lysosomal membrane; C:late endosome; F:cholesterol binding; F:cholesterol transporter activity; P:progesterone biosynthetic process; P:cholesterol transport	-
C246R013	tetratricopeptide repeat protein 39c-like	1.53386	-	50	1.4e-101	0.8178	3	P:otolith morphogenesis; P:cilium assembly; P:determination of heart left/right asymmetry	-
C186R034	protein	1.53315	1.55581	50	8.6e-31	0.545	1	F:catalytic activity	-
C207R162	transmembrane protein 35	1.5328	1.45213	50	9.8e-18	0.8842	3	C:peroxisomal membrane; C:integral component of membrane; C:cytoplasmic membrane-bounded vesicle	-
C237R031	4-trimethylaminobutyraldehyde dehydrogenase	1.53244	1.35613	50	0	0.917	11	C:mitochondrion; C:cytosol; C:extracellular exosome; F:betaine-aldehyde dehydrogenase activity; F:aminobutyraldehyde dehydrogenase activity; F:4-trimethylammoniobutyraldehyde dehydrogenase activity; P:cellular aldehyde metabolic process; P:carnitine metabolic process; P:glycine betaine biosynthetic process from choline; P:neurotransmitter biosynthetic process; P:oxidation-reduction process	-
C034R031	mucosa-associated lymphoid tissue lymphoma translocation protein 1-like	1.53244	-	50	0	0.6948	2	F:cysteine-type endopeptidase activity; P:proteolysis	-
C262R054	protein rft1 homolog	1.53209	1.4451	50	0	0.8736	4	C:endoplasmic reticulum membrane; C:integral component of membrane; F:lipid transporter activity; P:glycolipid translocation	-
C006R147	---NA---	1.53191	1.6696	0	-	-	-	-	-
C126R090	sec14-like protein 1	1.53191	-	50	0	0.9388	2	C:integral component of membrane; P:transport	-
C181R110	---NA---	1.53173	1.95319	0	-	-	-	-	-
C095R008	transposable element tcb1 transposase	1.53173	1.37872	50	7.7e-36	0.7022	21	C:integral component of membrane; C:SWI/SNF complex; F:DNA binding; F:monooxygenase activity; F:transmembrane receptor protein tyrosine kinase activity; F:transposase activity; F:ubiquitin-protein transferase activity; F:ATP binding; F:mechanically-gated ion channel activity; F:oxidoreductase activity, acting on paired donors, with incorporation or reduction of molecular oxygen; F:ligase activity…	-
C099R076	---NA---	1.53156	1.8665	0	-	-	-	-	-
C090R164	transmembrane protein 39a	1.53085	1.31494	50	3.4e-96	0.9406	4	C:integral component of membrane; P:positive regulation of defense response to virus by host; P:mitophagy in response to mitochondrial depolarization; P:regulation of mitophagy	-
C071R072	bromodomain-containing protein 2-like isoform x2	1.52979	1.57443	50	5.6e-87	0.8736	1	P:thrombocyte differentiation	-
C212R162	---NA---	1.52944	1.65042	0	-	-	-	-	-
C063R073	recq-mediated genome instability protein 2	1.52926	1.32363	50	8.8e-99	0.7436	4	C:mitochondrial outer membrane; C:integral component of membrane; F:DNA binding; P:regulation of cellular process	-
C170R147	daz-associated protein 1 isoform x1	1.52926	-	50	0	0.9576	2	F:nucleotide binding; F:nucleic acid binding	-
C215R045	dual specificity protein kinase clk2 isoform x1	1.52908	1.86327	50	0	0.9538	12	C:nucleoplasm; C:integral component of membrane; F:protein serine/threonine kinase activity; F:protein tyrosine kinase activity; F:ATP binding; P:response to ionizing radiation; P:protein transport; P:peptidyl-tyrosine phosphorylation; P:response to retinoic acid; P:regulation of RNA splicing; P:negative regulation of gluconeogenesis; P:protein autophosphorylation	-
C121R089	ubiquitin-conjugating enzyme e2 b	1.52908	1.52961	50	4.3e-102	0.9728	42	C:nuclear chromatin; C:XY body; C:nucleoplasm; C:replication fork; C:cytosol; C:plasma membrane; C:HULC complex; F:ATP binding; F:ligase activity; F:ubiquitin protein ligase binding; F:ubiquitin protein ligase activity; F:ubiquitin conjugating enzyme activity; P:leptotene; P:response to hypoxia; P:in utero embryonic development; P:antigen processing and presentation of peptide antigen via MHC cla…	-
C195R091	nicotinamide nicotinic acid mononucleotide adenylyltransferase 1	1.52908	1.37316	50	0	0.8028	4	F:nicotinamide-nucleotide adenylyltransferase activity; F:nicotinate-nucleotide adenylyltransferase activity; F:ATP binding; P:NAD biosynthetic process	-
C196R162	---NA---	1.5282	1.52785	0	-	-	-	-	-
C217R091	2 -cyclic-nucleotide 3 -phosphodiesterase	1.5282	1.29504	50	1.3e-120	0.7258	21	C:mitochondrial outer membrane; C:mitochondrial inner membrane; C:cytosol; C:plasma membrane; C:microvillus; C:pseudopodium; C:myelin sheath abaxonal region; C:myelin sheath adaxonal region; C:perinuclear region of cytoplasm; F:2',3'-cyclic-nucleotide 3'-phosphodiesterase activity; F:ATP binding; F:cyclic nucleotide binding; P:microtubule cytoskeleton organization; P:receptor guanylyl cyclase sig…	-
C198R164	antimicrobial peptide nk-lysin-like	1.5282	-	33	2.7e-56	0.6927	1	P:lipid metabolic process	-
C026R071	prolyl endopeptidase	1.52767	1.44911	50	0	0.8626	11	C:nucleus; C:mitochondrial matrix; C:cytosol; C:membrane; F:metalloendopeptidase activity; F:serine-type endopeptidase activity; F:protein binding; F:zinc ion binding; F:peptide binding; F:serine-type exopeptidase activity; P:protein processing	-
C160R072	tripartite motif-containing protein 35-like	1.52749	-	50	6.6e-141	0.747	3	C:intracellular; F:protein binding; F:zinc ion binding	-
C092R052	interleukin enhancer-binding factor 3-like isoform x2	1.52661	1.37856	50	2.4e-84	0.8022	2	F:RNA binding; P:spermatogenesis	-
C104R054	chromodomain-helicase-dna-binding protein 4-like isoform x1	1.52644	1.61515	50	0	0.8006	10	C:NuRD complex; F:DNA binding; F:ATP binding; F:microtubule binding; F:ATP-dependent helicase activity; F:zinc ion binding; P:chromatin organization; P:regulation of transcription, DNA-templated; P:fin regeneration; P:spindle assembly	-
C086R155	troponin fast skeletal muscle-like	1.52555	1.39926	50	5.1e-41	0.8456	19	C:nucleus; C:endosome; C:trans-Golgi network; C:troponin complex; C:integral component of membrane; C:clathrin-coated vesicle; F:DNA binding; F:transcription factor activity, sequence-specific DNA binding; F:protein serine/threonine phosphatase activity; F:transposase activity; F:transporter activity; F:metal ion binding; F:phosphatidylinositol-3,5-bisphosphate binding; P:transposition, DNA-media…	-
C172R059	sjchgc04011 protein	1.52555	-	7	1.1e-11	0.7829	1	F:ion binding	-
C047R028	charged multivesicular body protein 1b	1.52503	-	50	4.9e-105	0.9556	14	C:ESCRT III complex; C:cytosol; C:membrane coat; C:late endosome membrane; C:extracellular exosome; F:protein domain specific binding; P:cell separation after cytokinesis; P:nucleus organization; P:vacuolar transport; P:mitotic metaphase plate congression; P:regulation of centrosome duplication; P:protein transport; P:viral budding via host ESCRT complex; P:regulation of mitotic spindle assembly	-
C160R096	tyrosine-protein kinase jak1	1.52485	-	50	2e-49	0.7678	27	C:nucleus; C:cytosol; C:cytoskeleton; C:focal adhesion; C:extrinsic component of cytoplasmic side of plasma membrane; F:non-membrane spanning protein tyrosine kinase activity; F:growth hormone receptor binding; F:ATP binding; F:protein phosphatase binding; F:ubiquitin protein ligase binding; F:CCR5 chemokine receptor binding; P:activation of MAPKK activity; P:epidermal growth factor receptor sign…	-
C163R100	kinase d-interacting substrate of 220 kda isoform x1	1.52432	1.45028	50	0	0.7964	6	C:late endosome; C:membrane; F:protein kinase regulator activity; F:PDZ domain binding; P:nerve growth factor signaling pathway; P:regulation of protein kinase activity	-
C230R126	proteasome subunit alpha type-6	1.52379	1.41683	50	1.5e-179	0.9158	41	C:cytoplasmic mRNA processing body; C:nucleoplasm; C:cytosol; C:polysome; C:nuclear matrix; C:proteasome core complex, alpha-subunit complex; C:sarcomere; C:extracellular exosome; F:RNA binding; F:threonine-type endopeptidase activity; F:purine ribonucleoside triphosphate binding; F:NF-kappaB binding; P:mitotic S phase; P:mitotic anaphase; P:activation of MAPKK activity; P:protein polyubiquitinat…	-
C146R041	cytoplasmic dynein 1 intermediate chain 2 isoform x1	1.52362	1.45616	50	0	0.902	3	C:cytoplasmic dynein complex; F:protein binding; P:microtubule-based movement	-
C025R081	multivesicular body subunit 12a	1.52309	1.92764	50	2.5e-127	0.684	12	C:ESCRT I complex; C:nucleoplasm; C:centrosome; C:cytosol; C:aggresome; C:extracellular exosome; F:lipid binding; F:ubiquitin binding; P:virus maturation; P:regulation of epidermal growth factor receptor signaling pathway; P:positive regulation of viral process; P:regulation of viral budding via host ESCRT complex	-
C062R132	formin-like protein 1	1.52256	1.59273	50	1.9e-180	0.8542	4	F:actin binding; F:Rho GTPase binding; P:regulation of cell shape; P:actin cytoskeleton organization	-
C053R102	polymeric immunoglobulin receptor	1.52203	1.4025	50	0	0.6714	1	F:protein binding	-
C172R159	preli domain-containing protein mitochondrial	1.52186	1.68413	50	3.5e-96	0.859	12	C:nucleoplasm; C:mitochondrial intermembrane space; C:protein complex; F:phosphatidic acid transporter activity; P:negative regulation of mitochondrial membrane potential; P:positive regulation of endopeptidase activity; P:regulation of T cell differentiation; P:positive regulation of T cell apoptotic process; P:negative regulation of release of cytochrome c from mitochondria; P:regulation of mem…	-
C230R105	macrophage mannose receptor 1-like	1.52168	-	50	5.5e-77	0.6628	1	P:biological_process	-
C252R149	nedd4 family-interacting protein 1-like	1.52151	1.57826	50	1.6e-132	0.8902	20	C:Golgi apparatus; C:cell cortex; C:perinuclear region of cytoplasm; F:signal transducer activity; P:regulation of myeloid leukocyte differentiation; P:negative regulation of type 2 immune response; P:cellular iron ion homeostasis; P:negative regulation of gene expression; P:positive regulation of protein ubiquitination; P:negative regulation of transporter activity; P:negative regulation of inte…	-
C078R132	interferon-induced very large gtpase 1-like	1.52133	1.61645	50	0	0.6994	1	F:GTP binding	-
C096R025	antigen peptide transporter 1	1.52133	-	50	0	0.792	10	C:TAP complex; F:ATP binding; F:peptide-transporting ATPase activity; F:MHC protein binding; F:TAP2 binding; P:metabolic process; P:peptide transport; P:antigen processing and presentation of endogenous peptide antigen via MHC class I; P:intracellular transport; P:transmembrane transport	-
C189R008	interferon regulatory factor 1	1.52115	-	50	0	0.6856	8	C:nucleus; F:regulatory region DNA binding; F:transcription factor activity, sequence-specific DNA binding; P:regulation of transcription, DNA-templated; P:apoptotic process; P:negative regulation of cell proliferation; P:response to peptide hormone; P:regulation of immune response	-
C071R137	prolyl endopeptidase	1.52063	1.60158	50	0	0.8626	11	C:nucleus; C:mitochondrial matrix; C:cytosol; C:membrane; F:metalloendopeptidase activity; F:serine-type endopeptidase activity; F:protein binding; F:zinc ion binding; F:peptide binding; F:serine-type exopeptidase activity; P:protein processing	-
C138R013	arginase- mitochondrial	1.52045	-	50	3.1e-164	0.8638	8	C:mitochondrial matrix; F:arginase activity; F:metal ion binding; P:urea cycle; P:ureteric bud development; P:arginine metabolic process; P:nitric oxide biosynthetic process; P:striated muscle contraction	-
C204R053	alpha beta hydrolase domain-containing protein 14b	1.52028	1.68568	50	1.4e-135	0.8254	4	C:nucleus; C:cytoplasm; F:hydrolase activity; P:metabolic process	-
C261R132	---NA---	1.52028	1.40169	0	-	-	-	-	-
C251R125	gastrula zinc finger	1.51975	1.51817	50	0	0.656	2	F:nucleic acid binding; F:metal ion binding	-
C261R156	arginine--trna cytoplasmic	1.51975	1.50629	50	0	0.9108	7	C:nucleoplasm; C:mitochondrion; C:membrane; C:extracellular exosome; F:arginine-tRNA ligase activity; F:ATP binding; P:arginyl-tRNA aminoacylation	-
C233R162	zinc finger protein 91-like	1.51975	1.37047	50	0	0.7006	2	F:DNA binding; F:metal ion binding	-
C126R167	e3 ubiquitin-protein ligase ubr5 isoform x5	1.51887	1.51239	50	0	0.9782	6	F:RNA binding; F:ubiquitin-protein transferase activity; F:zinc ion binding; F:ligase activity; F:ubiquitin binding; P:protein ubiquitination	-
C221R008	nuclear factor nf-kappa-b p100 subunit isoform x1	1.51887	-	50	0	0.8118	14	C:nucleoplasm; C:cytosol; C:I-kappaB/NF-kappaB complex; F:RNA polymerase II regulatory region sequence-specific DNA binding; F:RNA polymerase II transcription factor activity, sequence-specific DNA binding; F:chromatin binding; F:protein binding; P:negative regulation of transcription from RNA polymerase II promoter; P:inflammatory response; P:I-kappaB kinase/NF-kappaB signaling; P:response to cy…	-
C114R136	---NA---	1.51835	1.5931	0	-	-	-	-	-
C265R096	---NA---	1.51817	1.62958	0	-	-	-	-	-
C135R068	transmembrane and coiled-coil domain-containing protein 1	1.51729	1.40916	50	9.9e-105	0.9666	3	C:Golgi membrane; C:endoplasmic reticulum membrane; C:integral component of membrane	-
C223R042	sjchgc07762 protein	1.51729	-	29	3e-72	0.79	7	C:intermediate filament; C:integral component of membrane; F:catalytic activity; F:structural molecule activity; P:phosphate-containing compound metabolic process; P:primary metabolic process; P:organic substance metabolic process	-
C198R115	gtpase imap family member 7-like	1.51694	1.51957	50	6.6e-26	0.7746	10	C:intracellular; F:DNA binding; F:actin binding; F:transposase activity; F:structural molecule activity; F:GTP binding; P:transposition, DNA-mediated; P:regulation of transcription, DNA-templated; P:small GTPase mediated signal transduction; P:DNA integration	-
C119R063	e3 ubiquitin-protein ligase rnf31	1.51694	-	50	0	0.703	4	C:LUBAC complex; F:ubiquitin-protein transferase activity; F:zinc ion binding; P:protein ubiquitination	-
C164R145	histone-lysine n-methyltransferase partial	1.51642	1.48144	50	6.6e-12	0.9448	33	C:nuclear chromatin; C:cytoplasm; C:ESC/E(Z) complex; C:pronucleus; F:core promoter binding; F:RNA binding; F:protein binding; F:chromatin DNA binding; F:sequence-specific DNA binding; F:histone methyltransferase activity (H3-K27 specific); P:DNA methylation; P:positive regulation of epithelial to mesenchymal transition; P:regulation of gliogenesis; P:skeletal muscle satellite cell maintenance in…	-
C010R078	microfibrillar-associated protein 1	1.51589	1.82281	50	5e-148	0.9452	4	C:microfibril; F:protein binding; F:poly(A) RNA binding; P:extracellular matrix organization	-
C215R111	granulins-like	1.51589	-	50	0	0.625	2	P:liver development; P:axon extension	-
C141R156	ras-related protein rab-7a	1.51572	1.63788	50	1.4e-142	0.9848	31	C:lysosomal membrane; C:late endosome; C:Golgi apparatus; C:phagocytic vesicle membrane; C:retromer complex; C:pre-autophagosomal structure membrane; C:melanosome; C:terminal bouton; C:extracellular exosome; C:alveolar lamellar body; F:GTPase activity; F:GTP binding; F:GDP binding; F:Rac GTPase binding; P:protein targeting to lysosome; P:nucleocytoplasmic transport; P:epidermal growth factor cata…	-
C249R090	helicase with zinc finger domain 2	1.51572	1.42257	50	0	0.7034	4	F:nucleic acid binding; F:ATP binding; F:zinc ion binding; F:ligand-dependent nuclear receptor transcription coactivator activity	-
C181R154	igf-like family receptor 1	1.51572	1.41274	50	0	0.6574	2	C:integral component of membrane; F:protein binding	-
C209R105	lim domain kinase 1-like isoform x2	1.51537	1.69232	50	9.5e-98	0.8726	15	C:nucleoplasm; C:cytoplasm; C:focal adhesion; C:membrane; C:neuron projection; F:protein kinase activity; F:ATP binding; F:zinc ion binding; F:heat shock protein binding; F:protein heterodimerization activity; P:response to yeast; P:protein phosphorylation; P:positive regulation of axon extension; P:negative regulation of ubiquitin-protein transferase activity; P:positive regulation of stress fib…	-
C108R066	nedd4 family-interacting protein 1-like	1.51519	1.28506	50	1.6e-132	0.8902	20	C:Golgi apparatus; C:cell cortex; C:perinuclear region of cytoplasm; F:signal transducer activity; P:regulation of myeloid leukocyte differentiation; P:negative regulation of type 2 immune response; P:cellular iron ion homeostasis; P:negative regulation of gene expression; P:positive regulation of protein ubiquitination; P:negative regulation of transporter activity; P:negative regulation of inte…	-
C146R042	pentatricopeptide repeat-containing protein mitochondrial-like	1.51502	1.81777	50	0	0.7508	1	C:mitochondrial matrix	-
C030R072	mitochondrial import receptor subunit tom34	1.51502	1.49433	50	0	0.7944	5	C:nucleus; C:mitochondrion; C:membrane; C:intracellular organelle part; F:protein binding	-
C126R043	protein reprimo	1.51484	1.34864	50	1.9e-60	0.8452	5	C:cytoplasm; C:integral component of membrane; F:protein binding; P:cell cycle arrest; P:regulation of mitotic cell cycle	-
C264R089	dihydroxyacetone phosphate acyltransferase-like	1.51432	2.12456	50	1.9e-77	0.7108	4	F:O-acyltransferase activity; P:nervous system development; P:cellular component organization; P:cellular lipid metabolic process	-
C222R055	ran-binding protein 3 isoform x1	1.51379	1.37713	50	9.9e-96	0.6578	2	P:intracellular transport; C:intracellular	-
C131R129	2 -cyclic-nucleotide 3 -phosphodiesterase	1.51362	1.39571	50	1.6e-123	0.6812	7	C:membrane; C:organelle; C:intracellular part; F:2',3'-cyclic-nucleotide 3'-phosphodiesterase activity; F:ATP binding; P:cyclic nucleotide catabolic process; P:single-multicellular organism process	-
C211R011	poly [ADP-ribose] polymerase 14	1.51362	-	50	0	0.6786	3	F:NAD+ ADP-ribosyltransferase activity; P:metabolic process; P:regulation of apoptotic process	-
C162R108	interleukin-1 receptor-like 1 isoform x1	1.51292	1.31039	50	0	0.5842	2	F:protein binding; P:signal transduction	-
C025R088	arrestin domain-containing protein 2 isoform x1	1.51292	-	50	0	0.9076	3	F:molecular_function; P:biological_process; C:cellular_component	-
C211R108	b-cell lymphoma leukemia 10	1.51239	1.40444	50	4.4e-146	0.6726	20	C:immunological synapse; C:cytosol; C:CBM complex; C:intracellular organelle; C:membrane raft; F:kinase binding; P:B cell apoptotic process; P:neural tube closure; P:cellular defense response; P:I-kappaB kinase/NF-kappaB signaling; P:response to fungus; P:immunoglobulin mediated immune response; P:positive regulation of cysteine-type endopeptidase activity involved in apoptotic process; P:fibrobl…	-
C208R079	transmembrane and coiled-coil domain-containing protein 1	1.51222	1.49071	50	4.1e-105	0.9666	3	C:Golgi membrane; C:endoplasmic reticulum membrane; C:integral component of membrane	-
C059R085	neutrophil cytosol factor 4	1.51169	1.36336	50	0	0.7766	6	C:cytoplasm; F:protein binding; F:superoxide-generating NADPH oxidase activity; F:phosphatidylinositol binding; P:response to peptide hormone; P:oxidation-reduction process	-
C134R048	ets-related transcription factor elf-3	1.51082	2.21376	50	7.7e-101	0.5664	5	C:nucleus; F:transcription factor activity, sequence-specific DNA binding; F:protein binding; F:sequence-specific DNA binding; P:regulation of transcription, DNA-templated	-
C240R076	serine arginine-rich splicing factor 7-like isoform x1	1.51047	1.54792	50	2.6e-75	0.9496	3	F:nucleotide binding; F:nucleic acid binding; F:zinc ion binding	-
C147R143	type iv secretion protein	1.51047	1.41487	47	2.3e-31	0.5253	8	F:ATP binding; P:oxidation-reduction process; P:proteolysis; F:oxidoreductase activity; F:NAD+ binding; C:integral component of membrane; C:membrane; F:cysteine-type peptidase activity	-
C094R138	b-cell cll lymphoma 7 protein family member a	1.50925	1.6103	50	8.6e-129	0.789	2	F:protein binding; P:negative regulation of transcription, DNA-templated	-
C057R155	vacuolar protein sorting-associated protein 4b isoform x2	1.50838	1.40007	50	0	0.9632	4	F:ATP binding; F:microtubule-severing ATPase activity; P:vacuole organization; P:cytoplasmic microtubule organization	-
C151R152	otu domain-containing protein 5	1.50821	1.55689	50	0	0.8742	4	F:ubiquitin-specific protease activity; P:response to lipopolysaccharide; P:protein K63-linked deubiquitination; P:protein K48-linked deubiquitination	-
C157R077	transmembrane protein 185a	1.50821	-	50	1e-87	0.9716	3	C:integral component of membrane; C:dendrite; F:protein binding	-
C052R017	tnfaip3-interacting protein 1 isoform x1	1.50803	-	50	6.3e-87	0.6876	2	F:molecular_function; C:cellular_component	-
C027R041	---NA---	1.50786	1.60399	0	-	-	-	-	-
C176R167	cyclic amp-dependent transcription factor atf-5	1.50751	1.37459	50	1.3e-57	0.855	3	F:transcription factor activity, sequence-specific DNA binding; F:sequence-specific DNA binding; P:regulation of transcription from RNA polymerase II promoter	-
C049R066	ubiquitin-conjugating enzyme e2 l3	1.50733	1.49779	50	7.4e-93	0.9622	19	C:ubiquitin ligase complex; C:nucleus; C:cytoplasm; C:extracellular exosome; F:transcription coactivator activity; F:ATP binding; F:ligase activity; F:ubiquitin protein ligase binding; F:poly(A) RNA binding; F:ubiquitin conjugating enzyme activity; F:ubiquitin-protein transferase activator activity; P:regulation of transcription, DNA-templated; P:cell proliferation; P:protein ubiquitination invol…	-
C200R086	---NA---	1.50733	-	0	-	-	-	-	-
C193R092	lyr motif-containing protein 4	1.50681	1.6131	50	1.2e-65	0.8246	3	C:nucleus; C:mitochondrial matrix; P:small molecule metabolic process	-
C153R043	interferon-induced 35 kda protein	1.50681	1.3107	50	0	0.6956	3	C:intracellular organelle; F:nucleotide binding; F:nucleic acid binding	-
C261R033	mitogen-activated protein kinase kinase kinase kinase 2	1.50664	1.66382	50	4.1e-125	0.8156	8	C:cytoplasm; F:ATP binding; F:MAP kinase kinase kinase kinase activity; P:MAPK cascade; P:regulation of mitotic cell cycle; P:stress-activated protein kinase signaling cascade; P:activation of protein kinase activity; P:regulation of apoptotic process	-
C219R135	coiled-coil domain-containing protein partial	1.50664	1.54328	50	0	0.8694	3	F:molecular_function; P:biological_process; C:cellular_component	-
C170R126	---NA---	1.50646	1.51449	0	-	-	-	-	-
C163R091	neutrophil cytosol factor 4	1.50612	1.53563	50	0	0.7766	6	C:cytoplasm; F:protein binding; F:superoxide-generating NADPH oxidase activity; F:phosphatidylinositol binding; P:response to peptide hormone; P:oxidation-reduction process	-
C049R091	sorting nexin-6	1.50594	1.47274	50	7.1e-76	0.9732	18	C:nucleus; C:cytoplasmic membrane-bounded vesicle; C:extrinsic component of membrane; C:retromer complex; C:early endosome membrane; C:tubular endosome; F:dynactin binding; F:type I transforming growth factor beta receptor binding; F:phosphatidylinositol binding; F:protein homodimerization activity; P:intracellular protein transport; P:endocytosis; P:negative regulation of epidermal growth factor…	-
C075R065	protein rufy3 isoform x1	1.50577	-	50	2.9e-23	0.7494	3	F:metal ion binding; P:biological_process; C:cellular_component	-
C196R137	unnamed protein product	1.50542	1.46595	15	2.5e-24	0.7313	7	C:membrane; F:nucleotide binding; F:GTPase activator activity; F:anion binding; P:signal transduction; P:positive regulation of GTPase activity; P:single-organism transport	-
C028R081	protein-associating with the carboxyl-terminal domain of ezrin	1.50473	1.64509	50	1.5e-169	0.5292	3	F:protein kinase activity; F:ATP binding; P:protein phosphorylation	-
C117R037	---NA---	1.5042	1.4724	0	-	-	-	-	-
C189R169	---NA---	1.50299	1.33007	0	-	-	-	-	-
C172R109	prefoldin subunit 5	1.50264	1.53421	50	5.7e-87	0.9078	9	C:nucleus; C:cytoplasm; C:prefoldin complex; F:transcription corepressor activity; F:unfolded protein binding; P:negative regulation of transcription, DNA-templated; P:'de novo' posttranslational protein folding; P:retina development in camera-type eye; P:negative regulation of canonical Wnt signaling pathway	-
C087R163	copper transport protein atox1	1.5016	1.73127	50	9.9e-40	0.888	6	C:cytoplasm; F:copper chaperone activity; F:copper-dependent protein binding; P:cellular copper ion homeostasis; P:response to oxidative stress; P:intracellular copper ion transport	-
C217R022	formin-like protein 1	1.50108	1.28032	50	0	0.8566	4	F:actin binding; F:Rho GTPase binding; P:regulation of cell shape; P:actin cytoskeleton organization	-
C260R029	protein arginine n-methyltransferase 5 isoform x1	1.50091	1.30994	50	0	0.9072	69	C:cytosol; C:methylosome; C:histone methyltransferase complex; F:rRNA (adenine-N6,N6-)-dimethyltransferase activity; F:core promoter sequence-specific DNA binding; F:transcription corepressor activity; F:tRNA (guanine-N2-)-methyltransferase activity; F:S-methyltransferase activity; F:mRNA methyltransferase activity; F:2-polyprenyl-6-methoxy-1,4-benzoquinone methyltransferase activity; F:histone-a…	-
C193R017	general transcription factor iie subunit 1	1.50056	1.60455	50	0	0.8668	9	C:transcription factor TFIIE complex; C:intermediate filament cytoskeleton; F:transcription factor activity, core RNA polymerase II binding; F:RNA polymerase II core binding; F:transcription factor activity, RNA polymerase II transcription factor binding; F:TFIIH-class transcription factor binding; F:sequence-specific DNA binding; P:transcriptional open complex formation at RNA polymerase II prom…	-
C129R076	oocyte zinc finger protein 20	1.50039	1.77215	50	1.1e-163	0.8148	7	C:extracellular space; C:MHC class I protein complex; F:nucleic acid binding; F:metal ion binding; P:antigen processing and presentation of peptide antigen via MHC class I; P:response to virus; P:innate immune response	-
C244R127	e3 ubiquitin-protein ligase trim39-like	1.50021	1.66709	50	2.5e-73	0.6456	2	C:intracellular; F:zinc ion binding	-
C095R163	probable ubiquitin carboxyl-terminal hydrolase faf-x isoform x1	1.49935	1.23913	50	0	0.913	7	C:cytoplasm; F:cysteine-type endopeptidase activity; F:ubiquitin-specific protease activity; P:cell migration; P:protein deubiquitination; P:proteasome-mediated ubiquitin-dependent protein catabolic process; P:regulation of proteasomal protein catabolic process	-
C077R125	tribbles homolog 2	1.49865	-	50	0	0.7802	17	C:nucleus; C:cytoplasm; F:transcription corepressor activity; F:protein kinase activity; F:ATP binding; F:transcription factor binding; F:mitogen-activated protein kinase kinase binding; F:ubiquitin protein ligase binding; F:ubiquitin-protein transferase regulator activity; P:negative regulation of protein kinase activity; P:positive regulation of proteasomal ubiquitin-dependent protein catabolic…	-
C244R141	beta- -n-acetylglucosaminyltransferase radical fringe	1.49831	1.41095	50	1.8e-159	0.9212	11	C:integral component of Golgi membrane; C:extracellular exosome; F:O-fucosylpeptide 3-beta-N-acetylglucosaminyltransferase activity; F:metal ion binding; P:metabolic process; P:fourth ventricle development; P:rhombomere boundary formation; P:cell differentiation; P:positive regulation of protein binding; P:brain segmentation; P:positive regulation of Notch signaling pathway	-
C172R117	calcineurin b homologous protein 2	1.49779	1.79191	50	1.8e-112	0.8064	5	C:intracellular part; F:calcium ion binding; P:positive regulation of macromolecule metabolic process; P:positive regulation of cellular metabolic process; P:regulation of primary metabolic process	-
C250R162	tropomyosin alpha-3 chain	1.49761	1.41618	50	8.3e-45	0.923	3	F:actin binding; P:cell adhesion; P:regulation of ATPase activity	-
C052R087	---NA---	1.49744	1.65424	0	-	-	-	-	-
C081R080	ap-4 complex accessory subunit tepsin isoform x1	1.49675	1.71971	26	1.9e-58	0.6254	-	-	-
C232R011	activated rna polymerase ii transcriptional coactivator p15	1.49675	-	50	4.8e-87	0.8128	9	C:transcription factor complex; C:nucleolus; C:extracellular exosome; F:transcriptional activator activity, RNA polymerase II distal enhancer sequence-specific binding; F:single-stranded DNA binding; F:transcription coactivator activity; F:poly(A) RNA binding; P:positive regulation of transcription from RNA polymerase II promoter; P:SMAD protein signal transduction	-
C248R142	---NA---	1.49658	2.00208	0	-	-	-	-	-
C058R122	sialin	1.49658	1.81609	50	0	0.8356	6	C:lysosomal membrane; C:integral component of plasma membrane; C:cytoplasmic membrane-bounded vesicle; F:sialic acid transmembrane transporter activity; P:sialic acid transport; P:transmembrane transport	-
C027R127	cytohesin-4-like	1.49623	1.50056	50	1.6e-62	0.8598	11	C:trans-Golgi network; C:plasma membrane; F:serine-type endopeptidase activity; F:ARF guanyl-nucleotide exchange factor activity; F:protein binding; F:lipid binding; P:proteolysis; P:vesicle-mediated transport; P:regulation of cell adhesion; P:regulation of ARF protein signal transduction; P:positive regulation of GTPase activity	-
C053R160	upf0249 protein ydjc homolog	1.49554	1.51414	50	0	0.789	2	F:hydrolase activity, acting on carbon-nitrogen (but not peptide) bonds; P:carbohydrate metabolic process	-
C079R101	ranbp-type and c3hc4-type zinc finger-containing protein 1-like	1.4945	1.86111	50	3.8e-35	0.9144	18	C:LUBAC complex; F:DNA binding; F:ubiquitin-protein transferase activity; F:zinc ion binding; F:UDP-N-acetylmuramoylalanyl-D-glutamyl-2,6-diaminopimelate-D-alanyl-D-alanine ligase activity; F:ribosomal S6-glutamic acid ligase activity; F:ubiquitin binding; F:coenzyme F420-0 gamma-glutamyl ligase activity; F:coenzyme F420-2 alpha-glutamyl ligase activity; F:protein-glycine ligase activity, initiat…	-
C072R036	proteasome subunit beta type-6-b like protein	1.4933	1.62225	50	6.2e-128	0.9196	7	C:nucleus; C:cytoplasm; C:proteasome core complex; F:threonine-type endopeptidase activity; P:immune system process; P:proteasomal ubiquitin-independent protein catabolic process; P:proteasome-mediated ubiquitin-dependent protein catabolic process	-
C244R027	---NA---	1.4933	1.56573	0	-	-	-	-	-
C145R005	probable e3 ubiquitin-protein ligase dtx2	1.49312	1.55007	50	2.4e-34	0.9386	15	C:nucleoplasm; C:cytoplasm; C:nuclear membrane; F:protein binding; F:zinc ion binding; F:UDP-N-acetylmuramoylalanyl-D-glutamyl-2,6-diaminopimelate-D-alanyl-D-alanine ligase activity; F:ribosomal S6-glutamic acid ligase activity; F:coenzyme F420-0 gamma-glutamyl ligase activity; F:coenzyme F420-2 alpha-glutamyl ligase activity; F:protein-glycine ligase activity, initiating; F:protein-glycine ligas…	-
C105R082	---NA---	1.49312	1.50108	0	-	-	-	-	-
C097R024	---NA---	1.49243	1.48367	0	-	-	-	-	-
C083R147	tapasin-related	1.49226	1.53954	50	0	0.681	1	F:protein binding	-
C066R009	serine threonine-protein phosphatase 6 regulatory subunit 3 isoform x1	1.49192	1.60158	50	0	0.862	2	C:integral component of membrane; F:binding	-
C142R170	rho gtpase-activating protein partial	1.49192	1.46561	50	9.2e-48	0.7586	3	F:GTPase activator activity; P:signal transduction; P:positive regulation of GTPase activity	-
C098R046	deoxyribonuclease gamma precursor	1.4914	1.7595	2	4.4e-10	0.76	2	F:deoxyribonuclease activity; P:DNA catabolic process	-
C193R099	---NA---	1.4914	-	0	-	-	-	-	-
C252R064	---NA---	1.49123	1.45919	0	-	-	-	-	-
C199R074	zinc finger protein zpr1	1.49123	-	50	3.3e-49	0.807	11	C:cytoplasm; C:nuclear body; C:neuron projection; C:neuronal cell body; F:protein binding; F:zinc ion binding; P:blastocyst growth; P:cell proliferation; P:positive regulation of gene expression; P:cell cycle process; P:positive regulation of RNA metabolic process	-
C169R001	interferon regulatory factor 3	1.49105	-	50	0	0.6886	4	C:perinuclear region of cytoplasm; F:regulatory region DNA binding; F:transcription factor activity, sequence-specific DNA binding; P:regulation of transcription, DNA-templated	-
C045R054	cullin- partial	1.49088	1.55348	50	3e-57	0.9416	26	C:nucleoplasm; C:cytosol; C:SCF ubiquitin ligase complex; C:Parkin-FBXW7-Cul1 ubiquitin ligase complex; F:ubiquitin protein ligase binding; F:ubiquitin protein ligase activity; P:mitotic G1 phase; P:G1/S transition of mitotic cell cycle; P:mitotic S phase; P:G2/M transition of mitotic cell cycle; P:stimulatory C-type lectin receptor signaling pathway; P:protein monoubiquitination; P:cell cycle ar…	-
C266R023	f-box wd repeat-containing protein 2 isoform x2	1.49054	-	50	2.4e-162	0.926	6	C:nucleus; C:cytoplasm; F:ubiquitin-protein transferase activity; F:protein binding; P:proteolysis; P:protein ubiquitination	-
C038R036	---NA---	1.49019	2.05457	0	-	-	-	-	-
C250R057	serine arginine repetitive matrix protein 1-like isoform x1	1.48951	1.69839	50	0	0.7626	-	-	-
C049R106	synaptogyrin-2-like	1.48882	1.45767	50	1.5e-117	0.7272	3	C:integral component of membrane; C:synaptic vesicle membrane; C:neuromuscular junction	-
C037R145	nf-kappa-b inhibitor alpha	1.4883	1.84335	50	0	0.814	2	F:protein binding; P:response to virus	-
C040R133	dual specificity protein kinase clk4-like	1.4883	1.68238	50	0	0.893	8	C:nucleus; F:protein serine/threonine kinase activity; F:protein serine/threonine/tyrosine kinase activity; F:protein tyrosine kinase activity; F:ATP binding; P:peptidyl-tyrosine phosphorylation; P:regulation of RNA splicing; P:protein autophosphorylation	-
C167R045	claudin domain-containing protein 1-like	1.4883	-	50	9.4e-150	0.8474	2	C:integral component of membrane; C:cell part	-
C062R111	choline transporter-like protein 2 isoform x1	1.48813	1.43877	50	0	0.9012	2	C:integral component of membrane; P:transport	-
C168R083	cyclic amp-dependent transcription factor atf-4	1.48744	1.42191	50	0	0.803	29	C:cytoplasm; C:cytoskeleton; C:dendrite membrane; C:nuclear periphery; C:Lewy body core; C:ATF4-CREB1 transcription factor complex; C:ATF1-ATF4 transcription factor complex; C:CHOP-ATF4 complex; F:RNA polymerase II core promoter proximal region sequence-specific DNA binding; F:core promoter sequence-specific DNA binding; F:transcriptional activator activity, RNA polymerase II core promoter proxim…	-
C263R126	endonuclease 8-like 3	1.4871	1.80104	50	1.7e-31	0.8904	11	C:nucleus; F:bubble DNA binding; F:damaged DNA binding; F:double-stranded DNA binding; F:single-stranded DNA binding; F:DNA-(apurinic or apyrimidinic site) lyase activity; F:zinc ion binding; F:DNA N-glycosylase activity; P:base-excision repair; P:nucleotide-excision repair; P:nucleic acid phosphodiester bond hydrolysis	-
C135R158	formin-like protein 1	1.4859	1.46037	50	3.1e-24	0.7924	12	C:cytosol; C:plasma membrane; C:cell projection; C:phagocytic vesicle; C:extracellular exosome; F:GTPase activating protein binding; F:Rac GTPase binding; F:actin filament binding; P:small GTPase mediated signal transduction; P:regulation of cell shape; P:cortical actin cytoskeleton organization; P:actin filament severing	-
C201R139	transferase mitochondrial	1.4847	1.82092	50	0	0.75	3	C:mitochondrial matrix; P:heme biosynthetic process; P:iron-sulfur cluster assembly	-
C155R142	nedd4 family-interacting protein 1-like	1.48401	1.62751	50	1.6e-132	0.8902	20	C:Golgi apparatus; C:cell cortex; C:perinuclear region of cytoplasm; F:signal transducer activity; P:regulation of myeloid leukocyte differentiation; P:negative regulation of type 2 immune response; P:cellular iron ion homeostasis; P:negative regulation of gene expression; P:positive regulation of protein ubiquitination; P:negative regulation of transporter activity; P:negative regulation of inte…	-
C223R125	cytokine receptor-like factor 3	1.48349	1.39072	50	0	0.8426	7	C:cytoplasm; C:plasma membrane; P:G1/S transition of mitotic cell cycle; P:negative regulation of cell growth; P:positive regulation of transcription from RNA polymerase II promoter; P:positive regulation of JAK-STAT cascade; P:positive regulation of cell cycle arrest	-
C184R165	alpha- -sialyltransferase 8f-like	1.48349	-	50	0	0.8412	6	C:integral component of Golgi membrane; F:alpha-N-acetylneuraminate alpha-2,8-sialyltransferase activity; P:protein glycosylation; P:olfactory nerve formation; P:olfactory placode morphogenesis; P:sialylation	-
C238R101	splicing proline- and glutamine-rich-like	1.48298	1.46934	14	2.2e-66	0.8571	-	-	-
C123R046	ump-cmp kinase	1.48298	-	50	1.1e-88	0.8838	12	C:nucleoplasm; C:nucleolus; C:cytoplasm; C:extracellular exosome; F:cytidylate kinase activity; F:nucleoside diphosphate kinase activity; F:ATP binding; F:uridylate kinase activity; P:nucleoside diphosphate phosphorylation; P:'de novo' pyrimidine nucleobase biosynthetic process; P:pyrimidine nucleotide biosynthetic process; P:nucleoside triphosphate biosynthetic process	-
C135R085	riken cdna 1810030o07 gene	1.4823	1.74251	50	0	0.5228	3	F:molecular_function; P:biological_process; C:cellular_component	-
C240R127	lysine-specific histone demethylase 1b	1.48212	1.65538	50	0	0.9296	6	F:DNA binding; F:methyltransferase activity; F:zinc ion binding; F:oxidoreductase activity; P:methylation; P:oxidation-reduction process	-
C158R146	receptor-type tyrosine-protein phosphatase f isoform x1	1.48195	1.38543	50	0	0.9872	2	F:protein tyrosine phosphatase activity; P:peptidyl-tyrosine dephosphorylation	-
C197R027	peptidyl-prolyl cis-trans isomerase fkbp4	1.48161	-	50	2.6e-122	0.8788	32	C:nucleoplasm; C:mitochondrion; C:endoplasmic reticulum membrane; C:cytosol; C:microtubule; C:neuronal cell body; C:axonal growth cone; C:perinuclear region of cytoplasm; C:extracellular exosome; F:peptidyl-prolyl cis-trans isomerase activity; F:ATP binding; F:GTP binding; F:FK506 binding; F:protein binding, bridging; F:heat shock protein binding; F:copper-dependent protein binding; F:glucocortic…	-
C154R077	serine threonine-protein kinase pim-3	1.48144	1.57044	50	0	0.911	6	C:cytoplasm; F:protein serine/threonine kinase activity; F:ATP binding; P:regulation of mitotic cell cycle; P:negative regulation of apoptotic process; P:protein autophosphorylation	-
C044R021	something about silencing protein 10	1.48127	-	50	0	0.7654	3	C:nucleolus; C:small-subunit processome; P:maturation of SSU-rRNA from tricistronic rRNA transcript (SSU-rRNA, 5.8S rRNA, LSU-rRNA)	-
C163R085	protein rer1	1.4811	-	50	4.5e-130	0.9426	8	C:endoplasmic reticulum-Golgi intermediate compartment; C:cell surface; C:integral component of Golgi membrane; F:acetylcholine receptor binding; P:retrograde vesicle-mediated transport, Golgi to ER; P:cilium assembly; P:skeletal muscle acetylcholine-gated channel clustering; P:positive regulation of establishment of protein localization to plasma membrane	-
C093R161	vacuolar protein sorting-associated protein 13d isoform x1	1.48076	1.4538	50	4e-38	0.895	4	C:intracellular; C:extrinsic component of membrane; P:protein targeting to vacuole; P:protein retention in Golgi apparatus	-
C169R126	syntaxin-binding protein 5-like isoform x1	1.48024	-	50	2.2e-61	0.7886	2	C:integral component of membrane; P:vesicle-mediated transport	-
C121R071	bcl-2 adenovirus e1b 19 kda-interacting protein 2-like protein	1.48007	1.34428	50	6.1e-43	0.8402	8	C:nucleus; C:cytosol; F:pyrophosphatase activity; F:identical protein binding; P:apoptotic process; P:metabolic process; P:negative regulation of cell proliferation; P:regulation of growth rate	-
C019R113	---NA---	1.47939	1.41046	0	-	-	-	-	-
C059R144	transformer-2 protein homolog beta isoform x2	1.47905	1.42257	50	1e-77	0.962	8	C:nucleus; F:nucleotide binding; F:mRNA binding; F:protein binding; P:response to reactive oxygen species; P:regulation of alternative mRNA splicing, via spliceosome; P:cerebral cortex regionalization; P:positive regulation of mRNA splicing, via spliceosome	-
C208R062	daz-associated protein 1 isoform x3	1.47887	1.52326	50	1.1e-55	0.977	2	F:nucleotide binding; F:nucleic acid binding	-
C092R099	recq-mediated genome instability protein 2	1.47887	1.35488	50	8.8e-99	0.7436	4	C:mitochondrial outer membrane; C:integral component of membrane; F:DNA binding; P:regulation of cellular process	-
C168R042	proteasome inhibitor pi31 subunit	1.4787	1.45666	50	1.2e-135	0.7946	35	C:nucleoplasm; C:endoplasmic reticulum; C:cytosol; C:proteasome core complex; C:membrane; F:endopeptidase inhibitor activity; F:proteasome binding; P:mitotic S phase; P:mitotic anaphase; P:activation of MAPKK activity; P:protein polyubiquitination; P:stimulatory C-type lectin receptor signaling pathway; P:antigen processing and presentation of exogenous peptide antigen via MHC class I, TAP-depend…	-
C248R072	growth factor receptor-bound protein 2	1.47819	1.68685	50	2.6e-80	0.972	48	C:nucleoplasm; C:nucleolus; C:endosome; C:Golgi apparatus; C:cytosol; C:cell-cell junction; C:COP9 signalosome; C:vesicle membrane; C:extracellular exosome; C:Grb2-EGFR complex; F:phosphotyrosine binding; F:SH3/SH2 adaptor activity; F:epidermal growth factor receptor binding; F:neurotrophin TRKA receptor binding; F:SH3 domain binding; F:protein kinase binding; F:protein phosphatase binding; F:ide…	-
C073R080	---NA---	1.47802	1.45045	0	-	-	-	-	-
C031R117	nuclear receptor coactivator 6	1.47751	1.4629	38	1.2e-39	0.8011	3	C:nucleus; F:transcription coactivator activity; P:regulation of nucleic acid-templated transcription	-
C231R037	ribonuclease p protein subunit p25-like protein	1.47683	1.4602	50	6.2e-122	0.6904	1	F:nucleic acid binding	-
C134R061	ubiquitin-conjugating enzyme e2 b	1.4758	1.52397	50	1e-103	0.9818	42	C:nuclear chromatin; C:XY body; C:nucleoplasm; C:replication fork; C:cytosol; C:plasma membrane; C:HULC complex; F:ATP binding; F:ligase activity; F:ubiquitin protein ligase binding; F:ubiquitin protein ligase activity; F:ubiquitin conjugating enzyme activity; P:leptotene; P:response to hypoxia; P:in utero embryonic development; P:antigen processing and presentation of peptide antigen via MHC cla…	-
C107R101	ubiquitin-conjugating enzyme e2 l3	1.47563	1.74856	50	1.3e-44	0.9508	19	C:ubiquitin ligase complex; C:nucleus; C:cytoplasm; C:extracellular exosome; F:transcription coactivator activity; F:ATP binding; F:ligase activity; F:ubiquitin protein ligase binding; F:poly(A) RNA binding; F:ubiquitin conjugating enzyme activity; F:ubiquitin-protein transferase activator activity; P:regulation of transcription, DNA-templated; P:cell proliferation; P:protein ubiquitination invol…	-
C140R075	exostosin-2	1.47478	-	50	1.1e-27	0.6558	12	F:catalytic activity; P:osteoblast differentiation; P:heparan sulfate proteoglycan biosynthetic process; P:extracellular matrix organization; P:regulation of axon extension; P:retinal ganglion cell axon guidance; P:embryonic pectoral fin morphogenesis; P:odontogenesis; P:positive regulation of fibroblast growth factor receptor signaling pathway; P:chondroitin sulfate proteoglycan biosynthetic pro…	-
C217R142	dna-directed rna polymerases and iii subunit rpabc1	1.47427	1.60121	50	1.6e-141	0.9792	25	C:DNA-directed RNA polymerase II, core complex; C:DNA-directed RNA polymerase III complex; C:DNA-directed RNA polymerase I complex; C:cytosol; F:RNA polymerase I activity; F:RNA polymerase II activity; F:RNA polymerase III activity; F:DNA binding; F:protein binding; P:mRNA splicing, via spliceosome; P:transcription-coupled nucleotide-excision repair; P:transcription initiation from RNA polymerase…	-
C023R071	ubiquitin-conjugating enzyme e2 a	1.4741	1.71297	50	2.6e-75	0.9288	32	C:nuclear chromatin; C:XY body; C:replication fork; C:cytosol; C:HULC complex; F:p53 binding; F:ATP binding; F:ligase activity; F:ubiquitin protein ligase binding; F:ubiquitin protein ligase activity; F:ubiquitin conjugating enzyme activity; P:mitophagy; P:in utero embryonic development; P:antigen processing and presentation of peptide antigen via MHC class I; P:postreplication repair; P:protein …	-
C259R160	large neutral amino acids transporter small subunit 1-like	1.4741	1.47138	50	0	0.8976	20	C:nucleolus; C:cytosol; C:integral component of plasma membrane; C:apical plasma membrane; C:extracellular exosome; F:L-leucine transmembrane transporter activity; F:L-phenylalanine transmembrane transporter activity; F:L-tryptophan transmembrane transporter activity; F:antiporter activity; F:peptide antigen binding; P:cellular amino acid metabolic process; P:nervous system development; P:blood c…	-
C163R071	transposable element tcb1 partial	1.4741	1.46866	50	6.7e-83	0.6756	15	C:integral component of membrane; C:SWI/SNF complex; F:DNA binding; F:transmembrane receptor protein tyrosine kinase activity; F:transposase activity; F:ATP binding; F:mechanically-gated ion channel activity; F:ATPase activity; P:transposition, DNA-mediated; P:regulation of transcription, DNA-templated; P:transmembrane receptor protein tyrosine kinase signaling pathway; P:DNA integration; P:pepti…	-
C042R137	nuclear factor nf-kappa-b p100 subunit isoform x1	1.47223	1.34102	50	0	0.8118	14	C:nucleoplasm; C:cytosol; C:I-kappaB/NF-kappaB complex; F:RNA polymerase II regulatory region sequence-specific DNA binding; F:RNA polymerase II transcription factor activity, sequence-specific DNA binding; F:chromatin binding; F:protein binding; P:negative regulation of transcription from RNA polymerase II promoter; P:inflammatory response; P:I-kappaB kinase/NF-kappaB signaling; P:response to cy…	-
C258R069	4-trimethylaminobutyraldehyde dehydrogenase	1.47206	1.42883	50	0	0.889	6	C:cytoplasm; F:betaine-aldehyde dehydrogenase activity; F:aminobutyraldehyde dehydrogenase activity; F:4-trimethylammoniobutyraldehyde dehydrogenase activity; P:glycine betaine biosynthetic process from choline; P:oxidation-reduction process	-
C223R111	stress-induced-phosphoprotein 1	1.47172	1.71535	50	1.4e-166	0.9354	9	C:nucleus; C:Golgi apparatus; C:myelin sheath; C:protein complex; F:protein C-terminus binding; F:Hsp70 protein binding; F:poly(A) RNA binding; F:chaperone binding; P:response to stress	-
C112R151	elmo domain-containing protein 2	1.47138	1.41962	50	2.7e-142	0.879	4	C:membrane; F:GTPase activator activity; P:positive regulation of GTPase activity; P:regulation of defense response to virus	-
C022R152	b-cell lymphoma leukemia 10	1.47087	1.54828	50	4.4e-146	0.6726	20	C:immunological synapse; C:cytosol; C:CBM complex; C:intracellular organelle; C:membrane raft; F:kinase binding; P:B cell apoptotic process; P:neural tube closure; P:cellular defense response; P:I-kappaB kinase/NF-kappaB signaling; P:response to fungus; P:immunoglobulin mediated immune response; P:positive regulation of cysteine-type endopeptidase activity involved in apoptotic process; P:fibrobl…	-
C020R029	ankyrin repeat and kh domain-containing protein 1-like isoform x2	1.4707	1.4411	50	0	0.8162	1	F:nucleic acid binding	-
C128R111	paired box protein and transposase domain containing protein	1.47019	1.5312	50	1.5e-39	0.6918	10	C:Piccolo NuA4 histone acetyltransferase complex; C:cytoplasmic part; F:DNA binding; F:transposase activity; F:oxidoreductase activity; F:hydrolase activity, acting on ester bonds; F:ion binding; P:transposition, DNA-mediated; P:regulation of transcription, DNA-templated; P:DNA integration	-
C265R137	pre-mrna-splicing factor cwc25 homolog	1.47002	1.6358	50	0	0.9164	2	F:phosphatidylinositol phosphate kinase activity; P:phosphatidylinositol phosphorylation	-
C250R160	cystathionine beta-synthase-like	1.46866	1.39329	50	0	0.8916	11	C:nucleus; C:cytoplasm; F:nucleotide binding; F:RNA binding; F:cystathionine beta-synthase activity; F:heme binding; F:pyridoxal phosphate binding; F:metal ion binding; P:cysteine biosynthetic process from serine; P:cysteine biosynthetic process via cystathionine; P:hydrogen sulfide biosynthetic process	-
C210R057	inhibitor of growth protein 5	1.46747	1.39636	50	9.2e-156	0.9016	10	C:MOZ/MORF histone acetyltransferase complex; F:chromatin binding; F:zinc ion binding; F:methylated histone binding; P:DNA replication; P:negative regulation of cell proliferation; P:histone H3 acetylation; P:positive regulation of transcription, DNA-templated; P:negative regulation of growth; P:positive regulation of apoptotic signaling pathway	-
C025R133	---NA---	1.46662	1.47905	0	-	-	-	-	-
C144R026	heat shock 70 kda protein 4-like	1.46629	1.55797	50	2.2e-91	0.8026	1	F:ATP binding	-
C030R016	myb-binding protein 1a-like	1.46578	-	50	2.5e-81	0.6566	2	F:transferase activity; P:metabolic process	-
C031R128	transmembrane and coiled-coil domain-containing protein 1	1.46459	1.44493	50	4.1e-105	0.9666	3	C:Golgi membrane; C:endoplasmic reticulum membrane; C:integral component of membrane	-
C061R021	d hordein	1.46442	1.50995	27	2.8e-15	0.5311	1	F:nutrient reservoir activity	-
C213R060	nuclear factor nf-kappa-b p100 subunit isoform x1	1.46392	1.34988	50	0	0.8118	14	C:nucleoplasm; C:cytosol; C:I-kappaB/NF-kappaB complex; F:RNA polymerase II regulatory region sequence-specific DNA binding; F:RNA polymerase II transcription factor activity, sequence-specific DNA binding; F:chromatin binding; F:protein binding; P:negative regulation of transcription from RNA polymerase II promoter; P:inflammatory response; P:I-kappaB kinase/NF-kappaB signaling; P:response to cy…	-
C104R066	zinc finger protein 135-like	1.46375	1.52873	50	3.4e-36	0.7746	2	F:nucleic acid binding; F:metal ion binding	-
C197R081	multivesicular body subunit 12a	1.46358	1.47887	50	2.5e-127	0.684	12	C:ESCRT I complex; C:nucleoplasm; C:centrosome; C:cytosol; C:aggresome; C:extracellular exosome; F:lipid binding; F:ubiquitin binding; P:virus maturation; P:regulation of epidermal growth factor receptor signaling pathway; P:positive regulation of viral process; P:regulation of viral budding via host ESCRT complex	-
C249R148	signal recognition particle 14 kda protein	1.46358	1.38463	50	4.9e-57	0.9502	12	C:nucleolus; C:signal recognition particle, endoplasmic reticulum targeting; C:cytosol; C:intercellular bridge; C:extracellular exosome; F:protein binding; F:7S RNA binding; F:endoplasmic reticulum signal peptide binding; F:poly(A) RNA binding; P:translation; P:SRP-dependent cotranslational protein targeting to membrane; P:response to drug	-
C193R098	calmodulin-lysine n-methyltransferase	1.46341	-	50	3.2e-83	0.8044	3	C:cytoplasm; F:calmodulin-lysine N-methyltransferase activity; P:peptidyl-lysine methylation	-
C102R158	unnamed protein product	1.46307	-	1	3.1e-06	0.96	2	F:nucleic acid binding; F:metal ion binding	-
C147R004	---NA---	1.46307	-	0	-	-	-	-	-
C208R113	interferon-induced guanylate-binding protein 1-like	1.46307	-	50	0	0.6984	16	C:cytosol; F:actin binding; F:GTPase activity; F:GTP binding; F:enzyme binding; F:cytokine binding; F:spectrin binding; F:identical protein binding; F:Hsp90 protein binding; P:regulation of calcium-mediated signaling; P:negative regulation of T cell receptor signaling pathway; P:interferon-gamma-mediated signaling pathway; P:negative regulation of ERK1 and ERK2 cascade; P:negative regulation of s…	-
C001R143	s-adenosylmethionine synthase isoform type-2	1.46256	1.49381	50	0	0.973	18	C:cytosol; C:methionine adenosyltransferase complex; F:methionine adenosyltransferase activity; F:protein binding; F:ATP binding; F:amino acid binding; F:hydrolase activity; F:metal ion binding; P:S-adenosylmethionine biosynthetic process; P:one-carbon metabolic process; P:xenobiotic metabolic process; P:circadian rhythm; P:response to hormone; P:methylation; P:response to drug; P:phosphatidylino…	-
C156R030	prolyl endopeptidase	1.46206	-	50	0	0.8626	11	C:nucleus; C:mitochondrial matrix; C:cytosol; C:membrane; F:metalloendopeptidase activity; F:serine-type endopeptidase activity; F:protein binding; F:zinc ion binding; F:peptide binding; F:serine-type exopeptidase activity; P:protein processing	-
C024R079	sorting nexin-16 isoform x1	1.46121	1.67095	50	1.3e-154	0.661	8	C:early endosome; C:late endosome; C:extrinsic component of endosome membrane; F:phosphatidylinositol binding; F:identical protein binding; P:protein targeting to lysosome; P:endosome to lysosome transport; P:early endosome to late endosome transport	-
C099R135	60s ribosomal protein l4	1.46121	-	50	0	0.9612	8	C:nucleolus; C:focal adhesion; C:membrane; C:cytosolic large ribosomal subunit; C:extracellular exosome; F:structural constituent of ribosome; F:poly(A) RNA binding; P:cytoplasmic translation	-
C109R119	akirin-2-like	1.46088	1.90286	50	2.4e-93	0.8634	-	-	-
C145R088	lim and sh3 domain protein 1	1.46088	-	50	2.5e-56	0.9246	9	C:focal adhesion; C:cortical actin cytoskeleton; C:extracellular exosome; F:SH3/SH2 adaptor activity; F:zinc ion binding; F:ion transmembrane transporter activity; F:actin filament binding; P:positive regulation of signal transduction; P:ion transmembrane transport	-
C205R160	---NA---	1.46071	1.50559	0	-	-	-	-	-
C231R030	protein phosphatase slingshot homolog 2-like isoform x2	1.46054	1.57844	50	6.3e-61	0.58	2	F:hydrolase activity; P:cellular process	-
C057R080	gram domain-containing protein 3-like isoform x2	1.46003	-	50	9.8e-157	0.782	-	-	-
C264R146	serine threonine-protein kinase rio3	1.45885	1.85553	50	7.2e-114	0.8664	5	F:protein serine/threonine kinase activity; F:protein binding; F:ATP binding; P:protein phosphorylation; P:chromosome segregation	-
C107R023	rho-related gtp-binding protein	1.45784	-	50	2.6e-130	0.955	22	C:cytosol; C:actin filament; C:plasma membrane; C:Golgi-associated vesicle membrane; C:membrane raft; C:extracellular exosome; F:GTPase activity; F:profilin binding; F:GTP binding; F:GBD domain binding; P:insulin receptor signaling pathway; P:regulation of cell shape; P:protein transport; P:cortical actin cytoskeleton organization; P:regulation of actin cytoskeleton organization; P:positive regul…	-
C066R128	rna-binding protein 25	1.45666	1.66709	50	1.5e-133	0.8466	8	C:spliceosomal complex; C:cytoplasm; C:nuclear speck; F:nucleotide binding; F:mRNA binding; F:protein binding; P:regulation of alternative mRNA splicing, via spliceosome; P:regulation of apoptotic process	-
C029R121	mesoderm induction early response protein 1 isoform x1	1.45565	1.40023	46	8.6e-66	0.6474	5	C:nucleus; C:transcriptional repressor complex; F:DNA binding; F:signal transducer activity; P:signal transduction	-
C015R017	protein tex261	1.45565	-	50	2.5e-135	0.9468	16	C:nucleoplasm; C:nucleolus; C:ER to Golgi transport vesicle; C:integral component of Golgi membrane; C:integral component of endoplasmic reticulum membrane; C:ribonucleoprotein complex; F:DNA binding; F:double-stranded RNA binding; F:ATP binding; F:transferase activity; F:poly(A) RNA binding; F:COPII adaptor activity; P:ER to Golgi vesicle-mediated transport; P:immune response; P:positive regulat…	-
C187R121	---NA---	1.45515	1.41634	0	-	-	-	-	-
C204R050	cmp-n-acetylneuraminate-beta-galactosamide-alpha- 3-sialyltransferase partial	1.45464	1.31525	50	9.4e-19	0.6976	5	C:Golgi apparatus; C:integral component of membrane; F:sialyltransferase activity; P:protein glycosylation; P:sialylation	-
C208R166	transcriptional repressor protein partial	1.45397	1.35457	50	6.1e-112	0.9892	24	C:transcription factor complex; C:cytoplasm; C:nuclear matrix; C:Ino80 complex; C:PcG protein complex; F:four-way junction DNA binding; F:transcriptional repressor activity, RNA polymerase II core promoter proximal region sequence-specific binding; F:enhancer sequence-specific DNA binding; F:RNA binding; F:histone deacetylase binding; F:SMAD binding; F:metal ion binding; P:negative regulation of …	-
C198R012	tox high mobility group box family member 4 isoform x1	1.45397	-	50	2.9e-95	0.6482	3	P:regulation of transcription, DNA-templated; P:chromatin remodeling; F:chromatin binding	-
C231R094	---NA---	1.45397	-	0	-	-	-	-	-
C142R080	transmembrane emp24 domain-containing protein 1-like	1.45347	1.4883	50	3.2e-164	0.8196	4	C:endoplasmic reticulum; C:integral component of membrane; C:bounding membrane of organelle; P:transport	-
C177R169	probable rna-binding protein eif1ad	1.45313	1.5533	50	6.4e-95	0.7478	7	C:nucleus; F:translation initiation factor activity; F:protein binding; P:translational initiation; P:organ morphogenesis; P:posttranscriptional gene silencing by RNA; P:production of small RNA involved in gene silencing by RNA	-
C219R149	---NA---	1.45313	1.51922	0	-	-	-	-	-
C022R166	protein fam49b isoform x2	1.45297	1.49054	50	0	0.9142	3	C:cilium; C:extracellular exosome; F:protein binding	-
C191R015	---NA---	1.4528	-	0	-	-	-	-	-
C249R047	protein fam133b isoform x2	1.45246	1.75098	50	3.8e-72	0.9134	1	F:poly(A) RNA binding	-
C017R028	vacuolar protein sorting-associated protein 4b isoform x2	1.45246	1.71495	50	0	0.9718	36	C:spindle pole; C:nucleus; C:lysosome; C:early endosome; C:late endosome; C:vacuolar membrane; C:centrosome; C:cytosol; C:endosome membrane; C:extracellular exosome; C:Flemming body; F:ATP binding; F:protein C-terminus binding; F:microtubule-severing ATPase activity; F:protein homodimerization activity; P:cell separation after cytokinesis; P:potassium ion transport; P:nucleus organization; P:endo…	-
C170R113	nucleolin-like isoform x1	1.45229	1.29265	50	5e-168	0.67	5	F:nucleotide binding; F:nucleic acid binding; P:heart looping; P:rRNA processing; P:rRNA transcription	-
C074R060	ubiquitin-conjugating enzyme e2 r2	1.45213	1.4933	50	8e-147	0.955	9	C:cytoplasm; F:ATP binding; F:ligase activity; F:ubiquitin protein ligase binding; F:ubiquitin protein ligase activity; F:ubiquitin conjugating enzyme activity; P:protein monoubiquitination; P:proteasome-mediated ubiquitin-dependent protein catabolic process; P:protein K48-linked ubiquitination	-
C199R143	gamma-aminobutyric acid receptor-associated protein	1.45196	-	50	6.8e-79	0.9792	28	C:Golgi membrane; C:pre-autophagosomal structure; C:autophagosome membrane; C:lysosome; C:smooth endoplasmic reticulum; C:cytosol; C:microtubule; C:microtubule associated complex; C:plasma membrane; C:axoneme; C:actin cytoskeleton; C:extrinsic component of membrane; C:cytoplasmic vesicle; C:cell body; C:perinuclear region of cytoplasm; F:microtubule binding; F:ubiquitin protein ligase binding; F:…	-
C202R088	ras-related protein rap-1b	1.45162	1.34848	50	6.3e-119	0.9678	27	C:lipid particle; C:cytosol; C:plasma membrane; C:cell-cell junction; C:membrane raft; C:extracellular exosome; F:GTPase activity; F:GTP binding; F:GDP binding; F:protein complex binding; P:intracellular protein transport; P:nucleocytoplasmic transport; P:heart development; P:cell proliferation; P:microvillus assembly; P:platelet activation; P:Rap protein signal transduction; P:somite rostral/cau…	-
C256R060	choline transporter-like protein 2 isoform x1	1.45146	1.62883	50	0	0.9012	2	C:integral component of membrane; P:transport	-
C143R078	interferon regulatory factor 7	1.45129	1.45078	50	4.2e-164	0.7924	6	C:nucleus; C:perinuclear region of cytoplasm; F:regulatory region DNA binding; F:transcription factor activity, sequence-specific DNA binding; F:protein binding; P:regulation of transcription, DNA-templated	-
C051R113	transmembrane protein 19	1.45045	1.59844	50	5.2e-72	0.8484	1	C:integral component of membrane	-
C018R104	tc1-like transposase	1.45028	1.42389	50	1.8e-40	0.7462	7	F:DNA binding; F:transposase activity; F:ATP binding; F:actin filament binding; P:transposition, DNA-mediated; P:cell adhesion; P:DNA integration	-
C163R106	rna-directed dna polymerase from mobile element jockey-like	1.44978	-	50	1.3e-79	0.7766	9	F:protein binding; F:methyltransferase activity; F:oxidoreductase activity, acting on NAD(P)H; F:oxidoreductase activity, acting on paired donors, with incorporation or reduction of molecular oxygen, 2-oxoglutarate as one donor, and incorporation of one atom each of oxygen into both donors; F:quinone binding; F:NAD binding; P:methylation; P:oxidation-reduction process; P:protein complex subunit o…	-
C048R068	interferon-inducible protein gig1	1.44961	1.35927	50	2.1e-91	0.5784	1	C:membrane	-
C025R069	unnamed protein product	1.44961	-	1	3.8e-38	0.56	-	-	-
C091R145	tnfaip3-interacting protein 1 isoform x1	1.44894	1.55941	50	6.3e-87	0.6876	2	F:molecular_function; C:cellular_component	-
C235R051	tapasin-related protein	1.44827	1.49865	50	0	0.6946	3	C:membrane; F:protein binding; P:antigen processing and presentation of endogenous peptide antigen via MHC class I	-
C015R031	---NA---	1.44827	1.41994	0	-	-	-	-	-
C035R005	serine threonine-protein kinase endoribonuclease ire1-like	1.44827	-	50	0	0.6506	7	F:ribonuclease activity; F:protein kinase activity; F:protein binding; F:ATP binding; P:mRNA processing; P:protein phosphorylation; P:RNA phosphodiester bond hydrolysis	-
C163R149	---NA---	1.44777	1.35959	0	-	-	-	-	-
C077R151	histone-lysine n-methyltransferase 2c-like isoform x2	1.44693	1.50229	50	2.8e-110	0.8756	4	C:nucleus; F:zinc ion binding; F:histone-lysine N-methyltransferase activity; P:histone lysine methylation	-
C056R024	---NA---	1.44693	1.39008	0	-	-	-	-	-
C026R167	zinc finger protein 276	1.44677	1.78468	50	5.2e-29	0.624	1	F:binding	-
C118R080	protein polybromo-1-like	1.4466	1.66979	50	1.3e-40	0.9774	18	C:nuclear chromosome; C:kinetochore; C:membrane; C:BAF-type complex; F:DNA binding; F:chromatin binding; F:protein binding; P:placenta development; P:blood vessel remodeling; P:heart morphogenesis; P:epicardium-derived cardiac endothelial cell differentiation; P:chromatin remodeling; P:mitotic nuclear division; P:negative regulation of cell proliferation; P:positive regulation of transcription, D…	-
C106R162	endophilin-b2-like isoform x2	1.4466	1.63373	50	0	0.859	3	C:nucleoplasm; C:cytoplasm; F:protein binding	-
C135R030	eukaryotic translation initiation factor 3 subunit b	1.4466	-	50	0	0.9346	12	C:nucleoplasm; C:cytosol; C:eukaryotic 43S preinitiation complex; C:eukaryotic 48S preinitiation complex; C:extracellular exosome; C:eukaryotic translation initiation factor 3 complex, eIF3m; F:nucleotide binding; F:translation initiation factor activity; F:translation initiation factor binding; F:protein complex scaffold; P:formation of translation preinitiation complex; P:regulation of translat…	-
C136R150	morc family cw-type zinc finger protein 3	1.44643	-	36	5.1e-46	0.5161	1	F:zinc ion binding	-
C069R018	clathrin light chain b isoform x1	1.4456	-	50	7.8e-132	0.7918	6	C:clathrin coat of trans-Golgi network vesicle; C:clathrin coat of coated pit; F:structural molecule activity; F:clathrin heavy chain binding; P:intracellular protein transport; P:clathrin-mediated endocytosis	-
C162R154	exportin-6	1.44526	-	50	6.1e-175	0.9356	7	C:nucleoplasm; C:nucleolus; C:cytoplasm; C:plasma membrane; F:Ran GTPase binding; F:protein transporter activity; P:protein export from nucleus	-
C235R072	nadh dehydrogenase	1.44476	1.80375	50	1e-136	0.9274	6	C:mitochondrial respiratory chain complex I; F:NADH dehydrogenase activity; F:4 iron, 4 sulfur cluster binding; P:response to oxidative stress; P:mitochondrial respiratory chain complex I assembly; P:oxidation-reduction process	-
[truncated: 3,466 more rows]
